# Supplementary material for: Asymmetric formation of tert-alkylamines from serinols by a dual function catalyst
Source: Royal Society of Chemistry journal article supplement (doi:10.1039/c3cc45099f), 2013-01-01

## Supporting Information

### Asymmetric Formation of *tert*-Alkylamines from Serinols by a Dual Function Catalyst

Young Suk You, Tae Woo Kim and Sung Ho Kang\*

Molecular-Level Interface Research Center (MIRC), Department of Chemistry, KAIST, Daejeon 305-701, Korea

E-mail: [shkang@kaist.ac.kr](mailto:shkang@kaist.ac.kr)

#### Contents

|       |                                                                                                                                                          |     |
|-------|----------------------------------------------------------------------------------------------------------------------------------------------------------|-----|
| I.    | General Information                                                                                                                                      | S2  |
| II.   | Preparation of the Substrates <b>1</b> and <b>12–23</b>                                                                                                  | S2  |
| III.  | General Procedure for the Consecutive Asymmetric Desymmetrization and Kinetic Resolution                                                                 | S8  |
| IV.   | HPLC Analysis Conditions to Determine the % ee Values of the Oxazolidinone Benzoates <b>11</b> and <b>24–35</b>                                          | S8  |
| V.    | HPLC Chromatograms of the Oxazolidinone Benzoates <b>11</b> and <b>24–35</b>                                                                             | S9  |
| VI.   | Spectral Data of the Oxazolidinone Benzoates <b>11</b> and <b>24–35</b> Prepared from the Consecutive Asymmetric Desymmetrization and Kinetic Resolution | S23 |
| VII.  | Determination of the Absolute Configuration of the Oxazolidinone Benzoates <b>11</b> , <b>24–26</b> , <b>28–32</b> and <b>35</b>                         | S28 |
| VIII. | References                                                                                                                                               | S35 |
| IX.   | Selected NMR Spectral Charts                                                                                                                             | S36 |

## I. General Information

$^1\text{H}$  and  $^{13}\text{C}$  NMR spectra were obtained on Bruker AVANCE 400 spectrometer (400 MHz for  $^1\text{H}$  NMR, 100 MHz for  $^{13}\text{C}$  NMR) and measured in  $\text{CDCl}_3$ . Chemical shifts were recorded in ppm relative to  $\text{SiMe}_4$  ( $\delta = 0.00$ ) and referenced internally to the protio impurity of  $\text{CDCl}_3$  ( $\delta = 7.24$ ) as the internal standard; coupling constants were reported in Hz. The high resolution mass spectra were recorded on Bruker microTOF-Q II spectrometer. The enantioselectivity were determined by HPLC. HPLC measurements were done on a DIONEX model equipped with P580G pump, UV 525 detector (Thermo Science, Waltham, MA) measured at 254 nm, and chiral columns DAICEL AD-H. Eluting solvent was a mixture of 2-propanol and hexane. Optical rotations were measured on a polarimeter (JASCO) in a 10-cm cell. All reactions were carried out in oven-dried glassware under a  $\text{N}_2$  atmosphere. All solvents were distilled from the indicated drying reagents right before use:  $\text{Et}_2\text{O}$ , THF and toluene (Na, benzophenone),  $\text{CH}_2\text{Cl}_2$  ( $\text{P}_2\text{O}_5$ ), and MeCN ( $\text{CaH}_2$ ). The normal work-up included extraction, drying over  $\text{Na}_2\text{SO}_4$  and evaporation of volatile materials *in vacuo*. Purification by column chromatography was performed using Merck (Darmstadt, Germany) silica gel (200-400 mesh).

## II. Preparation of the Substrates

### 1) Diols **1**, **13–15**, **17** and **18**

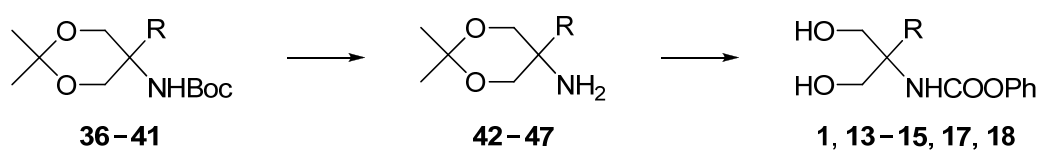

**36, 42, 1**    R = Bn  
**37, 43, 13**    R = Et  
**38, 44, 14**    R =  $\text{CH}_2\text{Bn}$

**39, 45, 15**    R =  $\text{CH}_2\text{-cHx}$   
**40, 46, 17**    R =  $\text{CH}_2\text{CH=CH}_2$   
**41, 47, 18**    R =  $\text{CH=CH}_2$

Diols **1**, **13–15**, **17** and **18** were obtained by the same procedure starting from the known acetonides **36–41**.<sup>12,13</sup> The detailed procedure to prepare **1** from **36** is described as a representative. To **36** (423 mg, 1.32 mmol) dissolved in  $\text{CH}_2\text{Cl}_2$  (10 mL) were added 2,6-lutidine (0.23 mL, 2.0 mmol) and TMSOTf (0.31 mL, 1.71 mmol) at  $-78^\circ\text{C}$  in sequence. After completing the additions, the dry ice/acetone bath was replaced by an ice/water bath.

The reaction mixture was stirred at that temperature for 2 hours, and then quenched with saturated aqueous NaHCO<sub>3</sub> (10 mL). The normal work-up with EtOAc (7 mL, four times) and the following purification by column chromatography (EtOAc/hexane = 1/1, then CH<sub>2</sub>Cl<sub>2</sub>/MeOH = 20/1) afforded **42** (252 mg, 86% yield). **42** (252 mg, 1.14 mmol) was dissolved in CH<sub>2</sub>Cl<sub>2</sub> (10 mL), and then Et<sub>3</sub>N (0.19 mL, 1.37 mmol) and phenyl chloroformate (0.16 mL, 1.25 mmol) were injected to the substrate in an ice/water bath. After stirring the resulting solution at that temperature for an hour, the reaction mixture was quenched with saturated aqueous NH<sub>4</sub>Cl (10 mL). The normal work-up with EtOAc (7 mL, three times) followed by evaporation of all the volatile materials furnished the crude phenyl carbamate acetonide. The crude product was heated in a 1:1 mixture of AcOH and H<sub>2</sub>O (5 mL) at 80 °C for an hour. Removal of all the volatile materials in vacuo and the subsequent chromatographic separation (EtOAc/hexane = 1/1) gave diol **1** (319 mg, 93% yield). For **1**: <sup>1</sup>H NMR (400 MHz, CDCl<sub>3</sub>) δ 7.39 – 7.30 (m, 4H), 7.30 – 7.19 (m, 4H), 7.14 – 7.08 (m, 2H), 5.53 (s, 1H), 3.82 (d, *J* = 11.6 Hz, 2H), 3.64 (d, *J* = 11.5 Hz, 2H), 3.51 (s, 2H), 2.96 (s, 2H). <sup>13</sup>C NMR (100 MHz, CDCl<sub>3</sub>) δ 155.07, 150.67, 135.72, 130.55, 129.51, 128.75, 127.17, 125.81, 121.79, 65.24, 60.15, 37.80. HRMS (ESI) *m/z* calcd for C<sub>17</sub>H<sub>19</sub>NNaO<sub>4</sub> [M+Na]<sup>+</sup>, 324.1206; found, 324.1211.

From **37** (320 mg, 1.23 mmol) through **43** (158 mg, 1.00 mmol, 81% yield) to **13** (210 mg, 88% yield). For **13**: <sup>1</sup>H NMR (400 MHz, CDCl<sub>3</sub>) δ 7.38 – 7.31 (m, 2H), 7.22 – 7.16 (m, 1H), 7.12 – 7.08 (m, 2H), 5.67 (s, 1H), 3.82 (d, *J* = 11.5 Hz, 2H), 3.61 (d, *J* = 11.5 Hz, 2H), 1.64 (q, *J* = 7.5 Hz, 2H), 0.89 (t, *J* = 7.5 Hz, 3H). <sup>13</sup>C NMR (100 MHz, CDCl<sub>3</sub>) δ 155.02, 150.76, 129.46, 125.67, 121.75, 66.02, 59.90, 25.27, 7.61. HRMS (ESI) *m/z* calcd for C<sub>12</sub>H<sub>17</sub>NNaO<sub>4</sub> [M+Na]<sup>+</sup>, 262.1050; found, 262.1055.

From **38** (402 mg, 1.20 mmol) through **44** (248 mg, 1.06 mmol, 86% yield) to **14** (307 mg, 0.98 mmol, 92% yield). For **14**: <sup>1</sup>H NMR (400 MHz, CDCl<sub>3</sub>) δ 7.40 – 7.32 (m, 2H), 7.30 – 7.25 (m, 2H), 7.23 – 7.15 (m, 4H), 7.14 – 7.08 (m, 2H), 5.64 (s, 1H), 3.95 (d, *J* = 11.5 Hz, 2H), 3.72 (d, *J* = 11.5 Hz, 2H), 2.71 – 2.63 (m, 2H), 2.01 – 1.91 (m, 2H). <sup>13</sup>C NMR (100 MHz, CDCl<sub>3</sub>) δ 154.96, 150.80, 141.55, 129.54, 128.72, 128.44, 126.30, 125.78, 121.76, 66.59, 59.95, 34.92, 29.78. HRMS (ESI) *m/z* calcd for C<sub>18</sub>H<sub>21</sub>NNaO<sub>4</sub> [M+Na]<sup>+</sup>, 338.1363; found, 338.1361.

From **39** (407 mg, 1.24 mmol) through **45** (252 mg, 1.10 mmol, 89% yield) to **15** (301 mg, 0.98 mmol, 89% yield). For **15**: <sup>1</sup>H NMR (400 MHz, CDCl<sub>3</sub>) δ 7.35 (dd, *J* = 8.5, 7.3 Hz, 2H),

7.23 – 7.17 (m, 1H), 7.12 – 7.07 (m, 2H), 5.56 (s, 1H), 3.91 (d,  $J = 11.5$  Hz, 2H), 3.63 (d,  $J = 11.5$  Hz, 2H), 3.41 (s, 2H), 1.77 – 1.57 (m, 5H), 1.49 (d,  $J = 5.6$  Hz, 2H), 1.40 (dddt,  $J = 14.0, 8.8, 5.9, 2.6$  Hz, 1H), 1.30 – 1.06 (m, 3H), 1.05 – 0.93 (m, 2H).  $^{13}\text{C}$  NMR (100 MHz,  $\text{CDCl}_3$ )  $\delta$  154.94, 150.76, 129.50, 125.73, 121.79, 66.97, 60.26, 40.30, 35.22, 33.01, 26.46, 26.18. HRMS (ESI)  $m/z$  calcd for  $\text{C}_{17}\text{H}_{25}\text{NNaO}_4$   $[\text{M}+\text{Na}]^+$ , 330.1676; found, 330.1670.

From **40** (346 mg, 1.27 mmol) through **46** (182 mg, 1.07 mmol, 84% yield) to **17** (228 mg, 0.91 mmol, 85% yield). For **17**:  $^1\text{H}$  NMR (400 MHz,  $\text{CDCl}_3$ )  $\delta$  7.36 (dd,  $J = 8.5, 7.3$  Hz, 2H), 7.23 – 7.18 (m, 1H), 7.13 – 7.06 (m, 2H), 5.85 (ddt,  $J = 15.3, 10.7, 7.5$  Hz, 1H), 5.58 (s, 1H), 5.23 (d,  $J = 1.2$  Hz, 1H), 5.22 – 5.17 (m, 1H), 3.88 (d,  $J = 11.7$  Hz, 2H), 3.66 (d,  $J = 11.7$  Hz, 2H), 3.26 (s, 2H), 2.41 (dd,  $J = 7.4, 1.3$  Hz, 2H).  $^{13}\text{C}$  NMR (100 MHz,  $\text{CDCl}_3$ )  $\delta$  155.15, 150.73, 132.26, 129.52, 125.82, 121.75, 120.32, 66.07, 59.49, 37.49. HRMS (ESI)  $m/z$  calcd for  $\text{C}_{13}\text{H}_{17}\text{NNaO}_4$   $[\text{M}+\text{Na}]^+$ , 274.1050; found, 274.1051.

From **41** (520 mg, 2.00 mmol) through **47** (252 mg, 1.60 mmol, 80% yield) to **18** (316 mg, 1.33 mmol, 83% yield). For **18**:  $^1\text{H}$  NMR (400 MHz,  $\text{CDCl}_3$ )  $\delta$  7.39 – 7.32 (m, 2H), 7.23 – 7.18 (m, 1H), 7.12 (dd,  $J = 8.6, 1.2$  Hz, 2H), 5.91 – 5.81 (m, 2H), 5.37 – 5.26 (m, 2H), 3.79 (d,  $J = 11.7$  Hz, 2H), 3.73 (d,  $J = 11.7$  Hz, 2H), 3.14 (s, 2H).  $^{13}\text{C}$  NMR (100 MHz,  $\text{CDCl}_3$ )  $\delta$  155.12, 150.73, 136.32, 129.51, 125.81, 121.74, 116.73, 66.19, 62.65. HRMS (ESI)  $m/z$  calcd for  $\text{C}_{12}\text{H}_{15}\text{NNaO}_4$   $[\text{M}+\text{Na}]^+$ , 260.0893; found, 260.0885.

## 2) Diol **12**

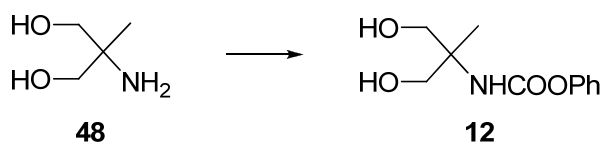

To the commercial amino diol **48** (315 mg, 3.0 mmol) dissolved in  $\text{CH}_2\text{Cl}_2$  (10 mL) were added  $\text{NaHCO}_3$  (380 mg, 4.5 mmol) and phenyl chloroformate (0.41 mL, 3.3 mmol) in sequence in an ice/water bath. The reaction mixture was stirred at that temperature for 3 hours and then at room temperature for 8 hours. After quenching the reaction with water (10 mL), the normal work-up with EtOAc (7 mL, three times) and the subsequent chromatographic purification (EtOAc/hexane = 1/1) offered diol **12** (304 mg, 45% yield). For **12**:  $^1\text{H}$  NMR (400 MHz,  $\text{CDCl}_3$ )  $\delta$  7.35 (t,  $J = 7.9$  Hz, 2H), 7.20 (t,  $J = 7.4$  Hz, 1H), 7.15 – 7.07 (m, 2H), 5.64 (s, 1H), 3.81 (d,  $J = 11.5$  Hz, 2H), 3.69 (d,  $J = 11.4$  Hz, 2H), 3.07 (s, 2H), 1.24 (s, 3H).  $^{13}\text{C}$  NMR (100 MHz,  $\text{CDCl}_3$ )  $\delta$  154.91, 150.78, 129.50, 125.73, 121.79, 67.92, 57.56, 19.97.

HRMS (ESI)  $m/z$  calcd for  $C_{11}H_{15}NNaO_4$   $[M+Na]^+$ , 248.0893; found, 248.0897.

### 3) Diols **16** and **19**

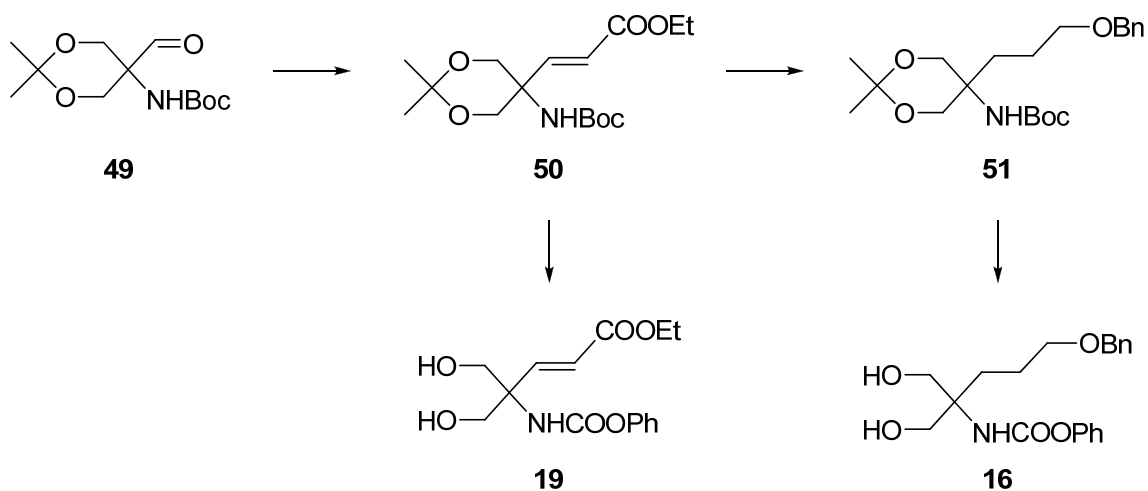

To triethyl phosphonoacetate (0.35 mL, 3.50 mmol) in THF (5 mL) was added NaH (60% dispersion in mineral oil, 140 mg, 3.50 mmol) in an ice/water bath. After stirring the mixture for 30 minutes, the known aldehyde **49**<sup>14</sup> (260 mg, 1.00 mmol) was injected using THF (5 mL), and then the resulting solution was stirred at that temperature for 30 minutes. The reaction was quenched with saturated aqueous  $NH_4Cl$  (5 mL) and water (5 mL), and the subsequent normal work-up with EtOAc (5 mL, three times), and chromatographic separation (EtOAc/hexane = 1/3) gave rise to the conjugated ester **50** (316 mg, 96% yield).  $LiBH_4$  (2.0 M in THF, 0.6 mL, 1.2 mmol) was added to **50** (165 mg, 0.50 mmol) dissolved in THF (5 mL) in an ice/water bath and the mixture was stirred at that temperature for 12 hours. After quenching the reaction with saturated aqueous  $NH_4Cl$  (10 mL) in an ice/water bath, the resulting solution was subjected to the normal work-up with EtOAc (5 mL, three times) and column chromatography (EtOAc/hexane = 1/1) to impart the corresponding allylic alcohol (103 mg, 72% yield). To the allylic alcohol (400 mg, 1.39 mmol) in MeOH (5 mL) was added Pd/C (10 wt%, 20 mg) at room temperature, and then the mixture was stirred under a hydrogen atmosphere (1 atm) at room temperature for 12 hours. After filtering the mixture through celite (500 mg) with MeOH (10 mL), the subsequent evaporation of all the volatile materials *in vacuo* and column chromatography (EtOAc/hexane = 1/1) provided the saturated alcohol (367 mg, 91% yield). Benzyl chloride (0.16 mL, 1.36 mmol) and KOH (104 mg, 1.86 mmol) were added sequentially to the saturated alcohol (360 mg, 1.24 mmol) dissolved in



$\text{CDCl}_3$ )  $\delta$  155.20, 150.78, 139.36, 129.50, 129.03, 128.01, 126.03, 125.80, 121.73, 67.79, 64.26. HRMS (ESI)  $m/z$  calcd for  $\text{C}_{16}\text{H}_{17}\text{NNaO}_4$   $[\text{M}+\text{Na}]^+$ , 310.1050; found, 310.1039.

From **53** (297 mg, 1.23 mmol) to **21** (344 mg, 1.07 mmol, 87% yield). For **21**:  $^1\text{H}$  NMR (400 MHz,  $\text{CDCl}_3$ )  $\delta$  7.40 – 7.30 (m, 6H), 7.21 (t,  $J = 7.4$  Hz, 1H), 7.13 (d,  $J = 8.4$  Hz, 2H), 6.19 (s, 1H), 3.99 (q,  $J = 11.7$  Hz, 4H), 3.11 (s, 2H).  $^{13}\text{C}$  NMR (100 MHz,  $\text{CDCl}_3$ )  $\delta$  155.11, 150.69, 133.95, 129.55, 129.15, 127.59, 125.90, 121.67, 67.65, 63.78. HRMS (ESI)  $m/z$  calcd for  $\text{C}_{16}\text{H}_{16}\text{ClNNaO}_4$   $[\text{M}+\text{Na}]^+$ , 344.0660; found, 344.0659.

From **54** (313 mg, 1.41 mmol) to **22** (386 mg, 1.28 mmol, 91% yield). For **22**:  $^1\text{H}$  NMR (400 MHz,  $\text{CDCl}_3$ )  $\delta$  7.35 (t,  $J = 7.6$  Hz, 2H), 7.30 – 7.25 (m, 2H), 7.22 – 7.07 (m, 5H), 6.18 (s, 1H), 4.06 (d,  $J = 11.7$  Hz, 2H), 3.98 (d,  $J = 11.9$  Hz, 2H), 3.26 (s, 2H), 2.32 (s, 3H).  $^{13}\text{C}$  NMR (100 MHz,  $\text{CDCl}_3$ )  $\delta$  155.17, 150.81, 137.72, 136.31, 129.72, 129.46, 125.92, 125.73, 121.75, 67.83, 64.07, 21.10. HRMS (ESI)  $m/z$  calcd for  $\text{C}_{17}\text{H}_{19}\text{NNaO}_4$   $[\text{M}+\text{Na}]^+$ , 324.1206; found, 324.1207.

#### 5) Diol **23**

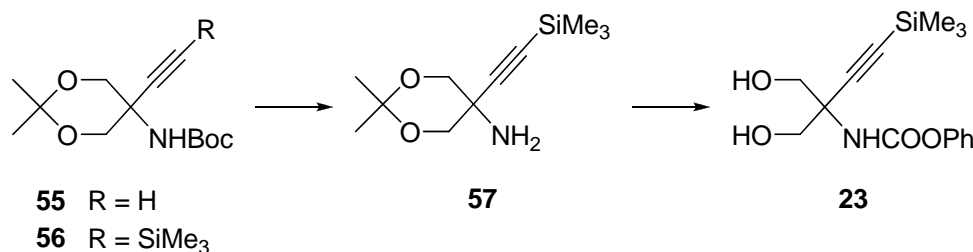

To the known acetylenic acetone **55**<sup>15</sup> (511 mg, 2.00 mmol) dissolved in THF (10 mL) was injected *n*-BuLi (2.5 M in hexane, 1.8 mL, 4.40 mmol) at  $-78^\circ\text{C}$ , and then the reaction temperature was increased to  $0^\circ\text{C}$  over 30 minutes. After cooling down the resulting solution to  $-78^\circ\text{C}$ , TMSCl (0.38 mL, 3.00 mmol) was added to the generated acetylide anion, and then the reaction mixture was stirred at that temperature for an hour. The reaction was quenched with saturated aqueous  $\text{NH}_4\text{Cl}$  (5 mL) and water (5 mL), and the following normal work-up with EtOAc (7 mL, three times) and chromatographic separation (EtOAc/hexane = 1/10) delivered the silylated acetylene acetone **56** (602 mg, 92% yield). **56** was converted to **23** by the same procedure as depicted in the formation of **1** from **36**. From **56** (400 mg, 1.22 mmol) through **57** (225 mg, 0.99 mmol, 81% yield) to **23** (243 mg, 0.79 mmol, 80% yield). For **23**:  $^1\text{H}$  NMR (400 MHz,  $\text{CDCl}_3$ )  $\delta$  7.38 – 7.31 (m, 2H), 7.23 – 7.17 (m, 1H), 7.15 – 7.09

(m, 2H), 5.86 (s, 1H), 3.96 (d,  $J = 11.6$  Hz, 2H), 3.87 (d,  $J = 11.5$  Hz, 2H), 2.97 (s, 2H), 0.16 (s, 9H).  $^{13}\text{C}$  NMR (100 MHz,  $\text{CDCl}_3$ )  $\delta$  154.23, 150.72, 129.50, 125.81, 121.72, 101.77, 91.49, 66.52, 58.15, 0.28, 0.00,  $-0.18$ . HRMS (ESI)  $m/z$  calcd for  $\text{C}_{15}\text{H}_{21}\text{NNaO}_4\text{Si}$  [ $\text{M}+\text{Na}$ ] $^+$ , 330.1132; found, 330.1132.

### III. General Procedure for the Consecutive Asymmetric Desymmetrization and Kinetic Resolution

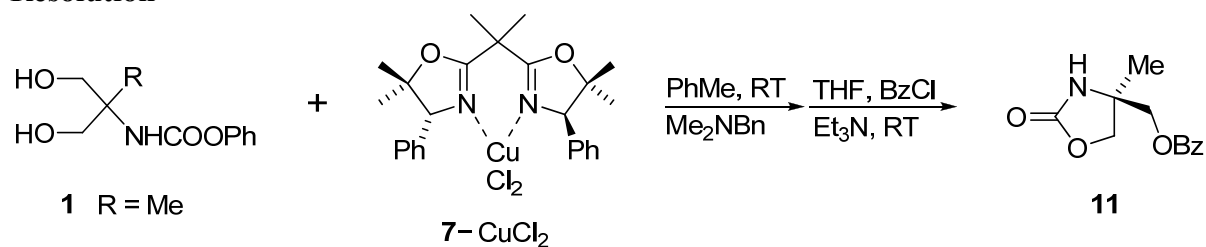

PhMe (10 mL) and *N,N*-dimethylbenzylamine (45  $\mu\text{L}$ , 0.30 mmol) were added in sequence to a mixture of the substrate **1** (75.3 mg, 0.25 mmol) and the chiral catalyst **7-CuCl<sub>2</sub>** (6.6 mg, 0.0125 mmol) at room temperature, and then the mixture was stirred at that temperature for 3 hours. To the resulting solution were injected THF (10 mL), benzoyl chloride (55  $\mu\text{L}$ , 0.48 mmol) and  $\text{Et}_3\text{N}$  (70  $\mu\text{L}$ , 0.50 mmol) sequentially at room temperature. After stirring the reaction mixture at that temperature for 24 hours, the reaction was quenched with saturated  $\text{NH}_4\text{Cl}$  (5 mL) and water (5 mL), and the following normal work-up with  $\text{EtOAc}$  (7 mL, three times) and chromatographic purification ( $\text{EtOAc}/\text{hexane} = 1/3$ ) produced the oxazolidinone benzoate **11** (66.2 mg, 85% yield).

### IV. HPLC Analysis Conditions to Determine the % ee Values of the Oxazolidinone Benzoates 11 and 24–35

Prior to the HPLC analysis of all the oxazolidinone benzoates from the consecutive asymmetric desymmetrization and kinetic resolution, the corresponding racemic mixtures were prepared, and then their HPLC analysis conditions were determined. All the oxazolidinone benzoates were analyzed by the identical HPLC analysis conditions using DAICEL AD-H as chiral column, 10% *i*-PrOH in hexane as eluent and 1 mL/min of flow rate.



## **V. HPLC Chromatograms of the Oxazolidinone Benzoates 11 and 24–35**

Prior to the HPLC analysis of the monobenzoates from the asymmetric desymmetrization, the corresponding racemic mixtures were prepared, and then their HPLC analysis conditions were determined. The HPLC analyses were carried out after the first rough purification of the crude benzoate products. Therefore, some chromatograms may contain impurity peaks probably from benzoyl chloride and/or the ligand.

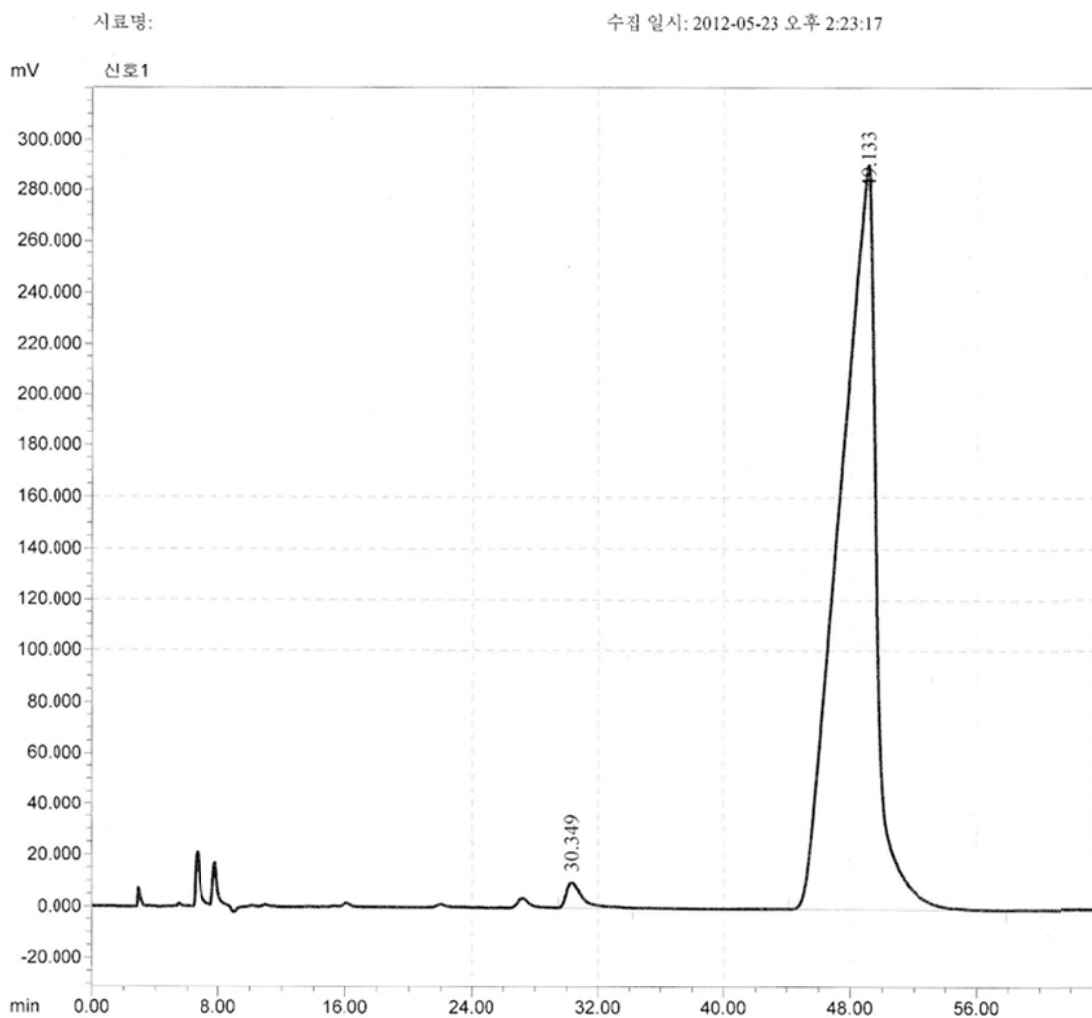

|            | 머무름 시간<br>[min] | 면적<br>[uV*sec] | 면적%<br>[%] | 표지 |
|------------|-----------------|----------------|------------|----|
| $\Delta^?$ | 30.349          | 692077.34      | 1.475      | BB |
| $\Delta^?$ | 49.133          | 46226530.91    | 98.525     | BB |
| $\Sigma$   |                 | 46918608.25    | 100.000    |    |

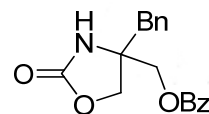

11

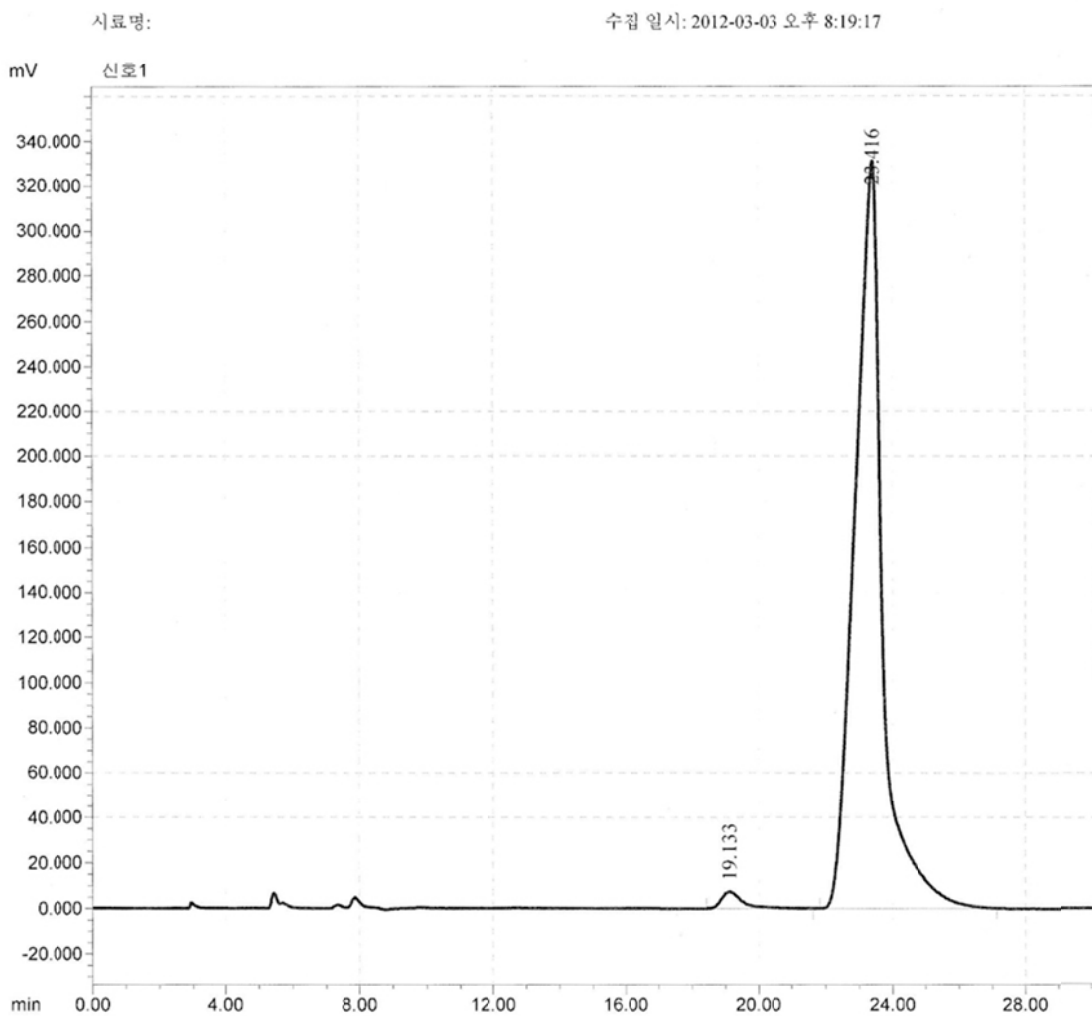

|            | 머무름 시간<br>[min] | 면적<br>[uV*sec] | 면적%<br>[%] | 표지 |
|------------|-----------------|----------------|------------|----|
| $\Delta^2$ | 19.133          | 331479.01      | 1.743      | BB |
| $\Delta^2$ | 23.416          | 18684508.68    | 98.257     | BB |
| $\Sigma$   |                 | 19015987.69    | 100.000    |    |

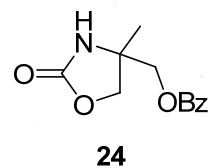

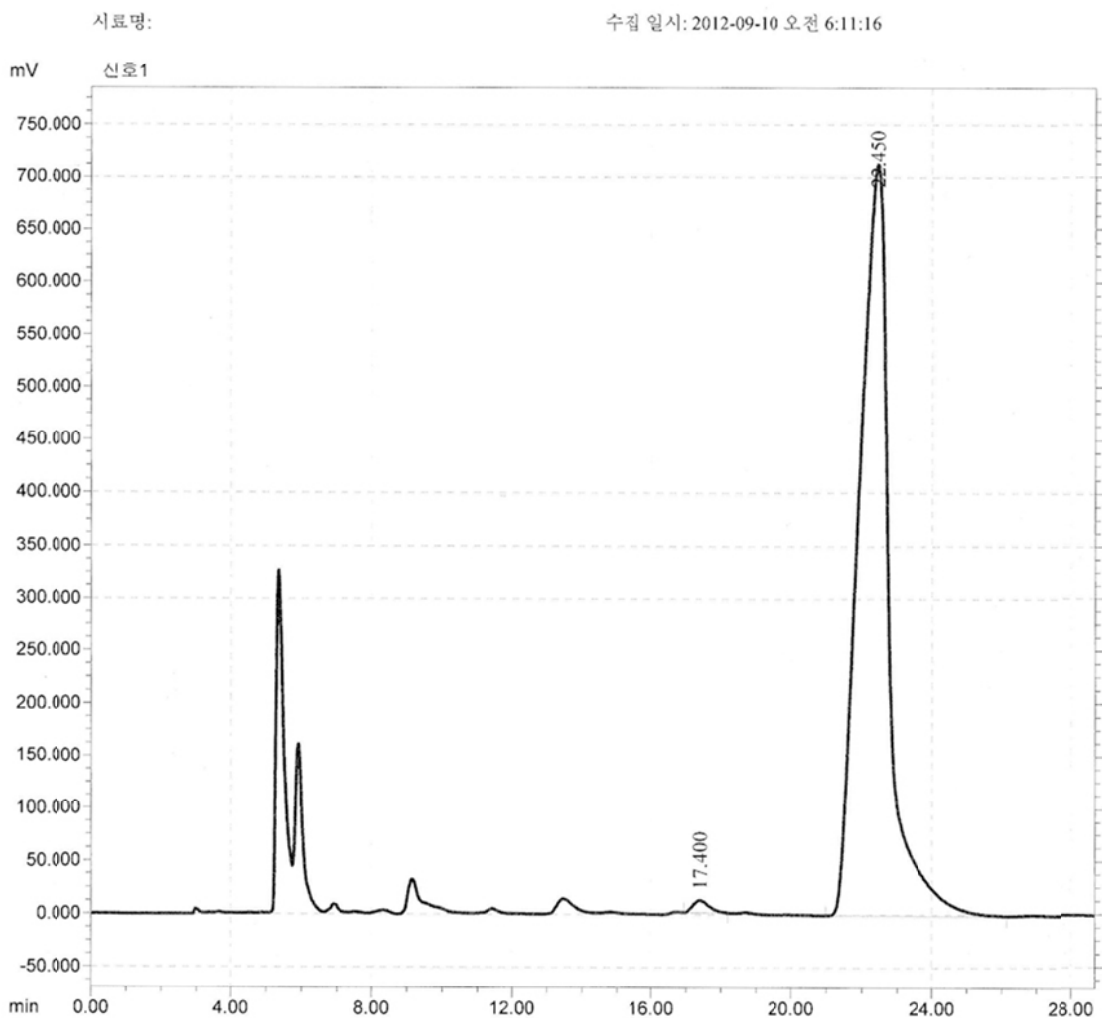

|            | 머무름 시간<br>[min] | 면적<br>[uV*sec] | 면적%<br>[%] | 표지 |
|------------|-----------------|----------------|------------|----|
| $\Delta^2$ | 17.400          | 371214.15      | 0.875      | BB |
| $\Delta^2$ | 22.450          | 42041299.05    | 99.125     | BB |
| $\Sigma$   |                 | 42412513.20    | 100.000    |    |

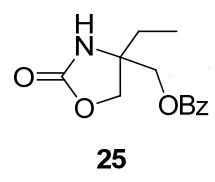

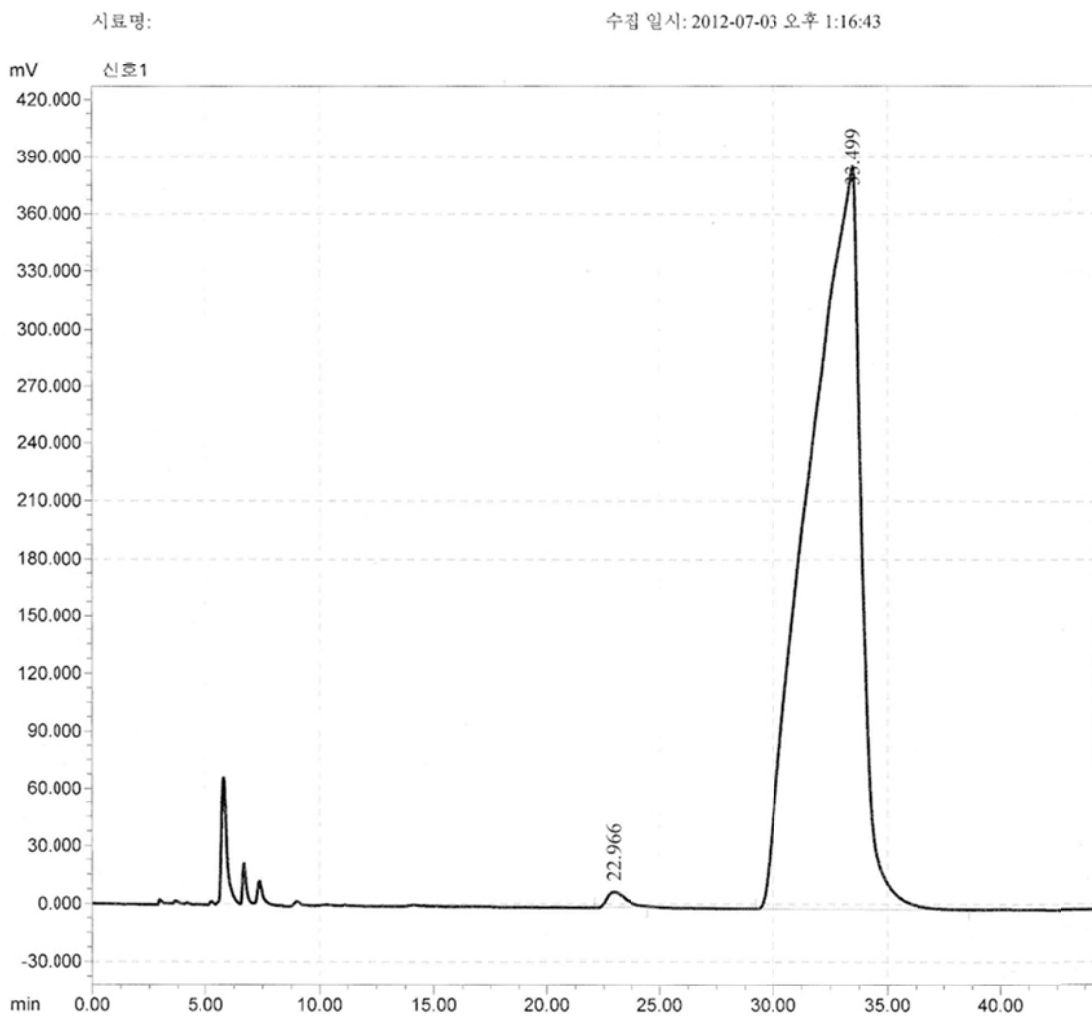

|            | 머무름 시간<br>[min] | 면적<br>[uV*sec] | 면적% 표지<br>[%] |
|------------|-----------------|----------------|---------------|
| $\Delta^?$ | 22.966          | 445172.65      | 0.720 BB      |
| $\Delta^?$ | 33.499          | 61399006.96    | 99.280 BB     |
| $\Sigma$   |                 | 61844179.61    | 100.000       |

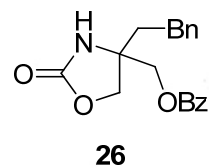

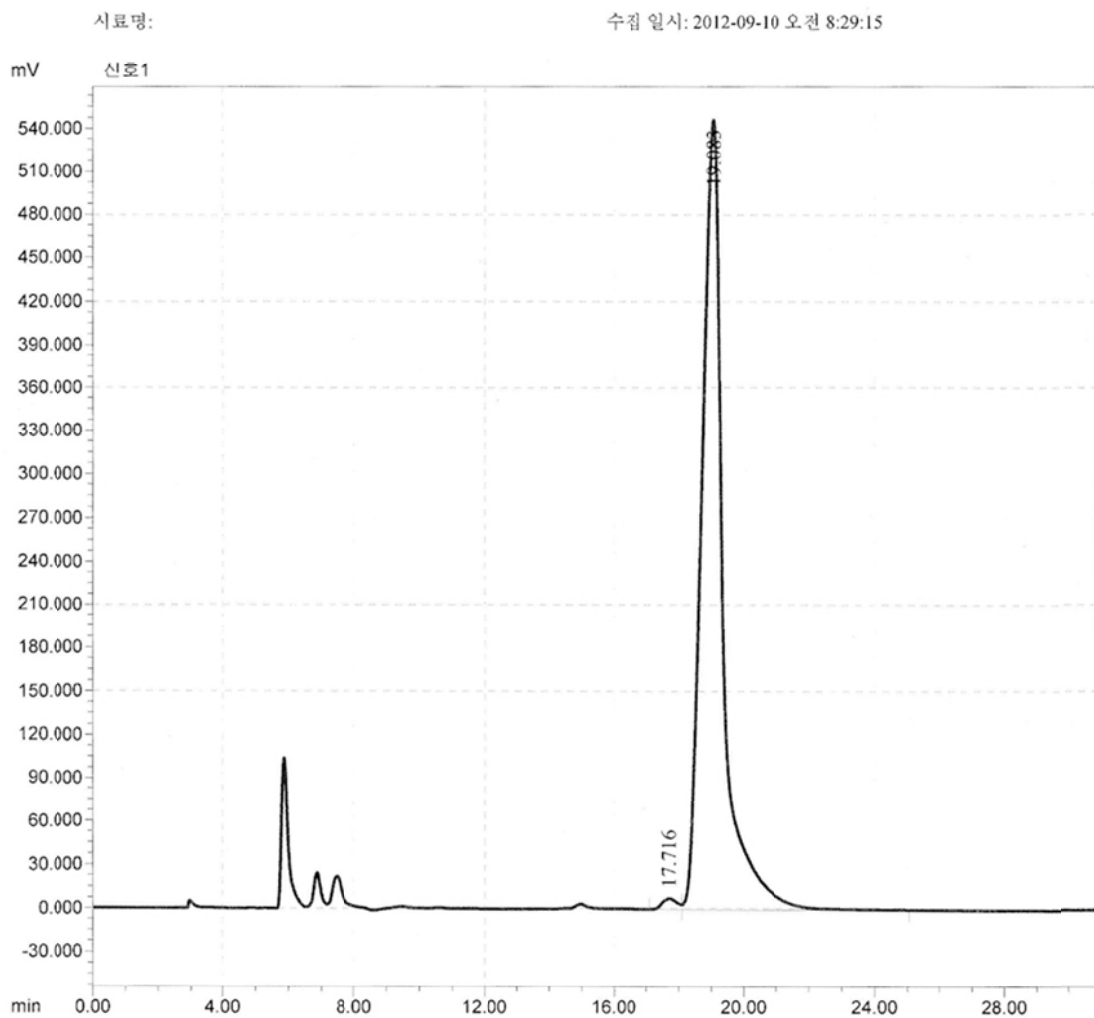

|            | 머무름 시간<br>[min] | 면적<br>[uV <sup>2</sup> sec] | 면적%<br>[%] | 표지 |
|------------|-----------------|-----------------------------|------------|----|
| $\Delta^2$ | 17.716          | 234982.79                   | 0.945      | BV |
| $\Delta^2$ | 19.083          | 24625759.72                 | 99.055     | VB |
| $\Sigma$   |                 | 24860742.51                 | 100.000    |    |

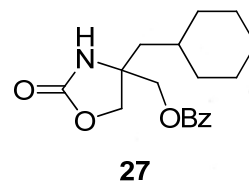

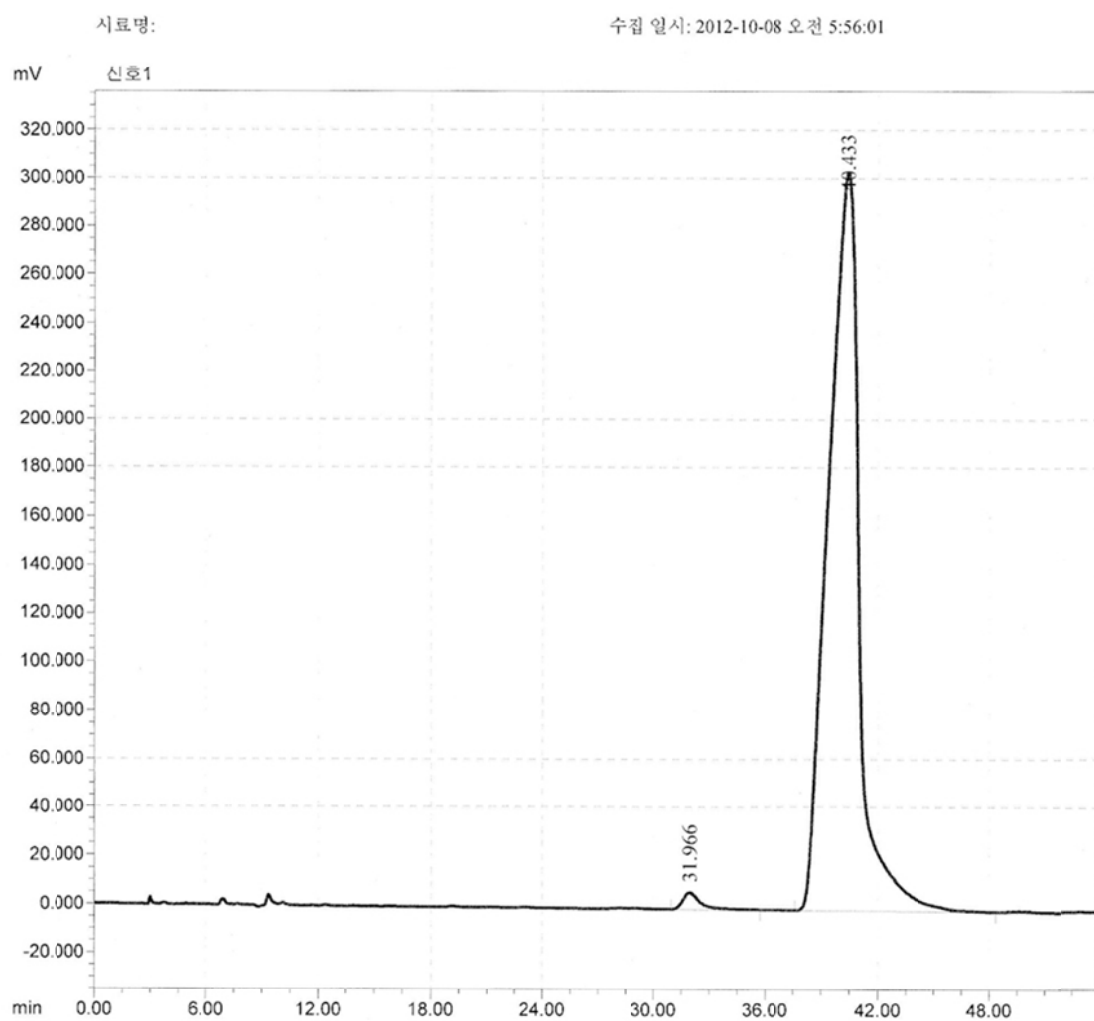

|            | 머무름 시간<br>[min] | 면적<br>[uV*sec] | 면적% 표지<br>[%] |
|------------|-----------------|----------------|---------------|
| $\Delta^?$ | 31.966          | 439279.23      | 1.251 BB      |
| $\Delta^?$ | 40.433          | 34661166.82    | 98.749 BB     |
| $\Sigma$   |                 | 35100446.05    | 100.000       |

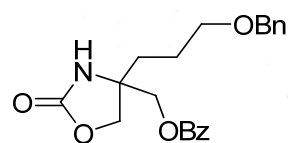

**28**

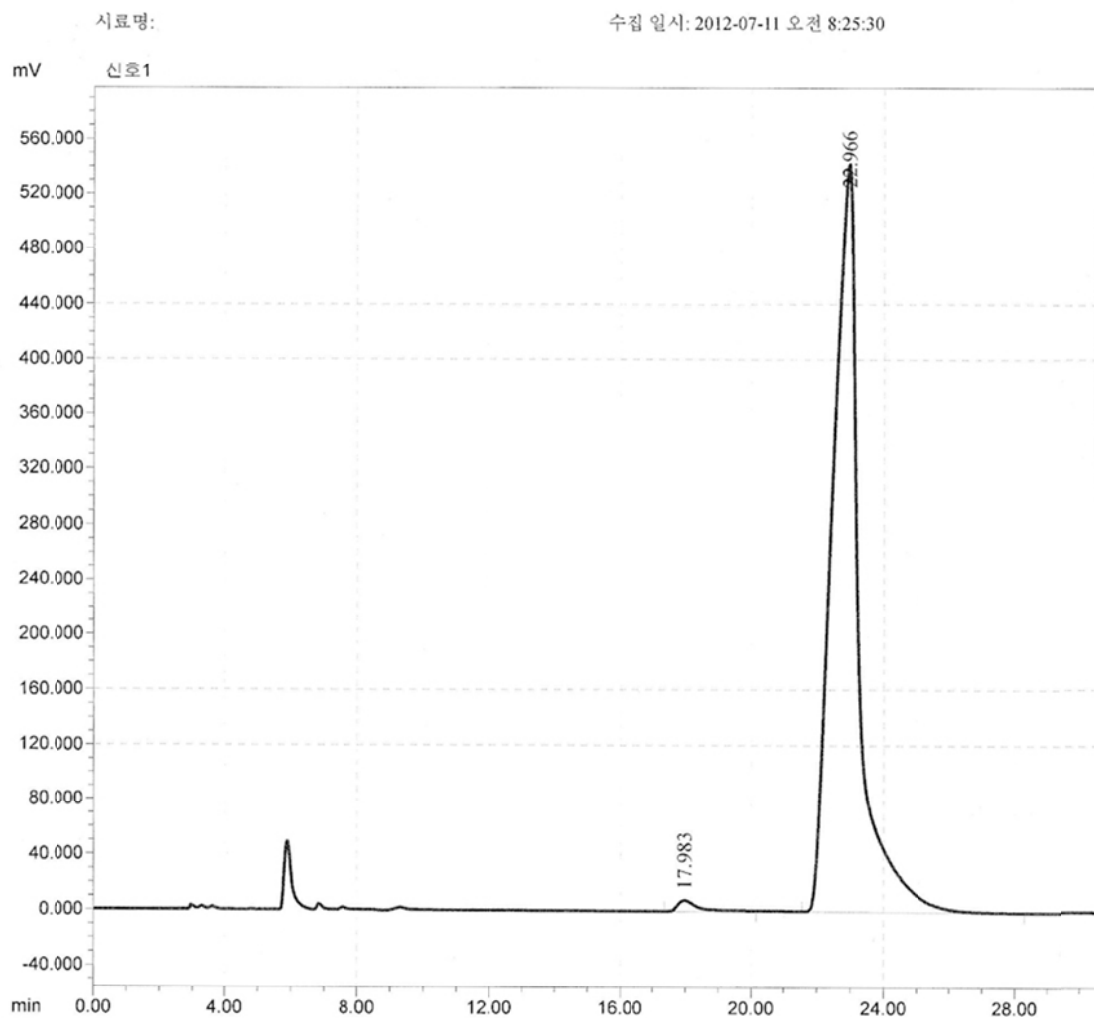

|            | 머무름 시간<br>[min] | 면적<br>[uV*sec] | 면적%<br>[%] | 표지 |
|------------|-----------------|----------------|------------|----|
| $\Delta^?$ | 17.983          | 318503.68      | 1.040      | BB |
| $\Delta^?$ | 22.966          | 30306135.96    | 98.960     | BB |
| $\Sigma$   |                 | 30624639.64    | 100.000    |    |

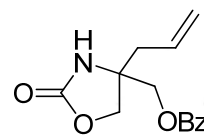

**29**



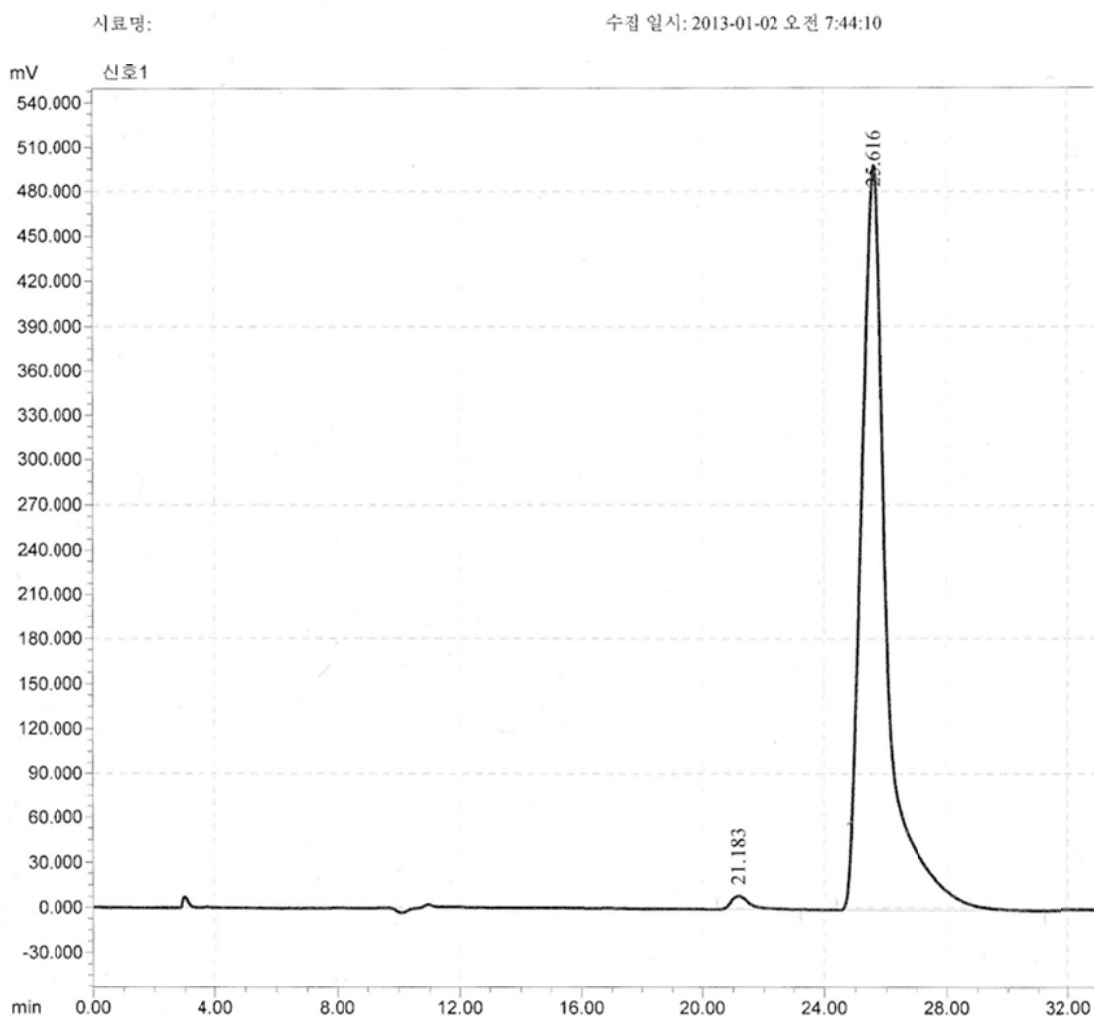

|            | 머무름 시간<br>[min] | 면적<br>[uV*sec] | 면적% 표지<br>[%] |
|------------|-----------------|----------------|---------------|
| $\Delta^2$ | 21.183          | 385567.90      | 1.340 BB      |
| $\Delta^2$ | 25.616          | 28377737.94    | 98.660 BV     |
| $\Sigma$   |                 | 28763305.84    | 100.000       |

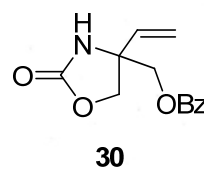

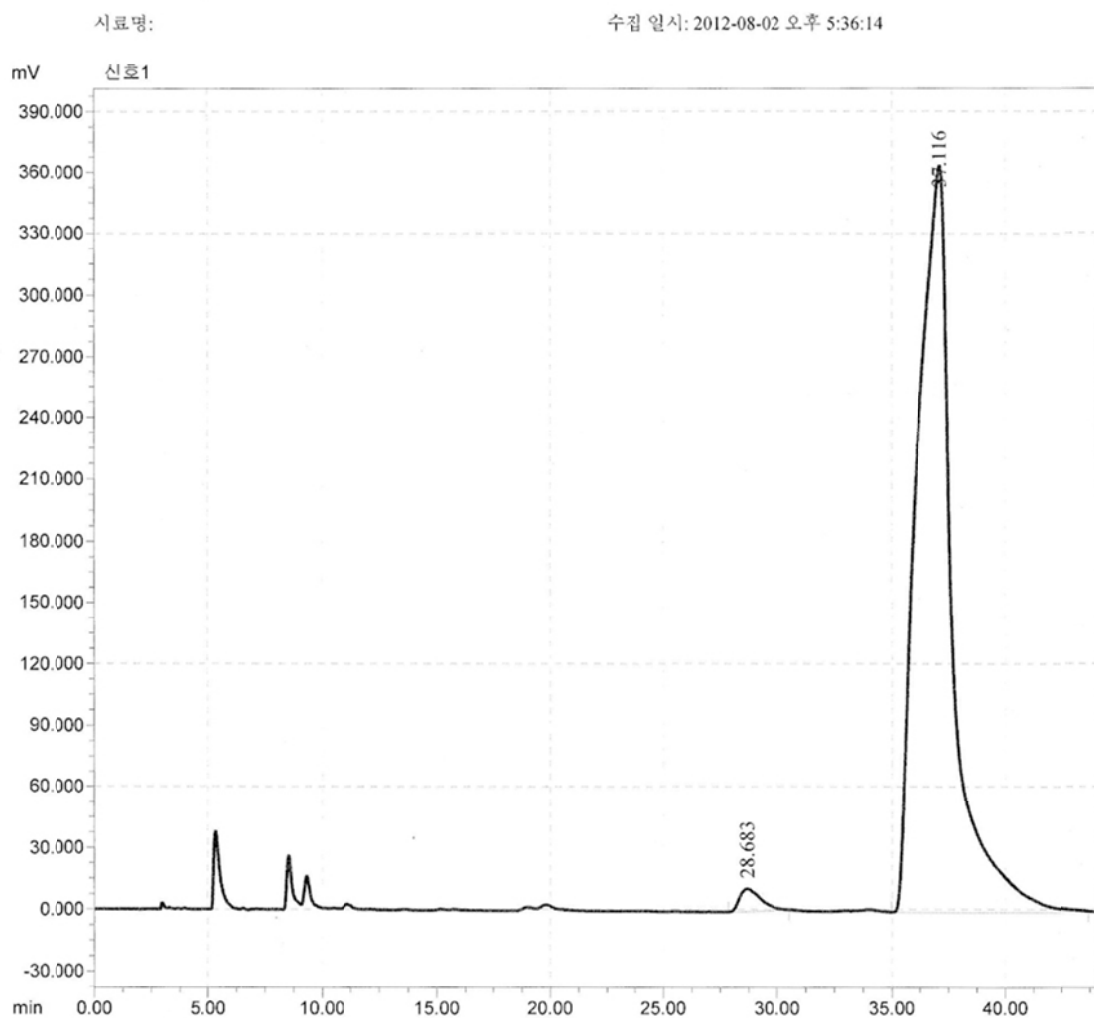

|            | 머무름 시간<br>[min] | 면적<br>[uV*sec] | 면적% 표지<br>[%] |
|------------|-----------------|----------------|---------------|
| $\Delta^2$ | 28.683          | 698479.24      | 1.722 BB      |
| $\Delta^2$ | 37.116          | 39852222.57    | 98.278 BB     |
| $\Sigma$   |                 | 40550701.81    | 100.000       |

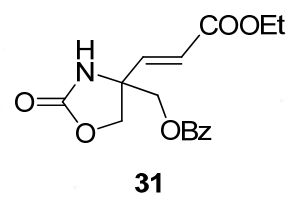

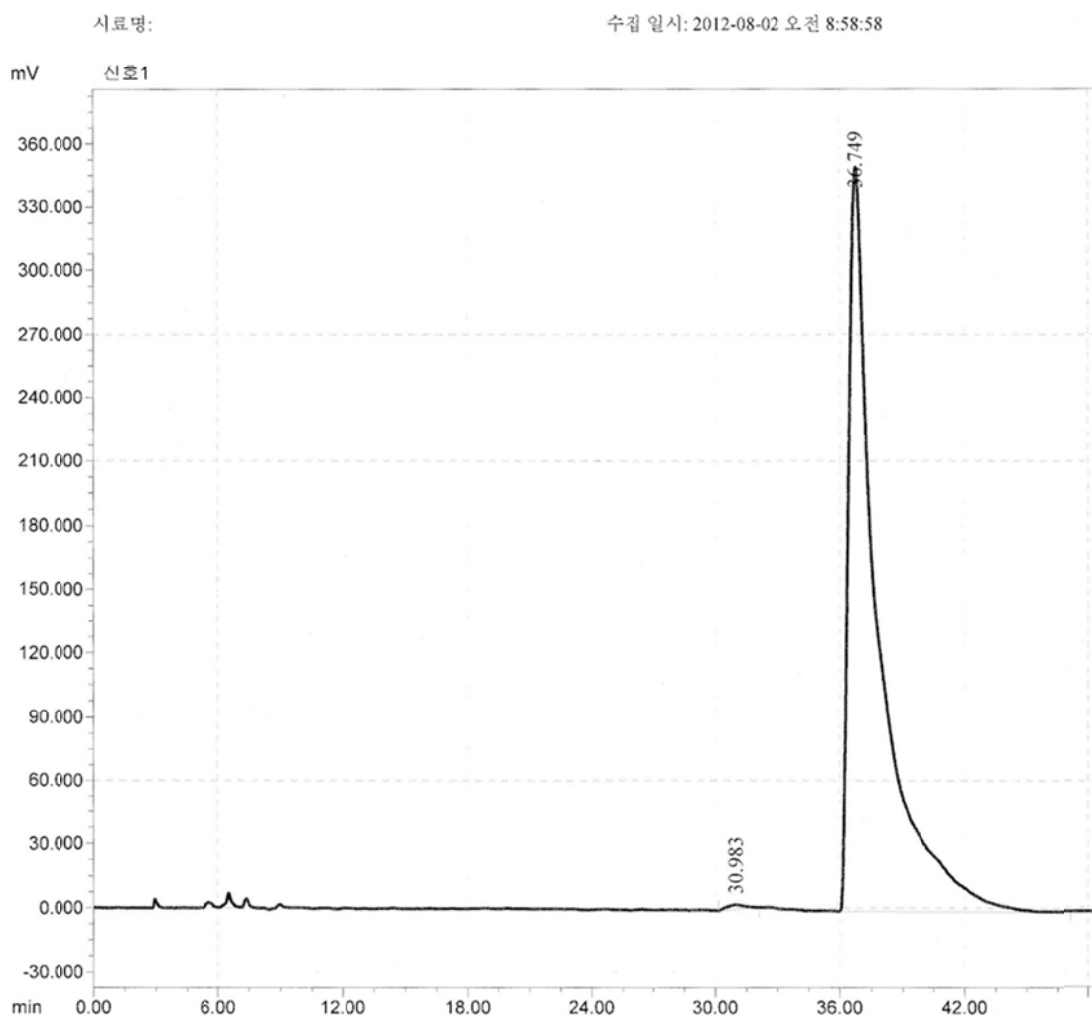

|            | 머무름 시간<br>[min] | 면적<br>[uV <sup>2</sup> sec] | 면적%<br>[%] | 표지 |
|------------|-----------------|-----------------------------|------------|----|
| $\Delta^?$ | 30.983          | 129688.25                   | 0.380      | BB |
| $\Delta^?$ | 36.749          | 33983620.58                 | 99.620     | BB |
| $\Sigma$   |                 | 34113308.83                 | 100.000    |    |

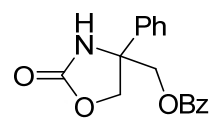

**32**

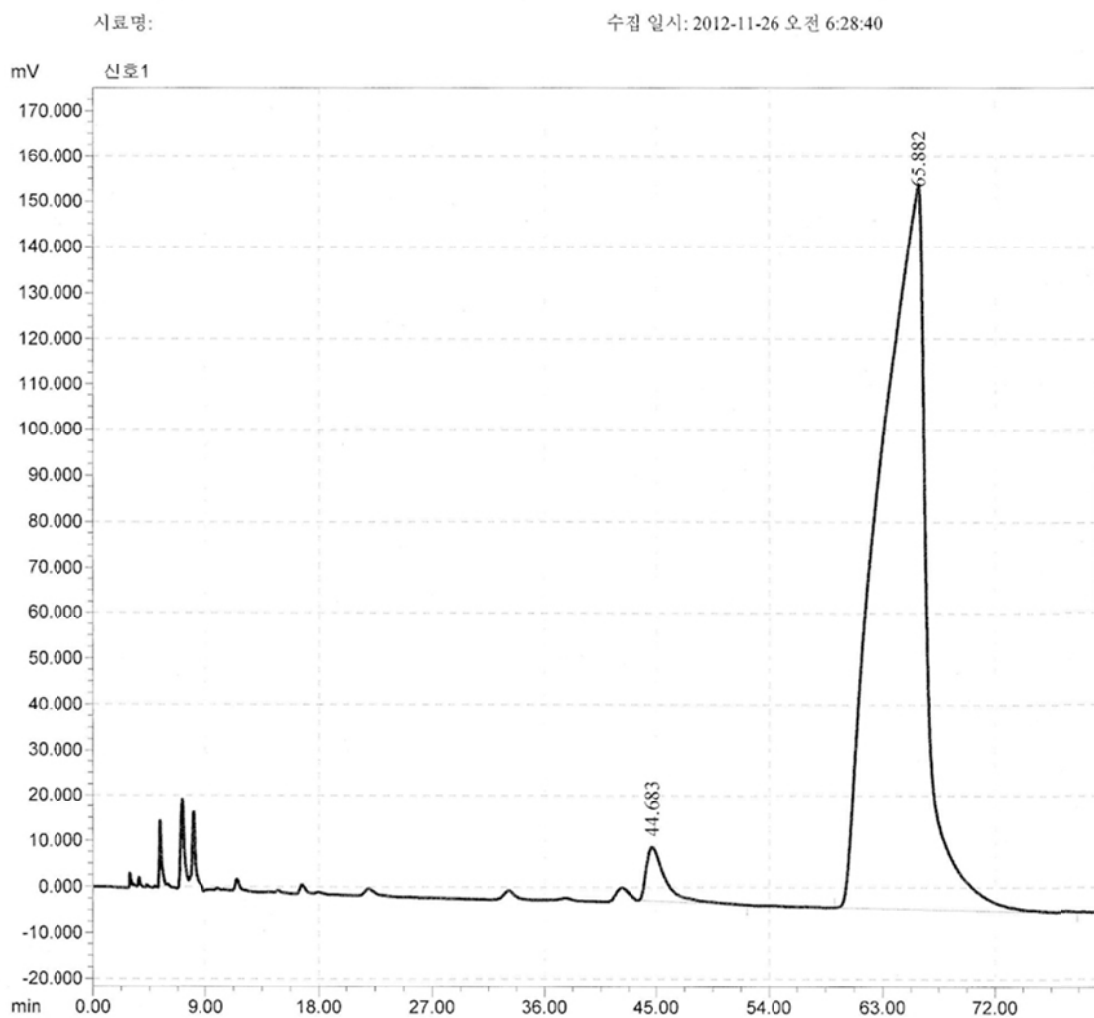

|            | 머무름 시간<br>[min] | 면적<br>[uV*sec] | 면적% 표지<br>[%] |
|------------|-----------------|----------------|---------------|
| $\Delta^2$ | 44.683          | 1183391.15     | 2.756 BB      |
| $\Delta^2$ | 65.882          | 41756436.82    | 97.244 BB     |
| $\Sigma$   |                 | 42939827.98    | 100.000       |

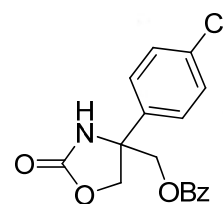

33

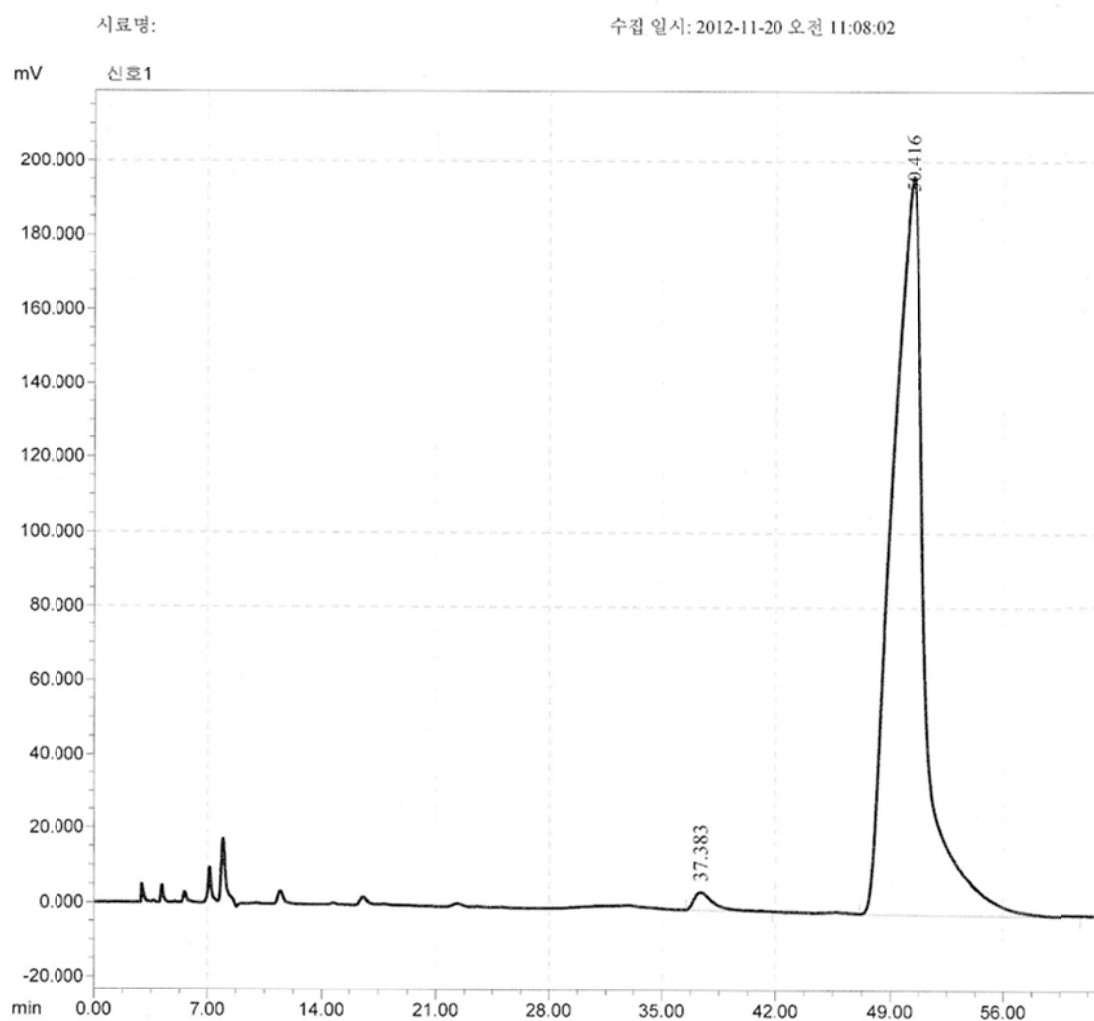

|            | 머무름 시간<br>[min] | 면적<br>[uV*sec] | 면적% 표지<br>[%] |
|------------|-----------------|----------------|---------------|
| $\Delta^2$ | 37.383          | 394799.98      | 1.387 BB      |
| $\Delta^2$ | 50.416          | 28074606.75    | 98.613 BB     |
| $\Sigma$   |                 | 28469406.72    | 100.000       |

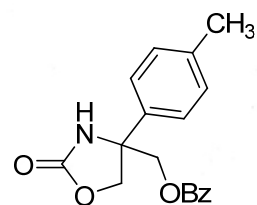

34

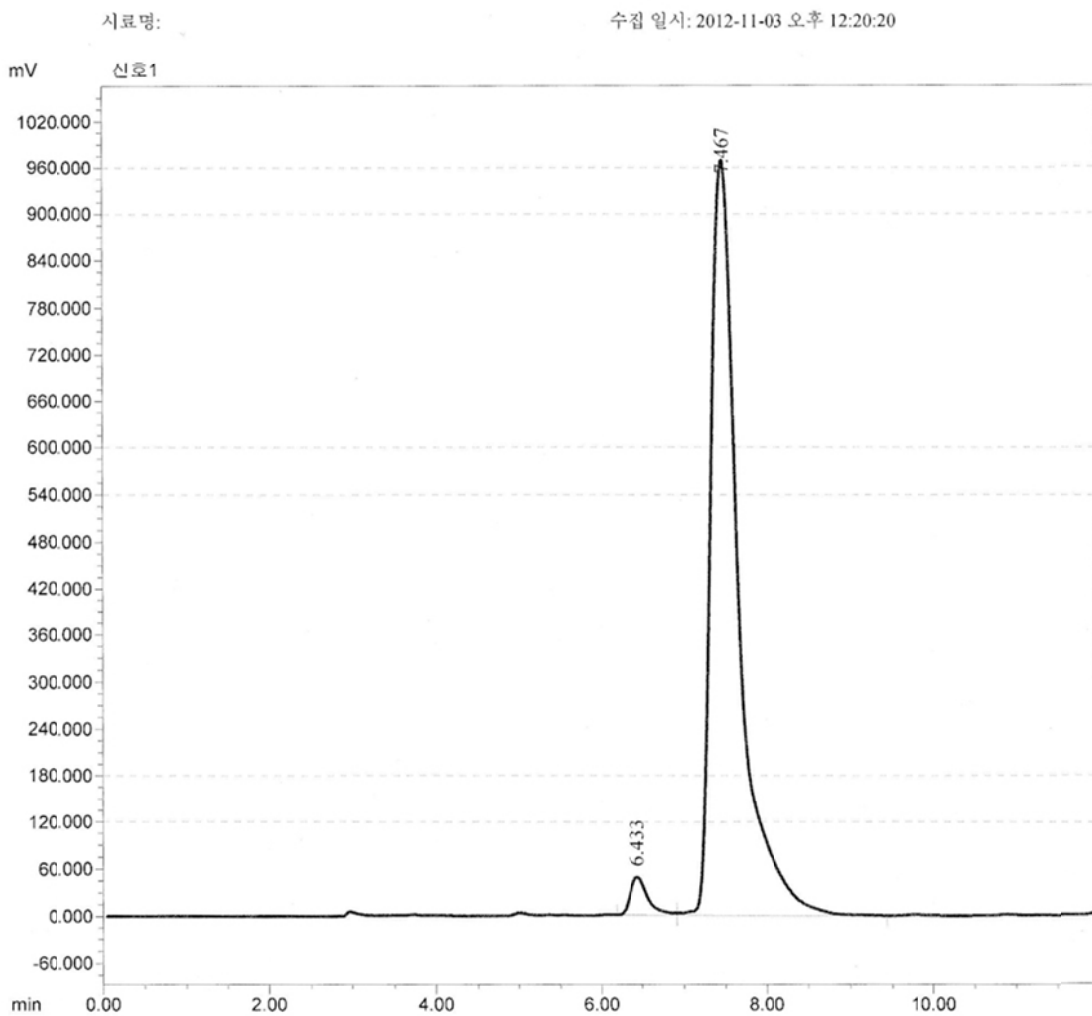

|            | 머무름 시간<br>[min] | 면적<br>[uV*sec] | 면적% 표지<br>[%] |
|------------|-----------------|----------------|---------------|
| $\Delta^2$ | 6.433           | 706855.40      | 3.066 BV      |
| $\Delta^2$ | 7.467           | 22347072.97    | 96.934 VB     |
| $\Sigma$   |                 | 23053928.38    | 100.000       |

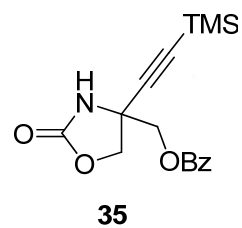

## VI. Spectral Data of the Oxazolidinone Benzoates 11 and 24–35 Prepared from the Consecutive Asymmetric Desymmetrization and Kinetic Resolution

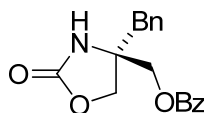

11

$^1\text{H}$  NMR (400 MHz,  $\text{CDCl}_3$ )  $\delta$  8.02 – 7.95 (m, 2H), 7.57 – 7.50 (m, 1H), 7.40 (t,  $J = 7.8$  Hz, 2H), 7.34 – 7.23 (m, 3H), 7.22 – 7.15 (m, 2H), 6.52 (s, 1H), 4.32 – 4.26 (m, 3H), 4.19 (d,  $J = 11.4$  Hz, 1H), 3.05 (d,  $J = 13.9$  Hz, 1H), 2.96 (d,  $J = 13.8$  Hz, 1H).  $^{13}\text{C}$  NMR (100 MHz,  $\text{CDCl}_3$ )  $\delta$  166.13, 159.01, 134.06, 133.61, 130.24, 129.79, 129.15, 129.00, 128.67, 127.68, 71.27, 67.43, 60.35, 41.92.  $[\alpha]_{\text{D}}^{14} = +15.6$  (0.048 M in  $\text{CHCl}_3$ , 97.0% ee). HRMS (ESI)  $m/z$  calcd for  $\text{C}_{18}\text{H}_{17}\text{NNaO}_4$   $[\text{M}+\text{Na}]^+$ , 334.1050; found, 334.1065.

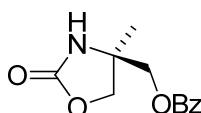

24

$^1\text{H}$  NMR (400 MHz,  $\text{CDCl}_3$ )  $\delta$  8.02 – 7.95 (m, 2H), 7.54 (tt,  $J = 7.2, 1.2$  Hz, 1H), 7.41 (t,  $J = 7.7$  Hz, 2H), 6.23 (s, 1H), 4.36 (d,  $J = 8.7$  Hz, 1H), 4.31 (d,  $J = 11.4$  Hz, 1H), 4.17 (d,  $J = 11.5$  Hz, 1H), 4.12 (d,  $J = 8.8$  Hz, 1H), 1.43 (s, 3H).  $^{13}\text{C}$  NMR (100 MHz,  $\text{CDCl}_3$ )  $\delta$  166.27, 159.00, 133.65, 129.86, 129.27, 128.72, 73.26, 68.89, 57.42, 23.11.  $[\alpha]_{\text{D}}^{14} = +6.9$  (0.042 M in  $\text{CHCl}_3$ , 96.5% ee). HRMS (ESI)  $m/z$  calcd for  $\text{C}_{12}\text{H}_{13}\text{NNaO}_4$   $[\text{M}+\text{Na}]^+$ , 258.0737; found, 258.0735.

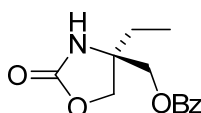

25

$^1\text{H}$  NMR (400 MHz,  $\text{CDCl}_3$ )  $\delta$  7.99 (ddd,  $J = 8.6, 1.6, 0.8$  Hz, 2H), 7.58 – 7.51 (m, 1H), 7.42 (ddt,  $J = 8.6, 6.9, 0.8$  Hz, 2H), 6.16 (s, 1H), 4.37 – 4.29 (m, 2H), 4.23 – 4.15 (m, 2H), 1.82 –

1.64 (m, 2H), 1.01 (td,  $J = 7.6, 0.9$  Hz, 3H).  $^{13}\text{C}$  NMR (100 MHz,  $\text{CDCl}_3$ )  $\delta$  166.30, 159.24, 133.66, 129.85, 129.26, 128.72, 71.33, 67.68, 60.39, 28.73, 7.67.  $[\alpha]_{\text{D}}^{14} = +2.4$  (0.060 M in  $\text{CHCl}_3$ , 98.3% ee). HRMS (ESI)  $m/z$  calcd for  $\text{C}_{13}\text{H}_{15}\text{NNaO}_4$   $[\text{M}+\text{Na}]^+$ , 272.0893; found, 272.0891.

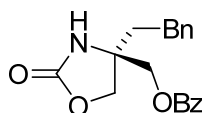

**26**

$^1\text{H}$  NMR (400 MHz,  $\text{CDCl}_3$ )  $\delta$  8.02 – 7.96 (m, 2H), 7.57 – 7.50 (m, 1H), 7.40 (t,  $J = 7.8$  Hz, 2H), 7.31 – 7.23 (m, 2H), 7.22 – 7.13 (m, 3H), 6.77 (s, 1H), 4.39 (d,  $J = 11.5$  Hz, 1H), 4.33 (d,  $J = 9.0$  Hz, 1H), 4.26 (d,  $J = 11.5$  Hz, 1H), 4.21 (d,  $J = 9.0$  Hz, 1H), 2.73 (dd,  $J = 9.4, 7.5$  Hz, 2H), 2.11 – 1.91 (m, 2H).  $^{13}\text{C}$  NMR (100 MHz,  $\text{CDCl}_3$ )  $\delta$  166.24, 159.46, 140.35, 133.63, 129.82, 129.17, 128.80, 128.69, 128.35, 126.54, 71.73, 67.81, 60.06, 37.74, 29.77.  $[\alpha]_{\text{D}}^{13} = +11.2$  (0.068 M in  $\text{CHCl}_3$ , 98.5% ee). HRMS (ESI)  $m/z$  calcd for  $\text{C}_{19}\text{H}_{19}\text{NNaO}_4$   $[\text{M}+\text{Na}]^+$ , 348.1206; found, 348.1212.

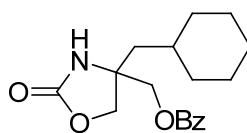

**27**

$^1\text{H}$  NMR (400 MHz,  $\text{CDCl}_3$ )  $\delta$  7.97 (dd,  $J = 8.4, 1.3$  Hz, 2H), 7.53 (ddt,  $J = 8.1, 7.0, 1.4$  Hz, 1H), 7.40 (dd,  $J = 8.3, 7.1$  Hz, 2H), 6.14 (s, 1H), 4.35 – 4.28 (m, 2H), 4.22 – 4.15 (m, 2H), 1.77 – 1.50 (m, 7H), 1.44 (ddq,  $J = 11.1, 5.9, 3.2, 2.7$  Hz, 1H), 1.23 (dddd,  $J = 16.3, 7.0, 4.2, 1.5$  Hz, 2H), 1.17 – 0.93 (m, 3H).  $^{13}\text{C}$  NMR (100 MHz,  $\text{CDCl}_3$ )  $\delta$  166.34, 159.16, 133.60, 129.83, 129.26, 128.71, 72.57, 68.21, 60.07, 43.76, 34.82, 34.62, 33.55, 26.24, 26.20, 26.02.  $[\alpha]_{\text{D}}^{14} = +5.8$  (0.063 M in  $\text{CHCl}_3$ , 98.1% ee). HRMS (ESI)  $m/z$  calcd for  $\text{C}_{18}\text{H}_{23}\text{NNaO}_4$   $[\text{M}+\text{Na}]^+$ , 340.1519; found, 340.1528.



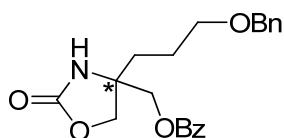

**28**

$^1\text{H}$  NMR (400 MHz,  $\text{CDCl}_3$ )  $\delta$  8.01 – 7.95 (m, 2H), 7.55 (ddt,  $J = 8.0, 7.0, 1.3$  Hz, 1H), 7.45 – 7.36 (m, 2H), 7.36 – 7.22 (m, 5H), 6.26 (s, 1H), 4.48 (s, 2H), 4.34 (d,  $J = 9.7$  Hz, 1H), 4.32 (d,  $J = 7.3$  Hz, 1H), 4.21 (d,  $J = 11.5$  Hz, 1H), 4.16 (d,  $J = 8.9$  Hz, 1H), 3.50 (td,  $J = 5.9, 2.1$  Hz, 2H), 1.92 – 1.62 (m, 4H).  $^{13}\text{C}$  NMR (100 MHz,  $\text{CDCl}_3$ )  $\delta$  166.12, 158.74, 137.93, 133.50, 129.70, 129.11, 128.58, 128.46, 127.76, 127.69, 73.12, 71.75, 69.55, 67.62, 59.58, 33.11, 23.80.  $[\alpha]_{\text{D}}^{21} = +13.6$  (0.041 M in  $\text{CHCl}_3$ , 97.5% ee). HRMS (ESI)  $m/z$  calcd for  $\text{C}_{21}\text{H}_{23}\text{NNaO}_5$   $[\text{M}+\text{Na}]^+$ , 392.1468; found, 392.1465.

---

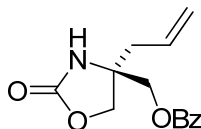

**29**

$^1\text{H}$  NMR (400 MHz,  $\text{CDCl}_3$ )  $\delta$  8.00 (ddt,  $J = 7.5, 1.3, 0.7$  Hz, 2H), 7.61 – 7.53 (m, 1H), 7.47 – 7.40 (m, 2H), 5.85 – 5.72 (m, 1H), 5.67 (s, 1H), 5.31 – 5.20 (m, 2H), 4.38 (dd,  $J = 11.7, 0.7$  Hz, 1H), 4.32 (dd,  $J = 8.9, 0.7$  Hz, 1H), 4.24 (dd,  $J = 3.1, 0.7$  Hz, 1H), 4.22 (dd,  $J = 5.7, 0.7$  Hz, 1H), 2.55 – 2.39 (m, 2H).  $^{13}\text{C}$  NMR (100 MHz,  $\text{CDCl}_3$ )  $\delta$  166.24, 158.61, 133.76, 130.15, 129.87, 129.18, 128.78, 121.75, 71.34, 67.54, 59.69, 40.63.  $[\alpha]_{\text{D}}^{29} = -2.5$  (0.076 M in  $\text{CHCl}_3$ , 97.9% ee). HRMS (ESI)  $m/z$  calcd for  $\text{C}_{14}\text{H}_{15}\text{NNaO}_4$   $[\text{M}+\text{Na}]^+$ , 284.0893; found, 284.0881.

---

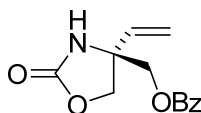

**30**

$^1\text{H}$  NMR (400 MHz,  $\text{CDCl}_3$ )  $\delta$  8.00 – 7.95 (m, 2H), 7.53 (ddt,  $J = 8.0, 7.0, 1.4$  Hz, 1H), 7.43 – 7.36 (m, 2H), 6.63 (s, 1H), 5.91 (dd,  $J = 17.3, 10.7$  Hz, 1H), 5.47 (d,  $J = 17.3$  Hz, 1H), 5.36 (d,  $J = 10.7$  Hz, 1H), 4.44 – 4.37 (m, 2H), 4.29 (d,  $J = 11.5$  Hz, 1H), 4.20 (d,  $J = 8.7$  Hz, 1H).  $^{13}\text{C}$  NMR (100 MHz,  $\text{CDCl}_3$ )  $\delta$  166.22, 159.26, 135.67, 133.65, 129.86, 129.15, 128.69, 117.74,

72.46, 67.52, 61.53.  $[\alpha]_D^{24} = -46.8$  (0.044 M in  $\text{CHCl}_3$ , 97.1% ee). HRMS (EI) calcd for  $\text{C}_{13}\text{H}_{13}\text{NNaO}_4$   $[\text{M}+\text{Na}]^+$ , 270.0737; found, 270.0733.

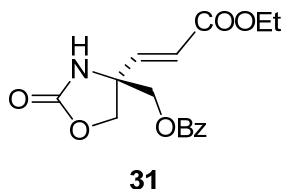

$^1\text{H}$  NMR (400 MHz,  $\text{CDCl}_3$ )  $\delta$  8.00 – 7.94 (m, 2H), 7.55 (ddt,  $J = 7.9, 6.9, 1.3$  Hz, 1H), 7.41 (dd,  $J = 8.4, 7.1$  Hz, 2H), 6.94 (d,  $J = 15.8$  Hz, 1H), 6.61 (s, 1H), 6.20 (d,  $J = 15.8$  Hz, 1H), 4.47 (d,  $J = 2.7$  Hz, 1H), 4.44 (s, 1H), 4.34 (d,  $J = 11.6$  Hz, 1H), 4.24 (d,  $J = 9.0$  Hz, 1H), 4.20 (q,  $J = 6.8$  Hz, 2H), 1.28 (t,  $J = 7.1$  Hz, 3H).  $^{13}\text{C}$  NMR (100 MHz,  $\text{CDCl}_3$ )  $\delta$  166.07, 165.43, 158.66, 143.61, 133.84, 129.91, 128.88, 128.76, 123.88, 71.75, 67.13, 61.29, 61.12, 14.28.  $[\alpha]_D^{15} = -45.7$  (0.063 M in  $\text{CHCl}_3$ , 96.5% ee). HRMS (ESI)  $m/z$  calcd for  $\text{C}_{16}\text{H}_{17}\text{NNaO}_6$   $[\text{M}+\text{Na}]^+$ , 342.0948; found, 342.0946.

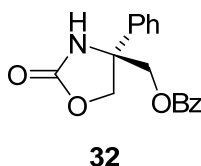

$^1\text{H}$  NMR (400 MHz,  $\text{CDCl}_3$ )  $\delta$  7.96 – 7.91 (m, 2H), 7.54 – 7.48 (m, 1H), 7.45 – 7.32 (m, 8H), 7.09 (s, 1H), 4.72 (d,  $J = 8.7$  Hz, 1H), 4.59 (d,  $J = 11.7$  Hz, 1H), 4.52 (d,  $J = 11.7$  Hz, 1H), 4.44 (d,  $J = 8.7$  Hz, 1H).  $^{13}\text{C}$  NMR (100 MHz,  $\text{CDCl}_3$ )  $\delta$  166.15, 159.36, 139.25, 133.48, 129.72, 129.27, 128.95, 128.65, 128.53, 124.87, 73.83, 69.18, 63.16.  $[\alpha]_D^{13} = -57.3$  (0.067 M in  $\text{CHCl}_3$ , 99.2% ee). HRMS (ESI)  $m/z$  calcd for  $\text{C}_{17}\text{H}_{15}\text{NNaO}_4$   $[\text{M}+\text{Na}]^+$ , 320.0893; found, 320.0899.

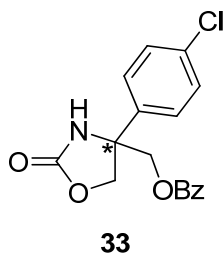

$^1\text{H}$  NMR (400 MHz,  $\text{CDCl}_3$ )  $\delta$  7.95 – 7.90 (m, 2H), 7.52 (ddt,  $J = 7.9, 7.0, 1.2$  Hz, 1H), 7.41 – 7.33 (m, 4H), 7.32 – 7.26 (m, 2H), 7.20 (d,  $J = 2.1$  Hz, 1H), 4.69 (dd,  $J = 8.7, 0.9$  Hz, 1H), 4.53 (t,  $J = 1.1$  Hz, 2H), 4.39 (dd,  $J = 8.7, 0.9$  Hz, 1H).  $^{13}\text{C}$  NMR (100 MHz,  $\text{CDCl}_3$ )  $\delta$  166.21, 159.38, 137.97, 134.89, 133.75, 129.86, 129.62, 128.94, 128.72, 128.23, 127.55, 127.46, 126.56, 73.82, 68.98, 63.05.  $[\alpha]_{\text{D}}^{26} = -32.0$  (0.090 M in  $\text{CHCl}_3$ , 94.5% ee). HRMS (ESI)  $m/z$  calcd for  $\text{C}_{17}\text{H}_{14}\text{ClNNaO}_4$   $[\text{M}+\text{Na}]^+$ , 354.0504; found, 354.0507.

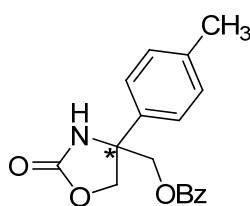

**34**

$^1\text{H}$  NMR (400 MHz,  $\text{CDCl}_3$ )  $\delta$  7.97 – 7.91 (m, 2H), 7.51 (ddt,  $J = 7.6, 6.9, 1.4$  Hz, 1H), 7.36 (t,  $J = 7.8$  Hz, 2H), 7.22 (d,  $J = 2.6$  Hz, 4H), 7.11 (s, 1H), 4.69 (d,  $J = 8.6$  Hz, 1H), 4.57 (d,  $J = 11.7$  Hz, 1H), 4.48 (d,  $J = 11.7$  Hz, 1H), 4.41 (d,  $J = 8.7$  Hz, 1H), 2.34 (s, 3H).  $^{13}\text{C}$  NMR (100 MHz,  $\text{CDCl}_3$ )  $\delta$  166.30, 159.56, 138.63, 136.40, 133.58, 130.02, 129.86, 129.14, 128.65, 124.91, 74.08, 69.33, 63.10, 21.18.  $[\alpha]_{\text{D}}^{28} = -35.9$  (0.077 M in  $\text{CHCl}_3$ , 97.2% ee). HRMS (ESI)  $m/z$  calcd for  $\text{C}_{18}\text{H}_{17}\text{NNaO}_4$   $[\text{M}+\text{Na}]^+$ , 334.1050; found, 334.1052.

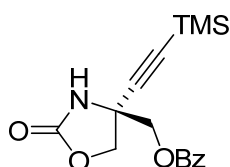

**35**

$^1\text{H}$  NMR (400 MHz,  $\text{CDCl}_3$ )  $\delta$  8.03 – 7.97 (m, 2H), 7.56 (ddt,  $J = 8.0, 7.0, 1.3$  Hz, 1H), 7.46 – 7.39 (m, 2H), 5.77 (s, 1H), 4.54 – 4.49 (m, 2H), 4.46 (d,  $J = 8.7$  Hz, 1H), 4.33 (d,  $J = 11.5$  Hz, 1H), 0.14 (s, 9H).  $^{13}\text{C}$  NMR (100 MHz,  $\text{CDCl}_3$ )  $\delta$  166.00, 157.80, 133.78, 129.94, 129.06, 128.73, 100.42, 93.11, 72.64, 67.61, 55.19,  $-0.32$ .  $[\alpha]_{\text{D}}^{27} = +25.5$  (0.063 M in  $\text{CHCl}_3$ , 93.9% ee). HRMS (ESI)  $m/z$  calcd for  $\text{C}_{16}\text{H}_{19}\text{NNaO}_4\text{Si}$   $[\text{M}+\text{Na}]^+$ , 340.0976; found, 340.0968.

## VII. Determination of the Absolute Configuration of the Oxazolidinone Benzoates 11 and 24-35

### 1) The oxazolidinone benzoate **11**

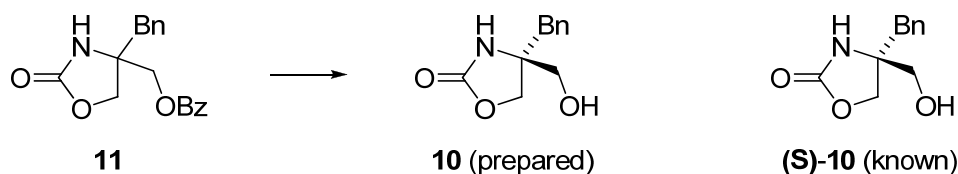

To **11** (31 mg, 0.10 mmol) in MeOH (1 mL) was added  $K_2CO_3$  (5 mg) at  $-20^\circ C$  and the mixture was stirred at that temperature for a day. The resulting solution was directly loaded on a silica gel column, and eluted with EtOAc/hexane (1/3) and then 5% MeOH in  $CH_2Cl_2$  to afford the alcohol **10** (19 mg, 91% yield).  $[\alpha]_D^{22}$  of **10** =  $-23.0$  ( $c$  0.4,  $CHCl_3$ , measured, 95.5% ee) vs  $[\alpha]_D^{26}$  of (*S*)-**10** =  $-24.3$  ( $c$  0.4,  $CHCl_3$ , known, >99% ee).<sup>16</sup> It was determined that the major enantiomers of our synthetic **10** and **11** have (*S*)-configurations, respectively.

### 2) The oxazolidinone benzoate **24**

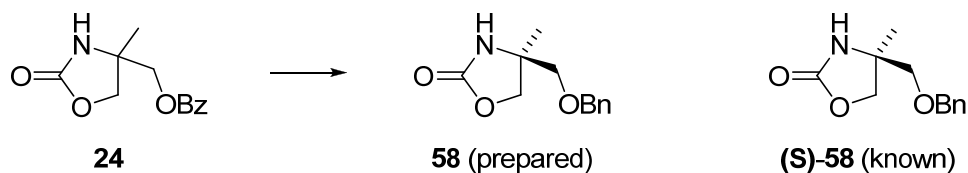

To **24** (12 mg, 0.051 mmol) in MeOH (1 mL) was added  $K_2CO_3$  (5 mg) at  $-20^\circ C$  and the mixture was stirred at that temperature for a day. The resulting solution was directly loaded on a silica gel column, and eluted with EtOAc/hexane (1/3) and then 5% MeOH in  $CH_2Cl_2$  to furnish the corresponding alcohol (6.3 mg, 94% yield). The alcohol (6.3 mg, 0.048 mmol) was dissolved in a mixture of THF (2 mL) and DMF (0.5 mL), and then tetra-*n*-butylammonium iodide (1 mg), benzyl chloride (9  $\mu L$ , 0.070 mmol) and NaH (60% dispersion in mineral oil, 4 mg, 0.10 mmol) were added sequentially in an ice-water bath. The mixture was stirred at that temperature for 2 hours and then at room temperature for 10 hours. After quenching the reaction with saturated aqueous  $NH_4Cl$  (1 mL), the normal work-up with EtOAc (2 mL, three times) and column chromatography (EtOAc/hexane = 1/3, then 1/1) gave the benzyl ether **58** (4.5 mg, 42% yield, 95% ee). The HPLC retention time of the major enantiomer of **58** (6.2 minutes, measured) was identical with that of (*S*)-**58** (6.2 minutes,

known) using a chiral column DAICEL OD with 30% *i*-PrOH in hexane as an eluent and a flow rate of 1.0 mL/min.<sup>17</sup> That of the minor enantiomer was found to be 9.0 minutes, which is the reported value of (*R*)-**58**. It was determined that the major enantiomers of our synthetic **58** and **24** have (*S*)-configurations, respectively.

### 3) The oxazolidinone benzoate **30**

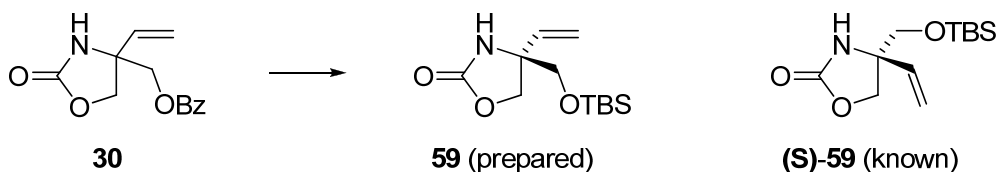

To **30** (48.4 mg, 0.20 mmol) in MeOH (1 mL) was added K<sub>2</sub>CO<sub>3</sub> (5 mg) at -20°C and the mixture was stirred at that temperature for a day. The resulting solution was directly loaded on a silica gel column, and eluted with EtOAc/hexane (1/3) and then 5% MeOH in CH<sub>2</sub>Cl<sub>2</sub> to afford the corresponding alcohol (27.5 mg, 96% yield). Imidazole (38.8 mg, 0.57 mmol) and TBSCl (57.3 mg, 0.38 mmol) were added to the alcohol (27.5 mg, 0.19 mmol) in an ice-water bath in sequence, and subsequently the resulting solution was stirred at that temperature for an hour and then at room temperature for a day. After quenching the reaction with saturated aqueous NH<sub>4</sub>Cl (1 mL), the normal work-up with EtOAc (2 mL, three times) and chromatographic purification (EtOAc/hexane = 1/10, then 1/5) delivered the silyl ether **59** (39.6 mg, 81% yield). [α]<sub>D</sub><sup>23</sup> of **59** = -69.3 (*c* 0.48, CHCl<sub>3</sub>, measured) vs [α]<sub>D</sub><sup>20</sup> of (*S*)-**59** = +66.6 (*c* 0.36, CHCl<sub>3</sub>, known, >99% ee).<sup>18</sup> It was determined that the major enantiomers of our synthetic **59** and **30** have (*R*)- and (*S*)-configuration, respectively.

### 4) The oxazolidinone benzoate **25**

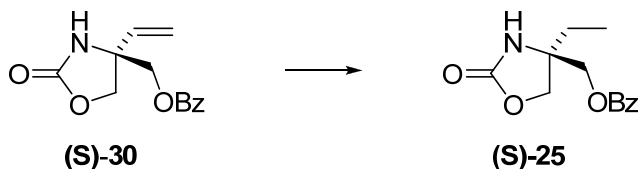

To **30** (10 mg, 0.04 mmol) in EtOAc (1 mL) was added 10% Pd/C (3 mg) and the mixture was stirred under an atmospheric hydrogen balloon at room temperature for 4 hours. The resulting solution was filtered through celite (1.5 g) with EtOAc (6 mL) and evaporated in vacuo. The residue was separated chromatographically (EtOAc/hexane = 1/3, then 1/1) to

give rise to **25** (9.9 mg, 99% yield, 98% ee). Since its chiral HPLC chromatogram was identical with that of **25** prepared from **13** by consecutive desymmetrization and kinetic resolution, the major enantiomer of **25** was determined to have (*S*)-configuration.

5) The oxazolidinone benzoates **26** and **31**

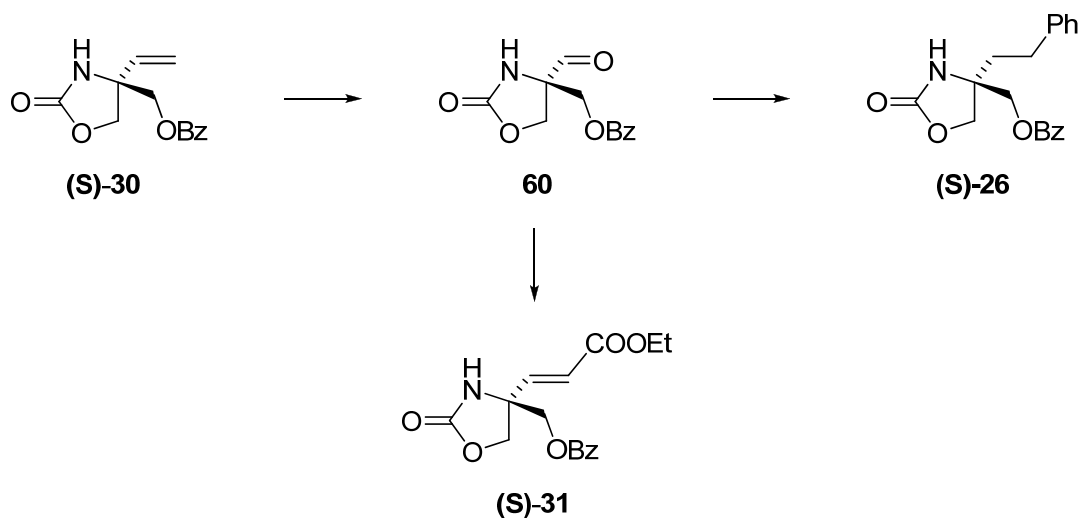

To (*S*)-**30** (20 mg, 0.081 mmol) in a 4 to 1 mixture of THF and water (2.5 mL) were added  $\text{NaIO}_4$  (173 mg, 0.81 mmol) and  $\text{OsO}_4$  (3 mg) in an ice-water bath, and the mixture was stirred at room temperature for 12 hours. After quenching the reaction with saturated aqueous  $\text{Na}_2\text{SO}_3$  (1 mL), the normal work-up with EtOAc (3 mL, three times) and chromatographic purification (EtOAc/hexane = 1/1, then 5% MeOH in  $\text{CH}_2\text{Cl}_2$ ) produced the aldehyde **60** (19.3 mg, 96% yield). To benzyltriphenylphosphonium chloride (94 mg, 0.24 mmol) in THF (2 mL) was injected KHMDS (0.5 M in toluene, 0.48 mL, 0.24 mmol) at 0°C, the mixture was stirred at that temperature for 30 minutes, and cooled down to  $-78^\circ\text{C}$ . The aldehyde **60** (20 mg, 0.08 mmol) was added to the cooled ylid and stirred at that temperature for 2 hours. The reaction was quenched with saturated aqueous  $\text{NH}_4\text{Cl}$  (1 mL), and the following normal work-up with EtOAc (2 mL, three times) and chromatographic separation (EtOAc/hexane = 1/3) provided the corresponding alkenes (23.8 mg, 92% yield). To the alkenes (23.8 mg, 0.074 mmol) in EtOAc (1 mL) was added 10% Pd/C (2 mg) and the mixture was stirred under an atmospheric hydrogen balloon at room temperature for 4 hours. The resulting solution was filtered through celite (1.5 g) with EtOAc (6 mL) and evaporated in vacuo. The residue was separated chromatographically (EtOAc/hexane = 1/3, then 1/1) to procure (*S*)-**26** (23.4 mg, 97% yield, 97% ee). Since its chiral HPLC chromatogram was identical with that of **26** prepared from **14**

by consecutive desymmetrization and kinetic resolution, the major enantiomer of **26** was determined to have (*S*)-configuration.

To the aldehyde **60** (19.3 mg, 0.077 mmol) in CH<sub>2</sub>Cl<sub>2</sub> (1 mL) was added (carbethoxymethylene)triphenylphosphorane (53.5 mg, 0.154 mmol) and the mixture was stirred at room temperature for 4 hours. The subsequent normal work-up with EtOAc (2 mL, three times) and chromatographic purification (EtOAc/hexane = 1/3, then 1/1) rendered (*S*)-**31** (22.2 mg, 91% yield, 93.5% ee). Since its chiral HPLC chromatogram was identical with that of **31** prepared from **19** by consecutive desymmetrization and kinetic resolution, the major enantiomer of **31** was determined to have (*S*)-configuration.

#### 6) The oxazolidinone benzoate **28**

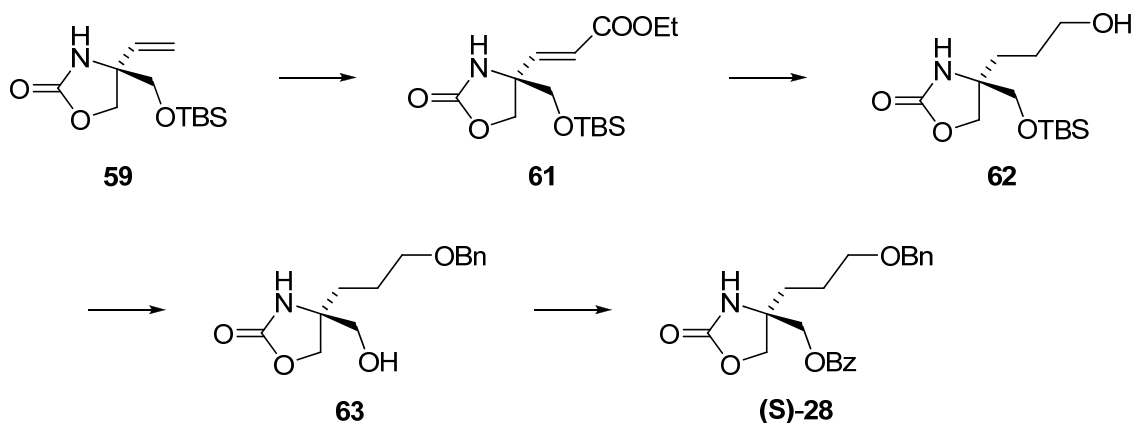

To **59** (20 mg, 0.081 mmol) in a 4 to 1 mixture of THF and water (2.5 mL) were NaIO<sub>4</sub> (173 mg, 0.809 mmol) and OsO<sub>4</sub> (3 mg) in an ice-water bath, and the mixture was stirred at room temperature for 12 hours. After quenching the reaction with saturated aqueous Na<sub>2</sub>SO<sub>3</sub> (1 mL), the normal work-up with EtOAc (3 mL, three times) and chromatographic purification (EtOAc/hexane = 1/1, then 5% MeOH in CH<sub>2</sub>Cl<sub>2</sub>) revealed the corresponding aldehyde (20 mg, 99% yield). To the aldehyde (20 mg, 0.080 mmol) in CH<sub>2</sub>Cl<sub>2</sub> (1 mL) was added (carbethoxymethylene)triphenylphosphorane (56 mg, 0.160 mmol) and the mixture was stirred at room temperature for 3 hours. The subsequent normal work-up with EtOAc (2 mL, three times) and chromatographic purification (EtOAc/hexane = 1/5, then 1/3) afforded **61** (25.1 mg, 97% yield). To **61** (25.1 mg, 0.078 mmol) in EtOAc (1 mL) was added 10% Pd/C (2 mg) and the mixture was stirred under an atmospheric hydrogen balloon at room temperature for 8 hours. The resulting solution was filtered through celite (1.5 g) with EtOAc

(6 mL) and evaporated in vacuo. The residue was separated chromatographically (EtOAc/hexane = 1/5, then 1/3) to furnish the corresponding saturated ester (25 mg, 99% yield). To the saturated ester (25 mg, 0.078 mmol) in THF (1.5 mL) was injected diisobutylaluminum hydride (1.0 M in THF, 0.18 mL, 0.18 mmol) at  $-78^{\circ}\text{C}$  and the mixture was stirred at that temperature for 8 hours. After quenching the reaction with saturated aqueous  $\text{NH}_4\text{Cl}$  (1 mL), the normal work-up with EtOAc (2 mL, three times) followed by the chromatographic separation (EtOAc/hexane = 1/3, then 1/1) to yield the alcohol **62** (19.8 mg, 89% yield). **62** (19.8 mg, 0.069 mmol) was dissolved in a mixture of THF (2 mL) and DMF (0.5 mL), and then tetra-*n*-butylammonium iodide (1 mg), benzyl chloride (16  $\mu\text{L}$ , 0.138 mmol) and NaH (60% dispersion in mineral oil, 4.2 mg, 0.104 mmol) were added sequentially in an ice-water bath. The mixture was stirred at that temperature for 2 hours and then at room temperature for 10 hours. After quenching the reaction with saturated aqueous  $\text{NH}_4\text{Cl}$  (2 mL), the normal work-up with  $\text{Et}_2\text{O}$  (2 mL, three times) and column chromatography (EtOAc/hexane = 1/7, then 1/3) gave the corresponding benzyl ether (18.2 mg, 69% yield). To the benzyl ether (18.2 mg, 0.047 mmol) in  $\text{CH}_2\text{Cl}_2$  (1 mL) was added TBAF (75 wt%, 0.1 mL) in an ice-water bath and the mixture was stirred at that temperature for an hour. After adding saturated aqueous  $\text{NH}_4\text{Cl}$  (1 mL), the normal work-up with EtOAc (2 mL, three times) and chromatographic purification (EtOAc/hexane = 1/1, then 5% MeOH in  $\text{CH}_2\text{Cl}_2$ ) gave the alcohol **63** (9.3 mg, 74% yield). To **63** (9.3 mg, 0.035 mmol) in  $\text{CH}_2\text{Cl}_2$  (1 mL) were added imidazole (9.5 mg, 0.14 mmol) and benzoyl chloride (8  $\mu\text{L}$ , 0.070 mmol) at room temperature, and the mixture was stirred at that temperature for 12 hours. After quenching the reaction with saturated aqueous  $\text{NH}_4\text{Cl}$  (1 mL), the normal work-up with EtOAc (2 mL, three times) followed by chromatographic separation (EtOAc/hexane = 1/3, then 1/1) to deliver (*S*)-**28** (11.5 mg, 89% yield, 96.8% ee). Since its chiral HPLC chromatogram was identical with that of **28** prepared from **16** by consecutive desymmetrization and kinetic resolution, the major enantiomer of **28** was determined to have (*S*)-configuration.



7) The oxazolidinone benzoate **29**

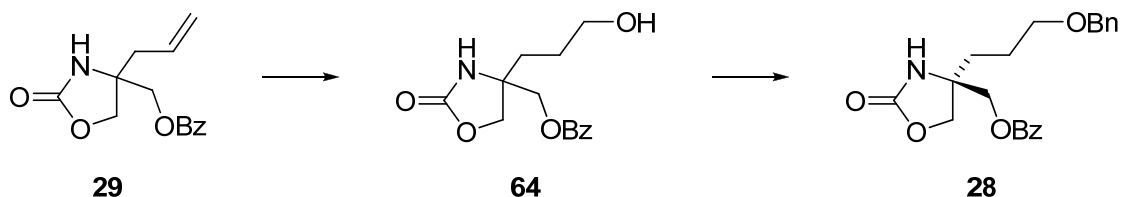

To **29** (13 mg, 0.05 mmol) in THF (1 mL) was injected 9-BBN (0.5 M in THF, 0.05 mL, 0.25 mmol) in an ice-water bath and the mixture was stirred at room temperature for 8 hours. The reaction was quenched with aqueous NaBO<sub>3</sub> solution (41 mg in 2 mL of water) in an ice-water bath and the resulting solution was stirred at that temperature for 12 hours. After adding saturated aqueous NH<sub>4</sub>Cl (1 mL) to the solution, all the volatile materials were evaporated in vacuo and the residue was purified chromatographically (EtOAc/hexane = 1/1, then 5% MeOH in CH<sub>2</sub>Cl<sub>2</sub>) to give the corresponding alcohol (12.8 mg, 92% yield). The alcohol (12.8 mg, 0.046 mmol) was dissolved in a mixture of THF (2 mL) and DMF (0.5 mL), and then tetra-*n*-butylammonium iodide (1 mg), benzyl chloride (11 μL, 0.092 mmol) and NaH (60% dispersion in mineral oil, 2.8 mg, 0.070 mmol) were added sequentially in an ice-water bath. The mixture was stirred at that temperature for 2 hours and then at room temperature for 10 hours. After quenching the reaction with saturated aqueous NH<sub>4</sub>Cl (2 mL), the normal work-up with Et<sub>2</sub>O (2 mL, three times) and column chromatography (EtOAc/hexane = 1/3, then 1/1) gave rise to the benzyl ether **28** (10.5 mg, 62% yield, 97.8% ee). Since its chiral HPLC chromatogram was identical with that of (*S*)-**28** prepared from **59** or **16** by consecutive desymmetrization and kinetic resolution, the major enantiomer of **29** was determined to have (*S*)-configuration.

8) The oxazolidinone benzoate **32**

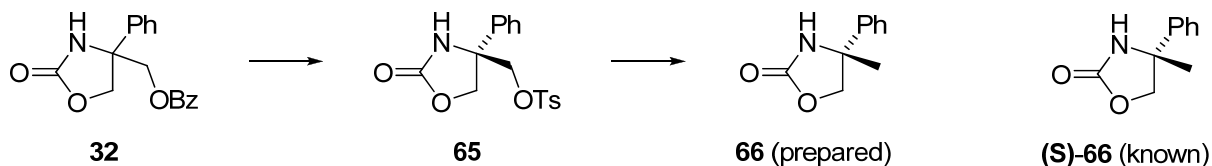

To **32** (15 mg, 0.05 mmol) in MeOH (1 mL) was added K<sub>2</sub>CO<sub>3</sub> (5 mg) at -20°C and the mixture was stirred at that temperature for a day. The resulting solution was directly loaded

on a silica gel column, and eluted with EtOAc/hexane (1/3) and then 5% MeOH in CH<sub>2</sub>Cl<sub>2</sub> to produce the corresponding alcohol (9.1 mg, 94% yield). To the alcohol (9.1 mg, 0.047 mmol) in CH<sub>2</sub>Cl<sub>2</sub> (1 mL) were added Et<sub>3</sub>N (20 μL, 0.141 mmol) and *p*-TsCl (27 mg, 0.141 mmol) in an ice-water bath, and the mixture was stirred at room temperature for 12 hours. After quenching the reaction with saturated aqueous NH<sub>4</sub>Cl (1 mL), the normal work-up with EtOAc (2 mL, three times) and the subsequent chromatographic separation (EtOAc/hexane = 1/5, then 1/1) provided the tosylate **65** (14.8 mg, 91% yield). To **65** (14.8 mg, 0.043 mmol) in acetone (1 mL) were added KI (35.7 mg, 0.215 mmol) and 18-crown-6 (1 mg) at room temperature, and the mixture was heated at reflux (80°C) for 12 hours. After adding 1 mL of water, the normal work-up with EtOAc (2 mL, three times) followed by chromatographic purification (EtOAc/hexane = 1/5, then 1/1) procured the corresponding iodide (9.4 mg, 72% yield). To the iodide (9.4 mg, 0.031 mmol) in *t*-BuOH (1 mL) and H<sub>2</sub>O (0.5 mL) was added Zn (20 mg, 0.31 mmol), and the mixture was heated at reflux (100°C) for 12 hours. After adding water (2 mL) to the solution at room temperature, the normal work-up with EtOAc (2 mL, three times) and chromatographic separation (EtOAc/hexane = 1/5, then 1/3) revealed **66** (4.1 mg, 75% yield).  $[\alpha]_D^{22}$  of **66** = -105.6 (*c* 0.2, EtOH, measured) vs  $[\alpha]_D^{25}$  of (*S*)-**66** = +107.2 (*c* 3, EtOH, known, >99% ee).<sup>19</sup> It was determined that the major enantiomers of our synthetic **66** and **32** have (*R*)- and (*S*)-configuration, respectively.

#### 9) The Oxazolidinone benzoate **35**

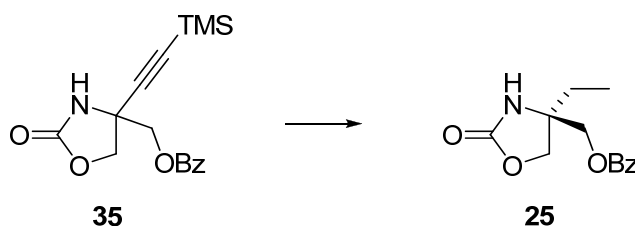

To **35** (14 mg, 0.044 mmol) in CH<sub>2</sub>Cl<sub>2</sub> (1 mL) was added TBAF (75 wt%, 0.1 mL) in an ice-water bath and the mixture was stirred at that temperature for 30 minutes. After adding saturated aqueous NH<sub>4</sub>Cl (1 mL), the normal work-up with EtOAc (2 mL, three times) and chromatographic purification (EtOAc/hexane = 1/5, then 1/3) yielded the corresponding acetylene (10.5 mg, 97% yield). To the acetylene (10.5 mg, 0.043 mmol) in EtOAc (1 mL) was added 10% Pd/C (3 mg) and the mixture was stirred under an atmospheric hydrogen balloon at room temperature for 12 hours. The resulting solution was filtered through celite

(1.5 g) with EtOAc (6 mL) and evaporated in vacuo. The residue was separated chromatographically (EtOAc/hexane = 1/3, then 1/1) to supply **25** (10.5 mg, 98% yield, 95% ee). Since its chiral HPLC chromatogram was identical with that of (*S*)-**25** prepared from **13** by consecutive desymmetrization and kinetic resolution, the major enantiomer of **35** was determined to have (*S*)-configuration.

### VIII. References

- 12 M. S. Hong, T. W. Kim, B. Jung, S. H. Kang, *Chem. Eur. J.* 2008, **14**, 3290..
- 13 T. Fukuda, K. Sugiyama, S. Arima, Y. Harigaya, T. Nagamitsu, S. Omura, *Org. Lett.* 2008, **10**, 4239.
- 14 H. Ooi, N. Ishibashi, Y. Iwabuchi, J. Ishihara, S. Hatakeyama, *J. Org. Chem.* 2004, **69**, 7765.
- 15 S. Kim, H. Lee, M. Lee, T. Lee, *Synthesis* 2006, **5**, 753.
- 16 S. Sugiyama, S. Arai, K. Ishii, *Tetrahedron* 2012, **68**, 8033.
- 17 Y. Iio, M. Yamaoka, M. Jin, Y. Nakamura, T. Nishi, *Tetrahedron: Asymmetry* 2011, **22**, 323.
- 18 M. Martinkova, J. Gonda, J. Raschmanova, A. Uhrikova, *Tetrahedron: Asymmetry* 2008, **19**, 1879..
- 19 H. Pietsch, *Tetrahedron Lett.* 1972, **27**, 2789.

## IX. Selected NMR Spectral Charts

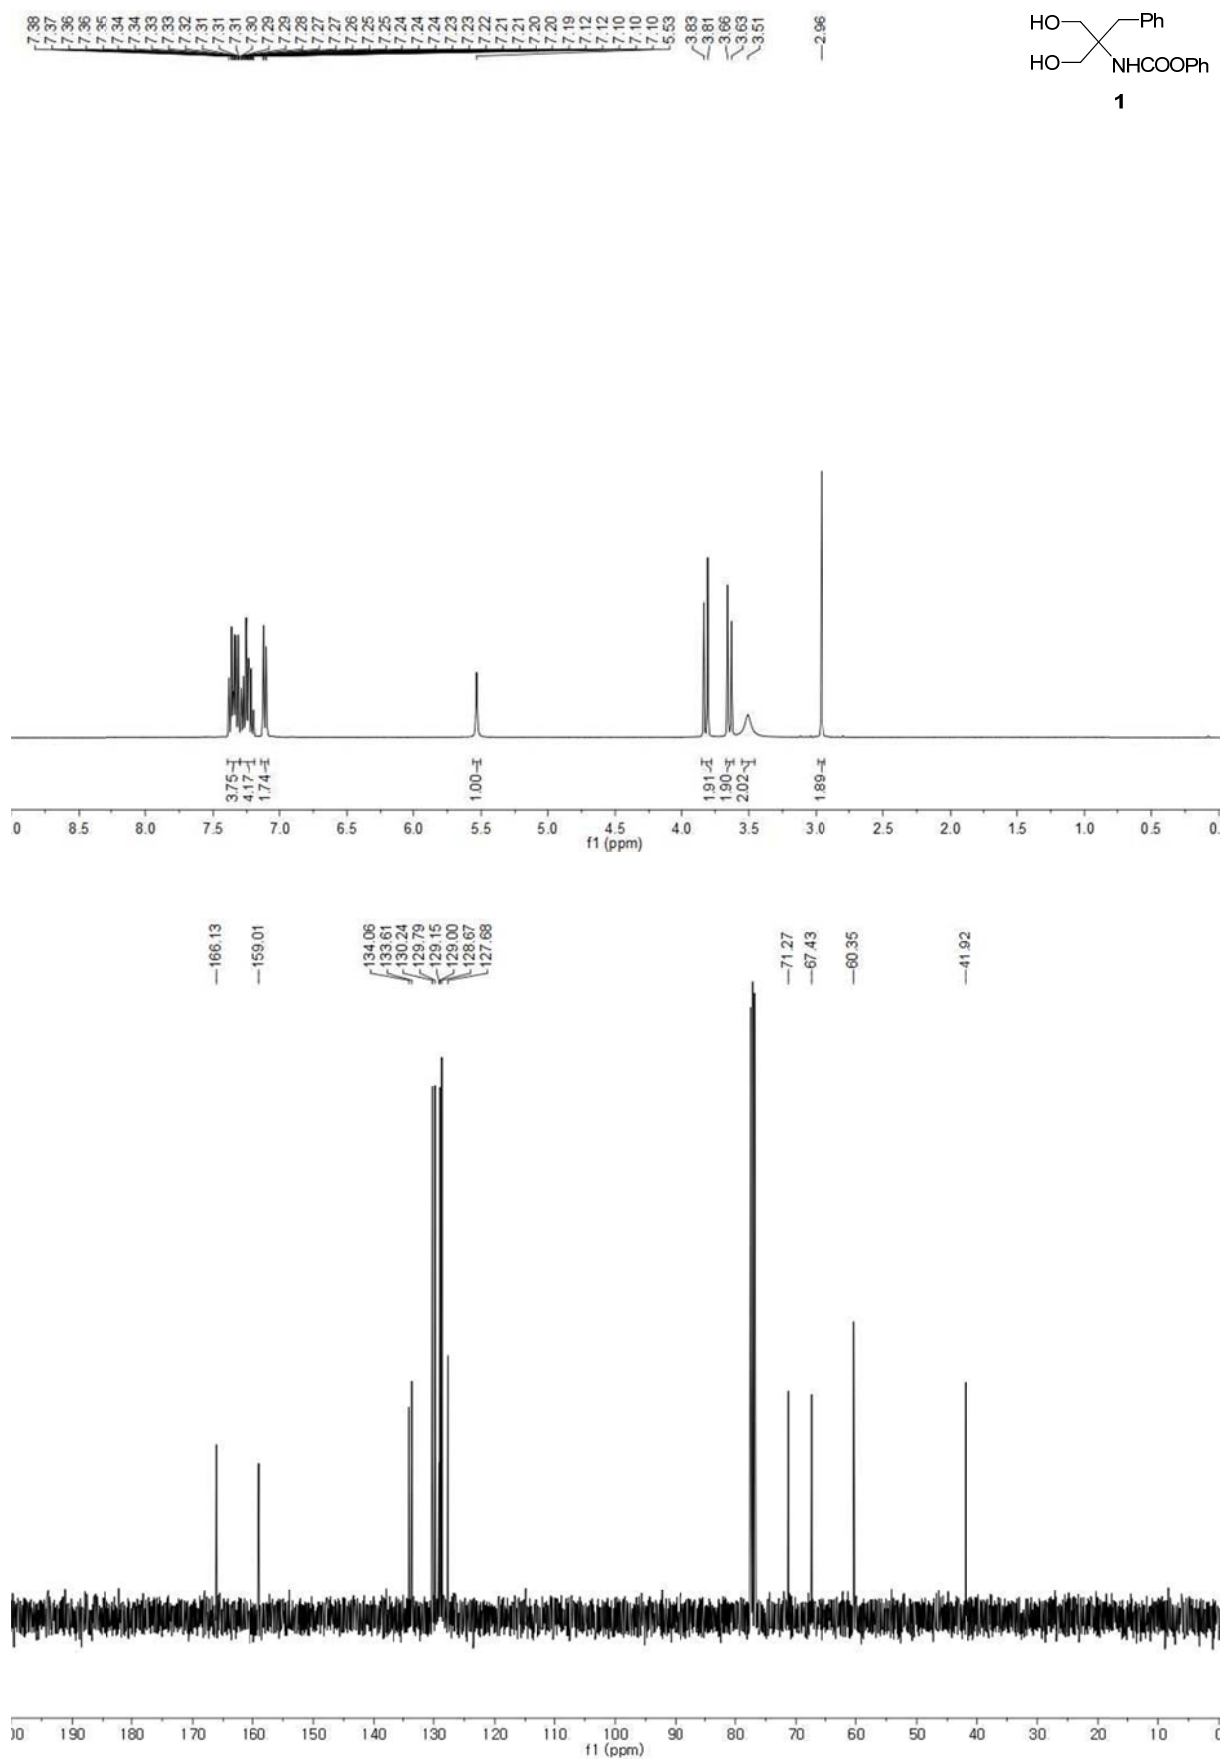

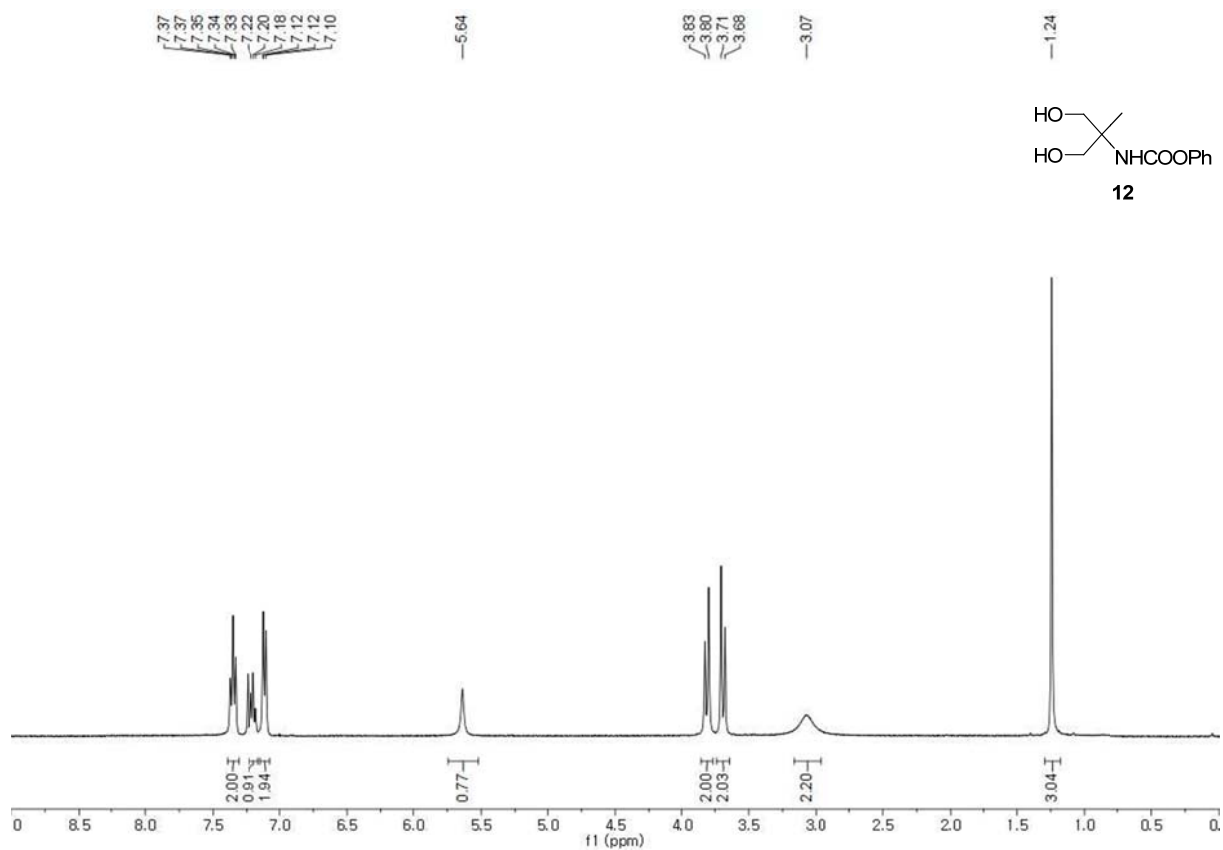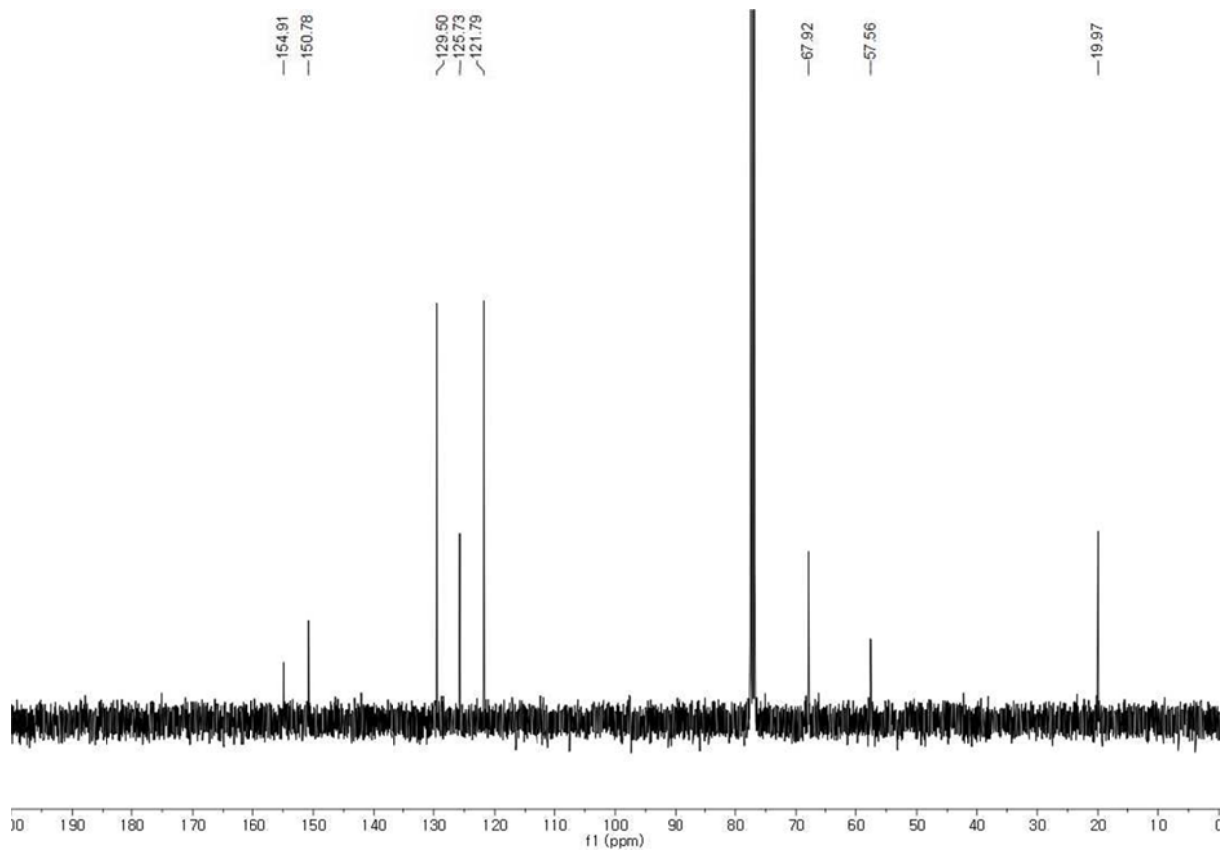

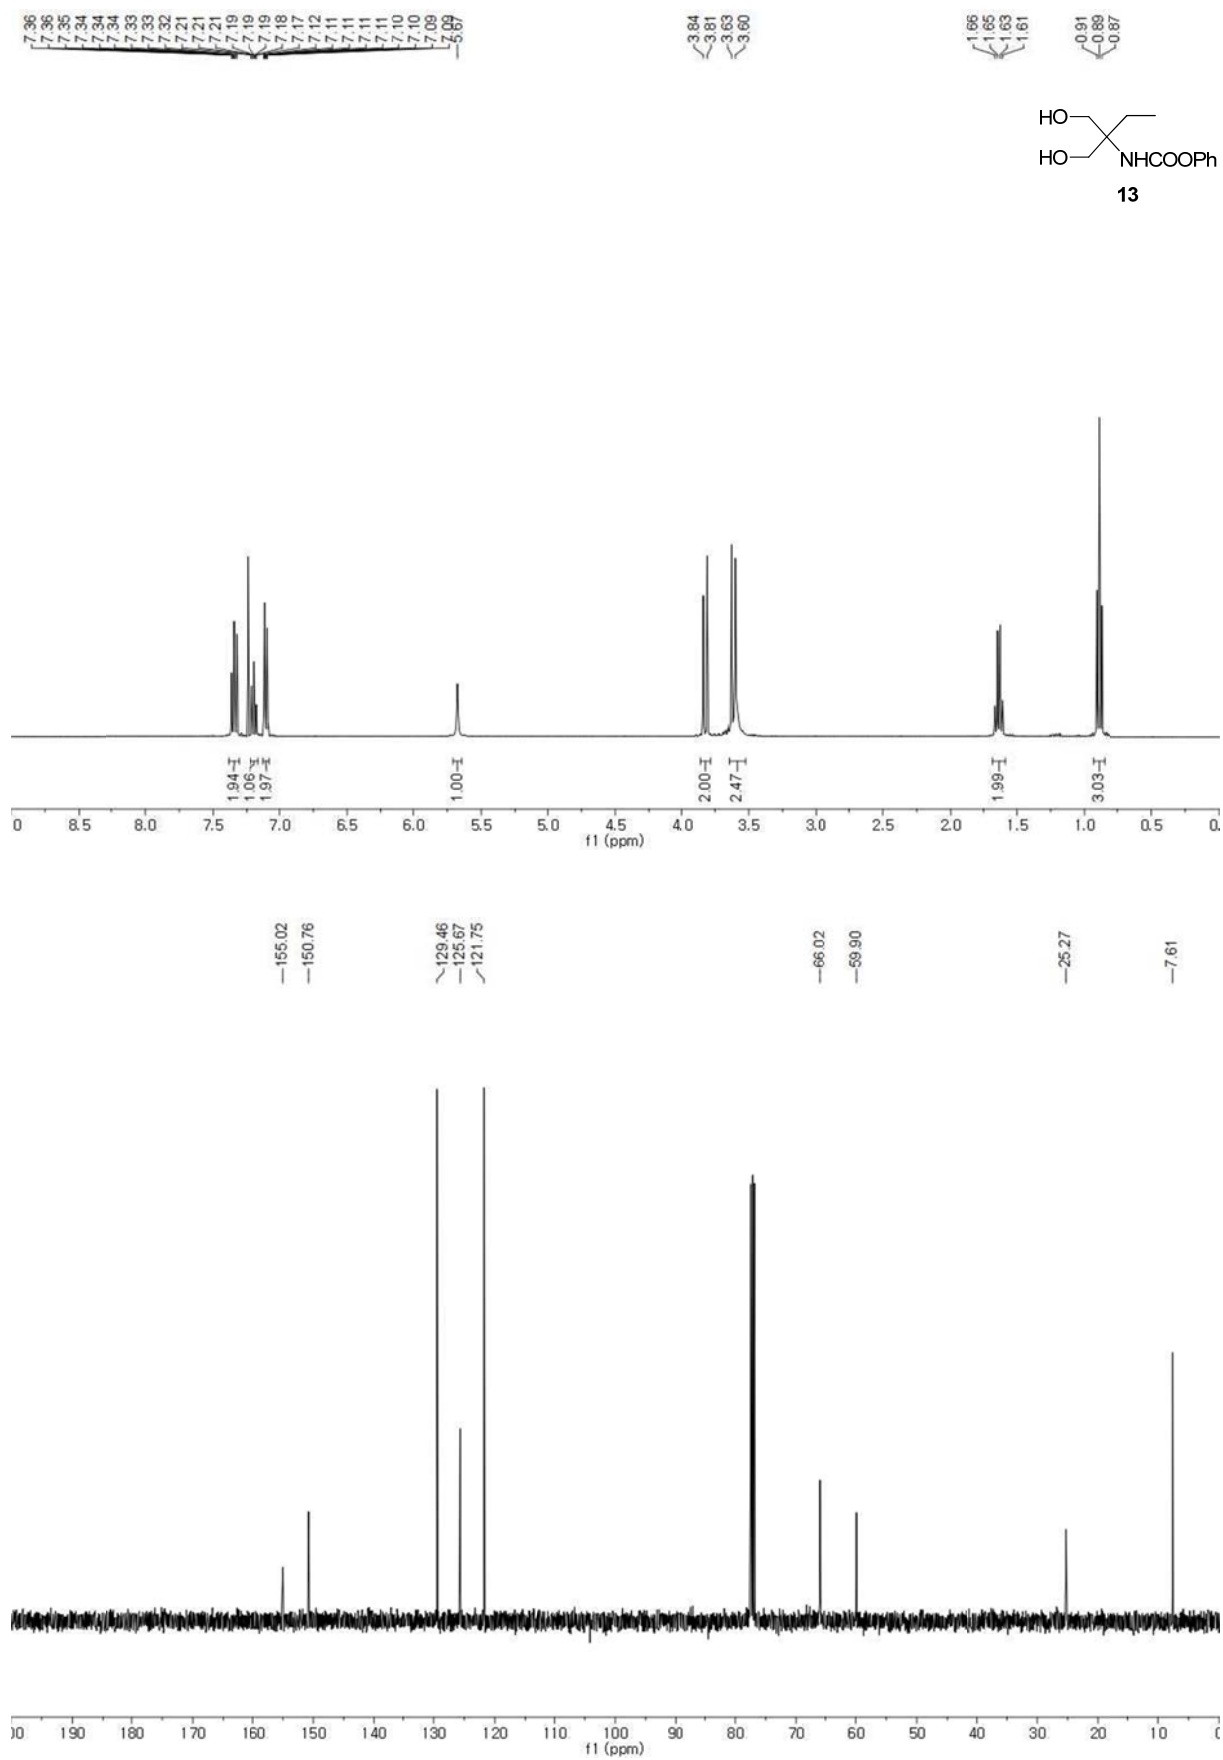

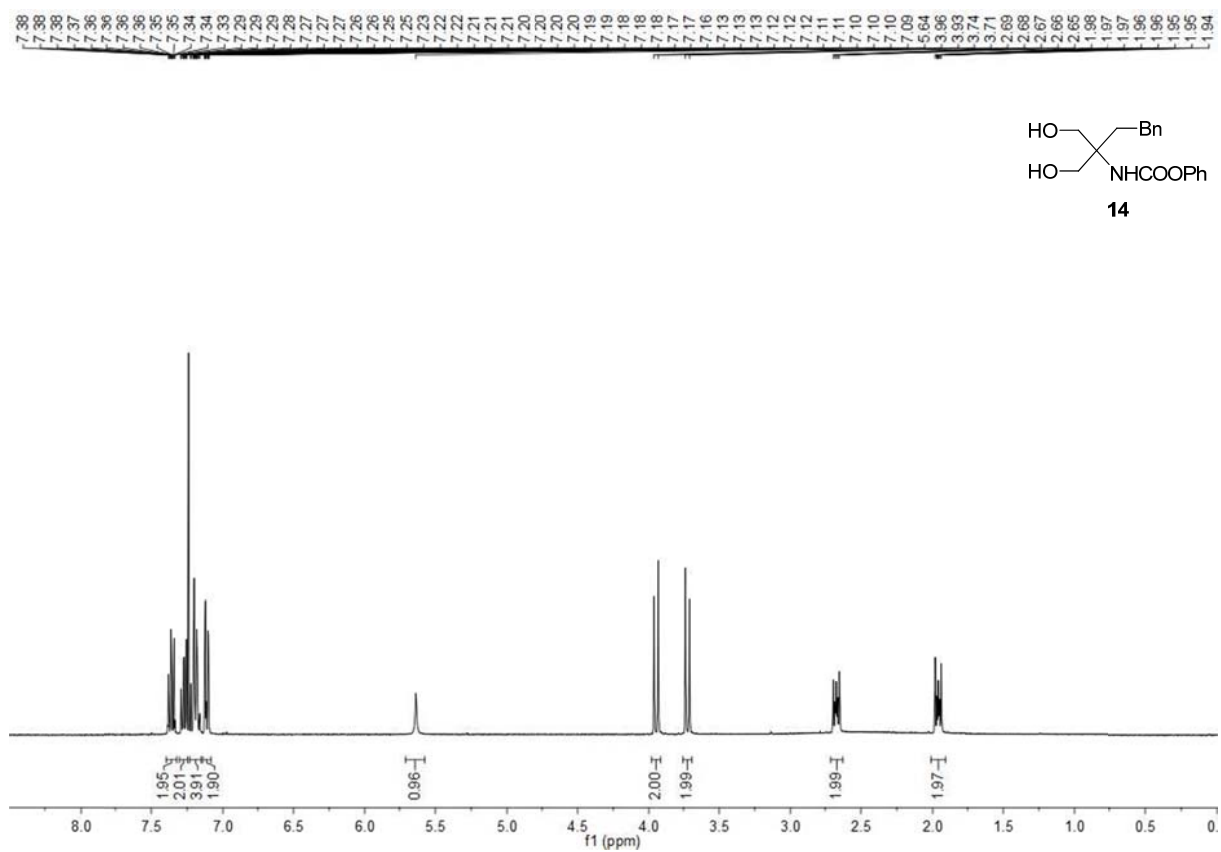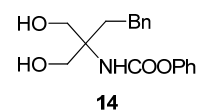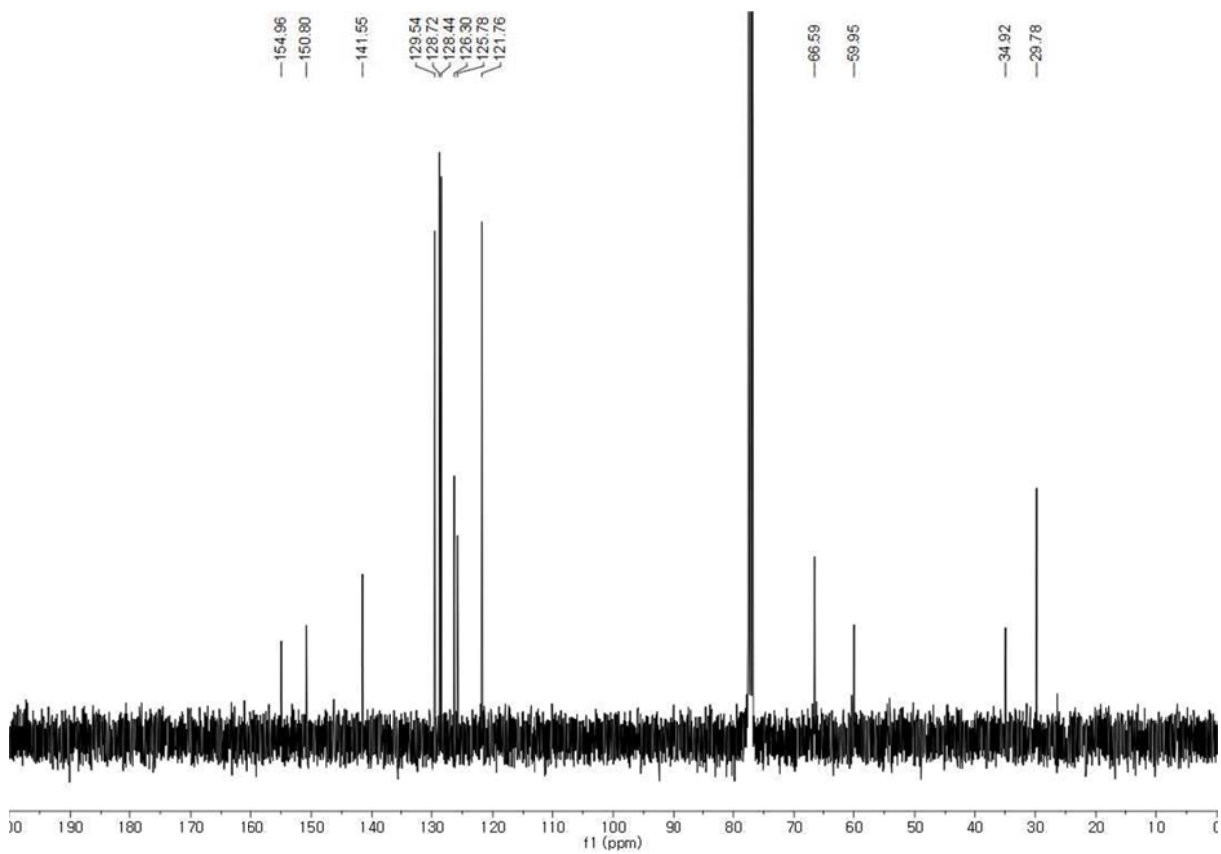

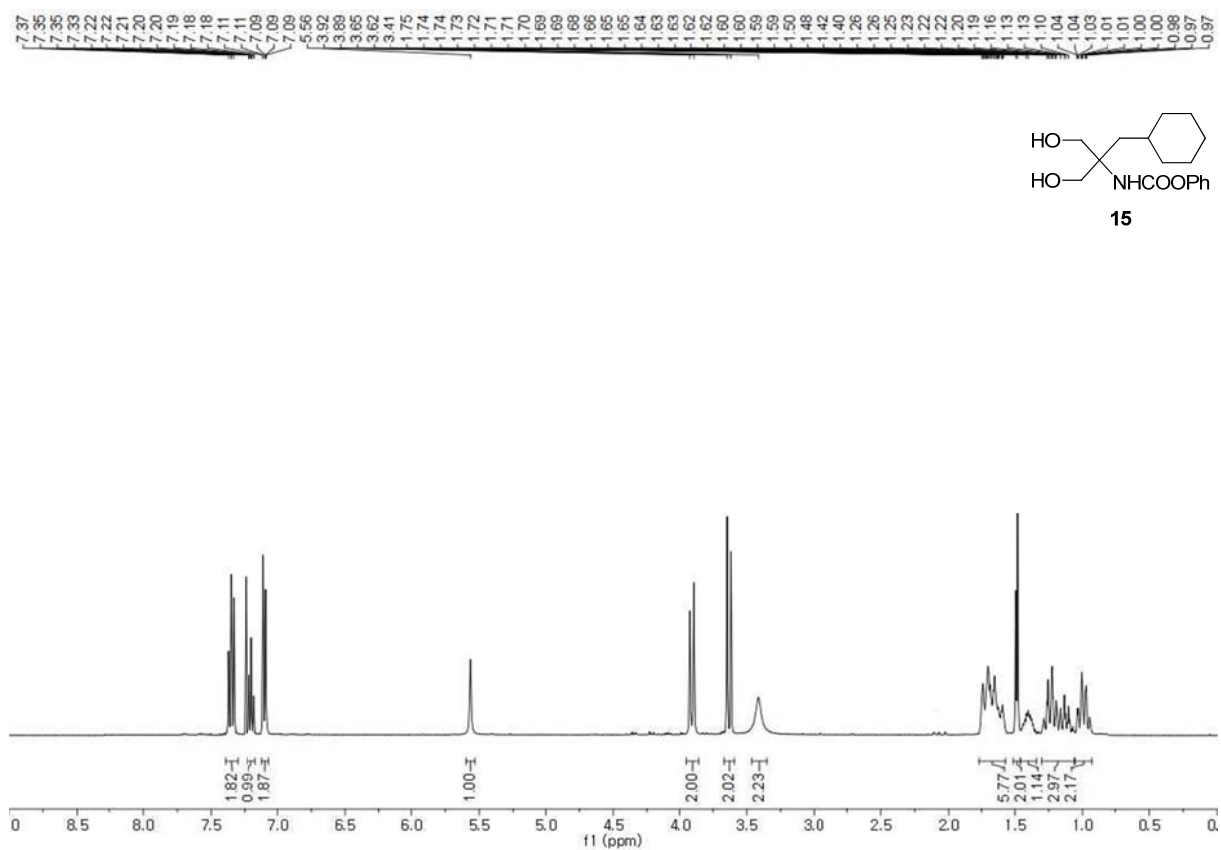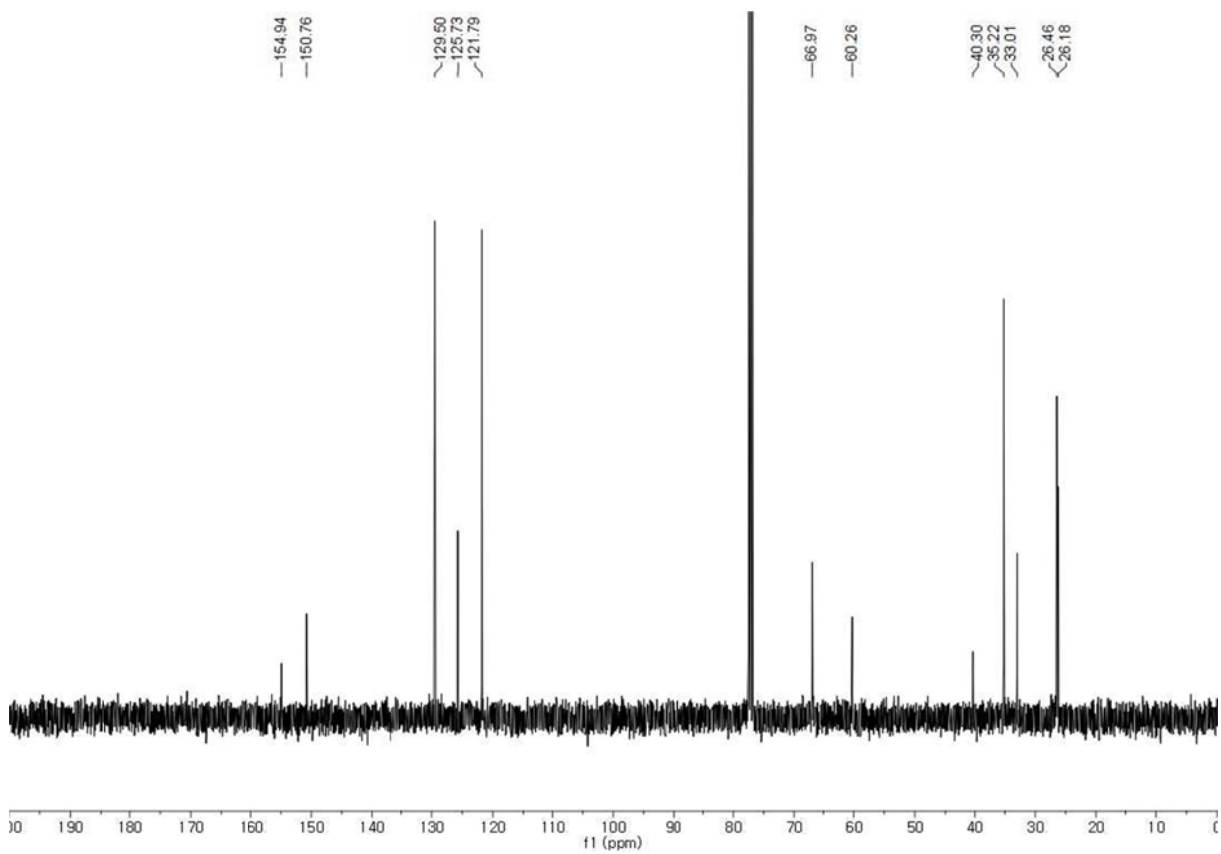



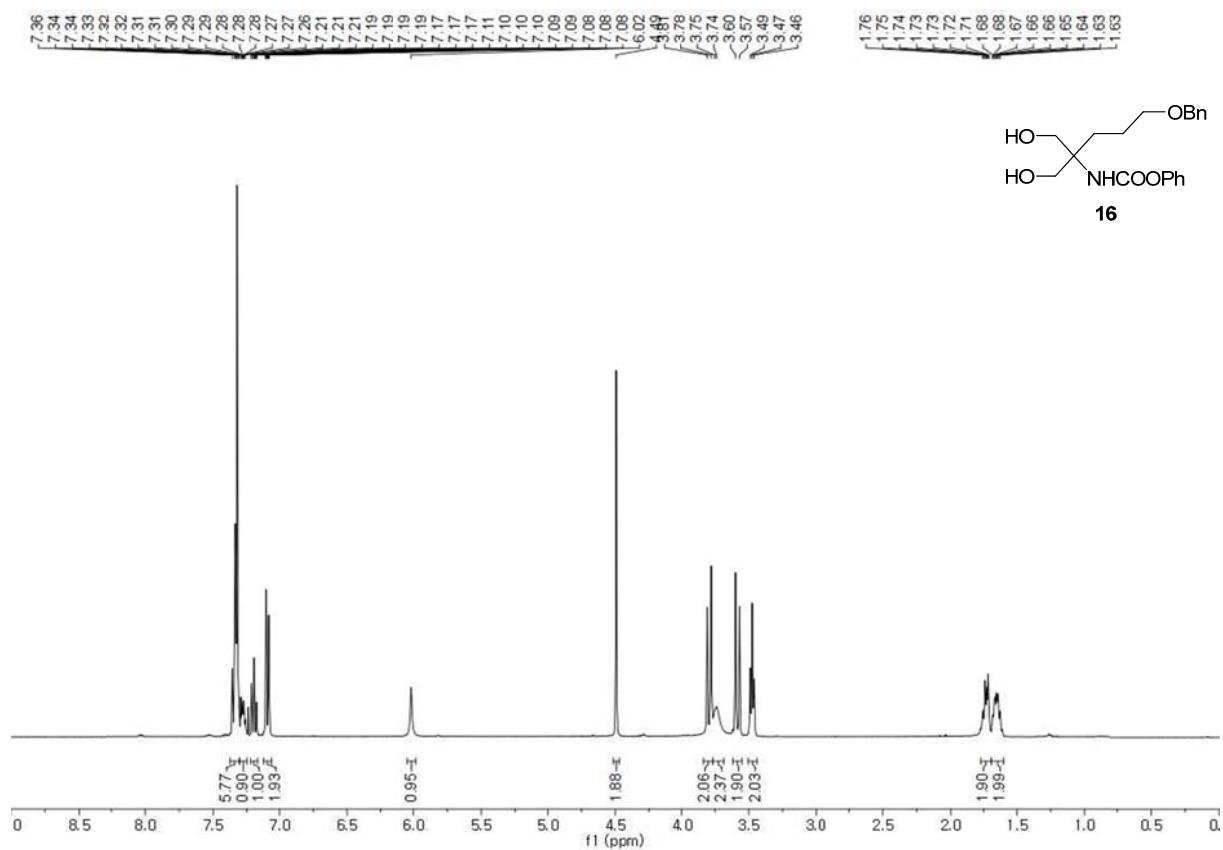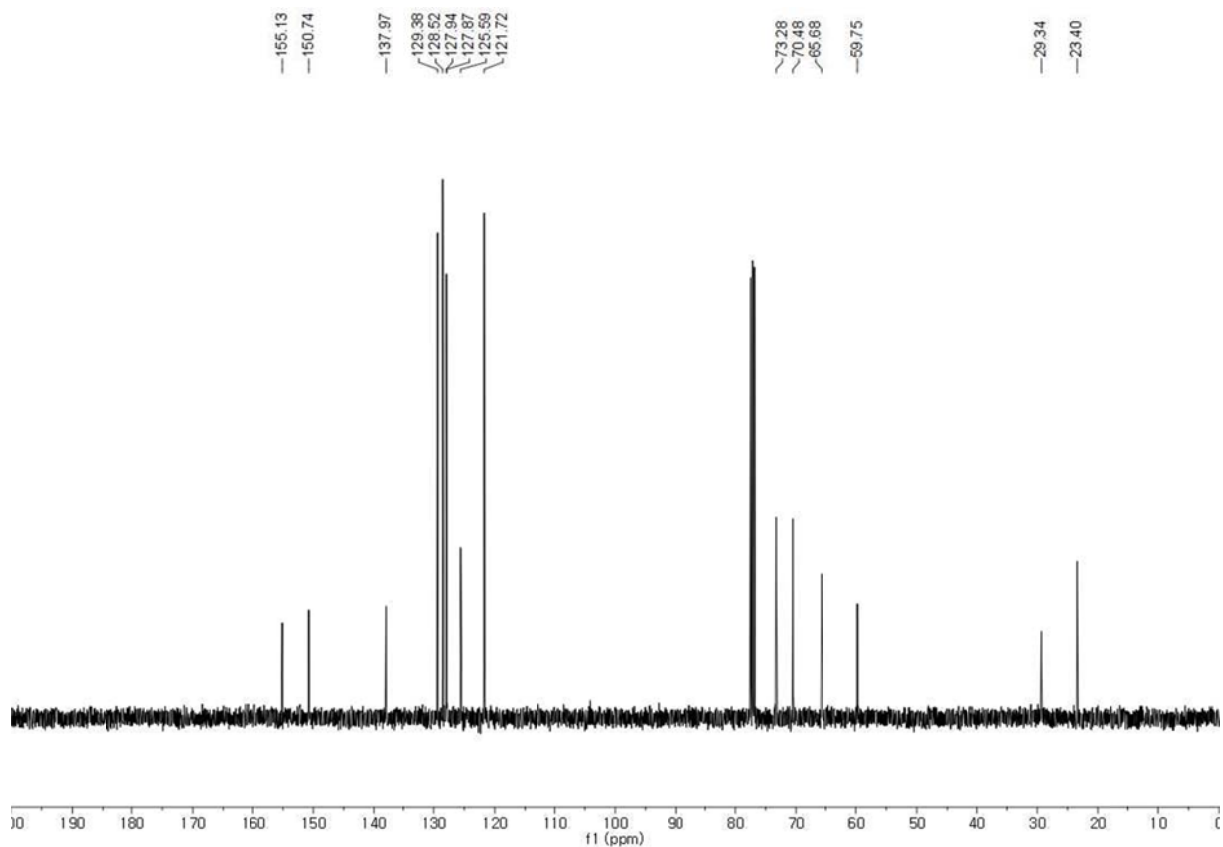

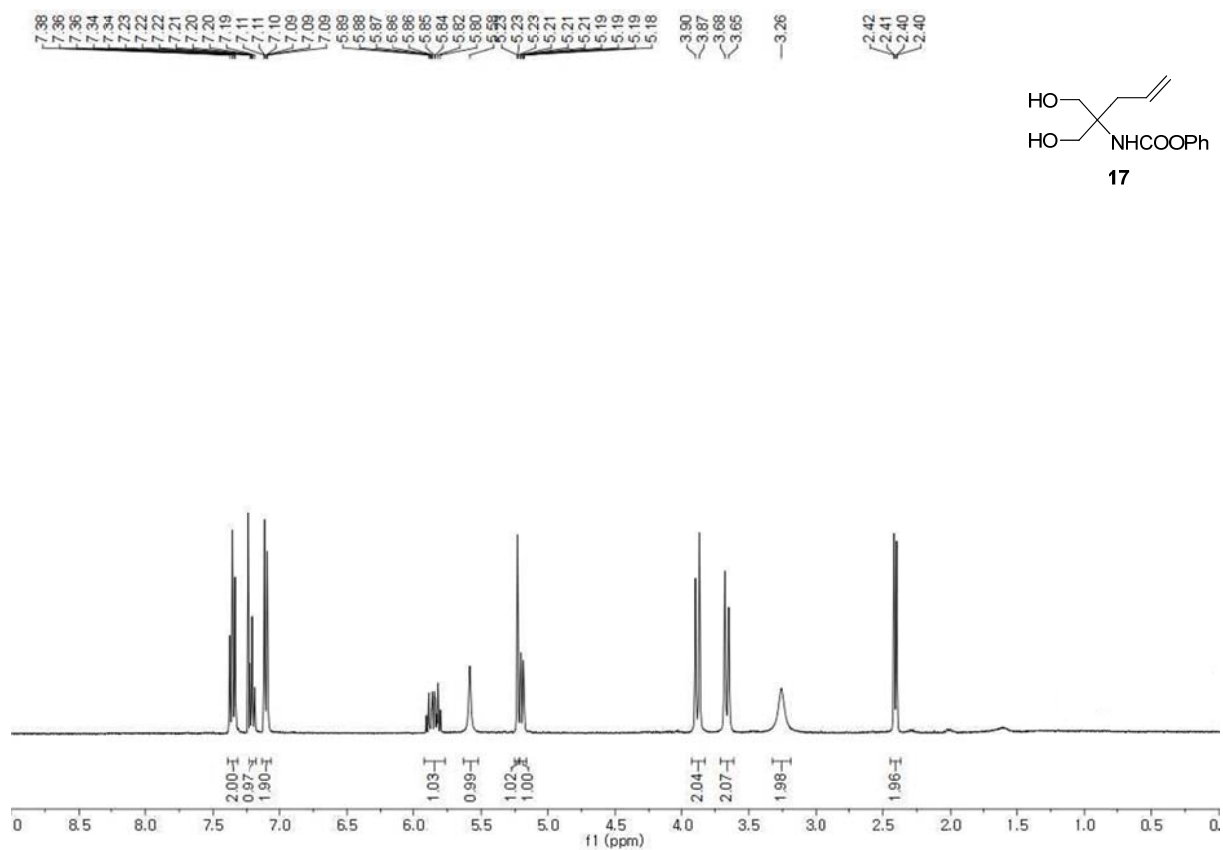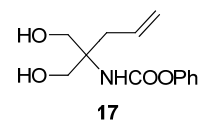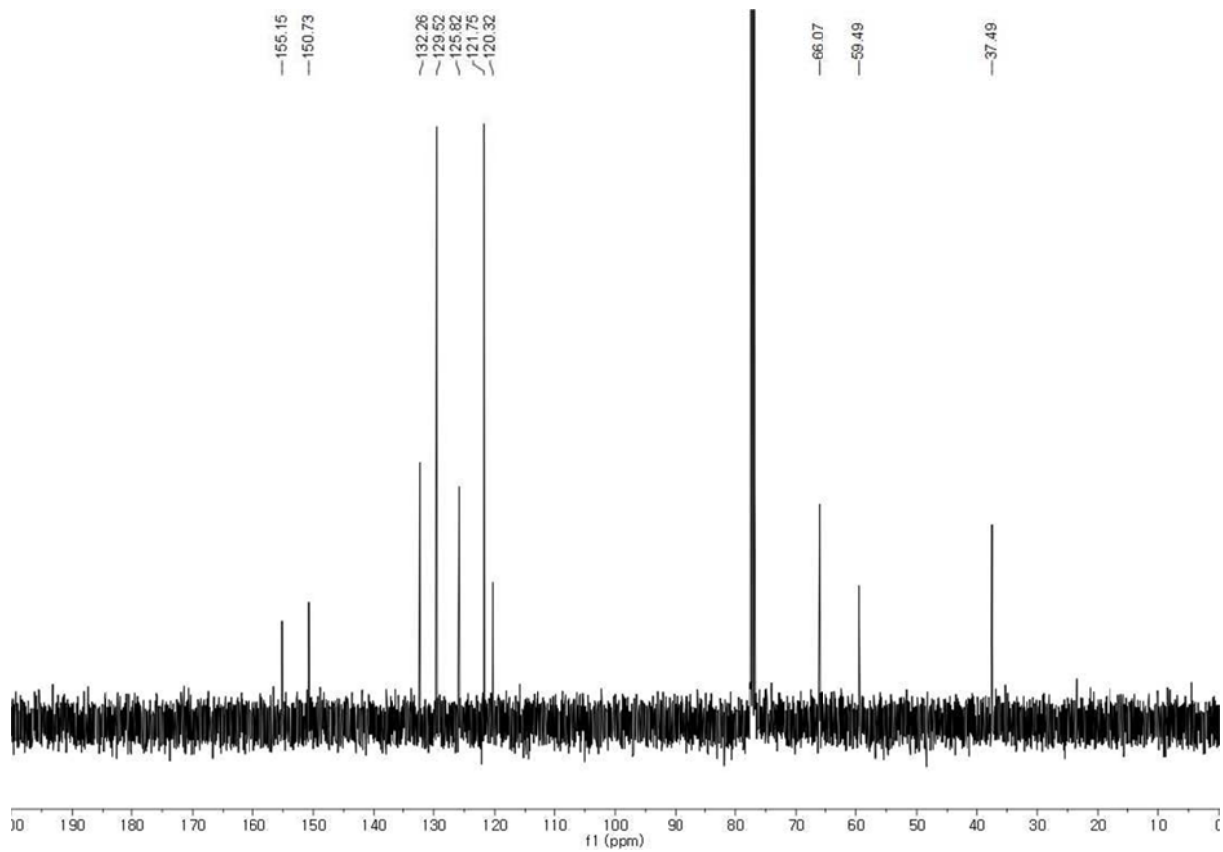



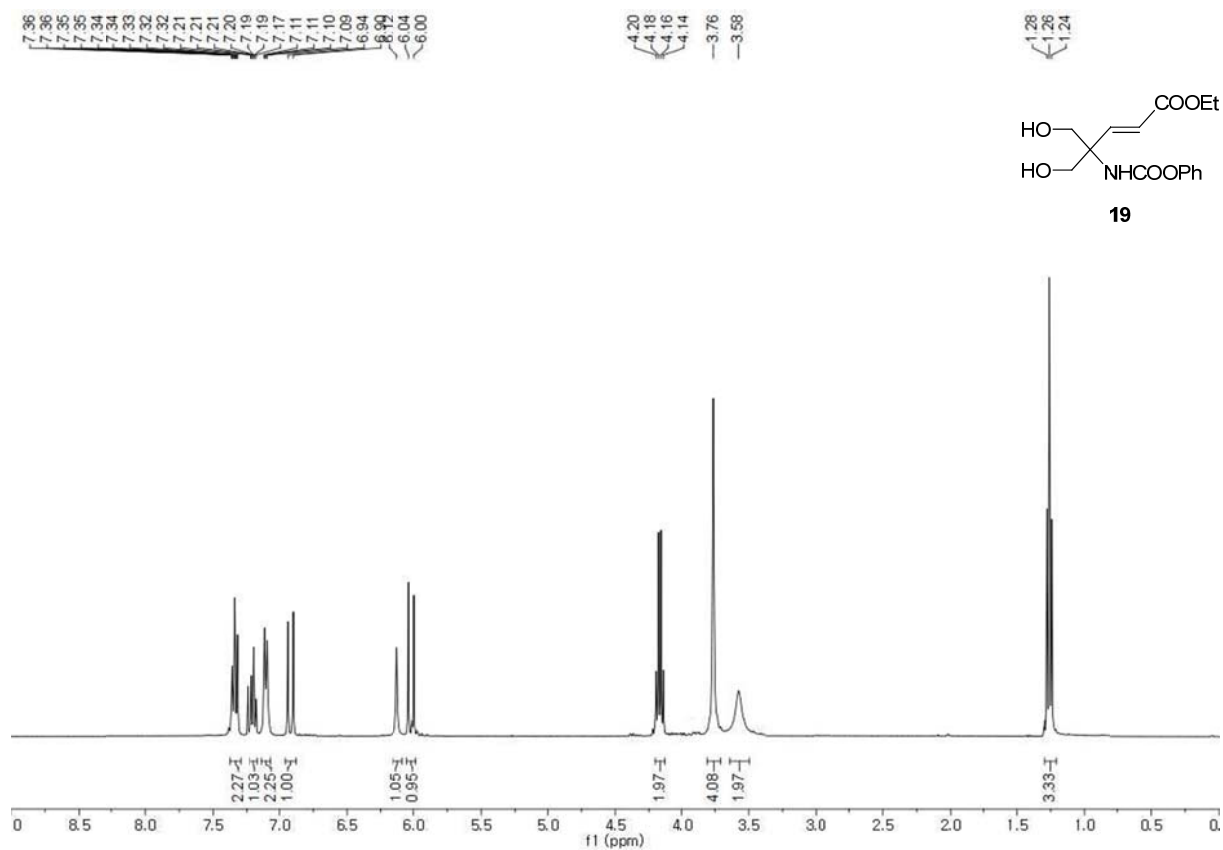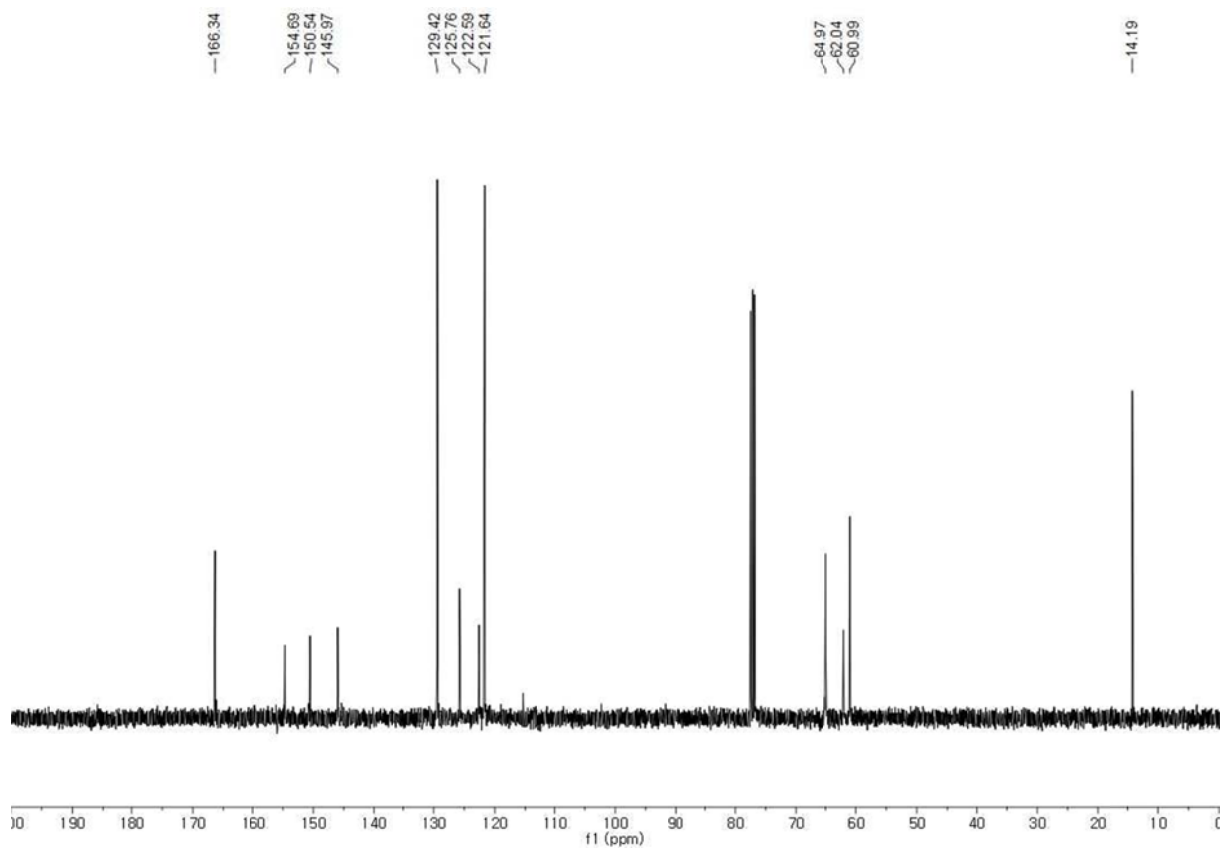

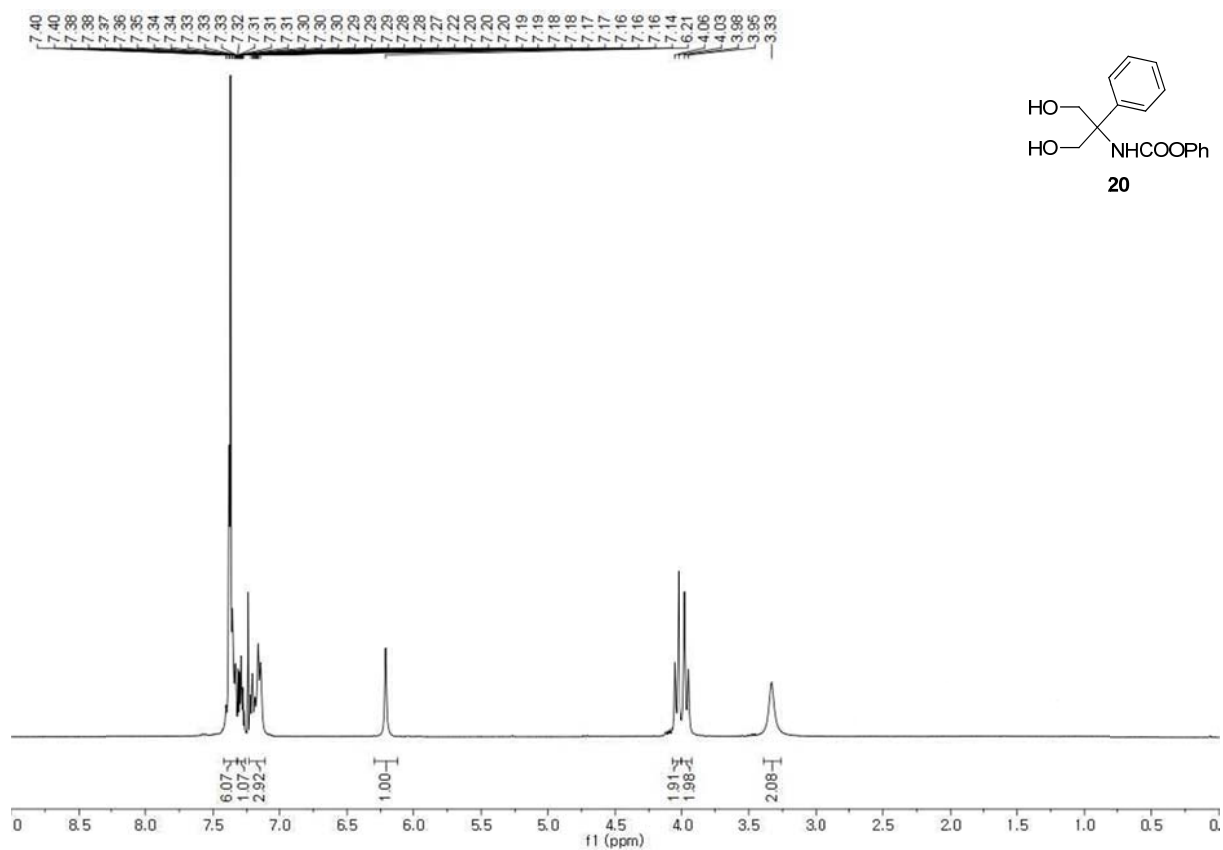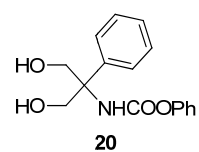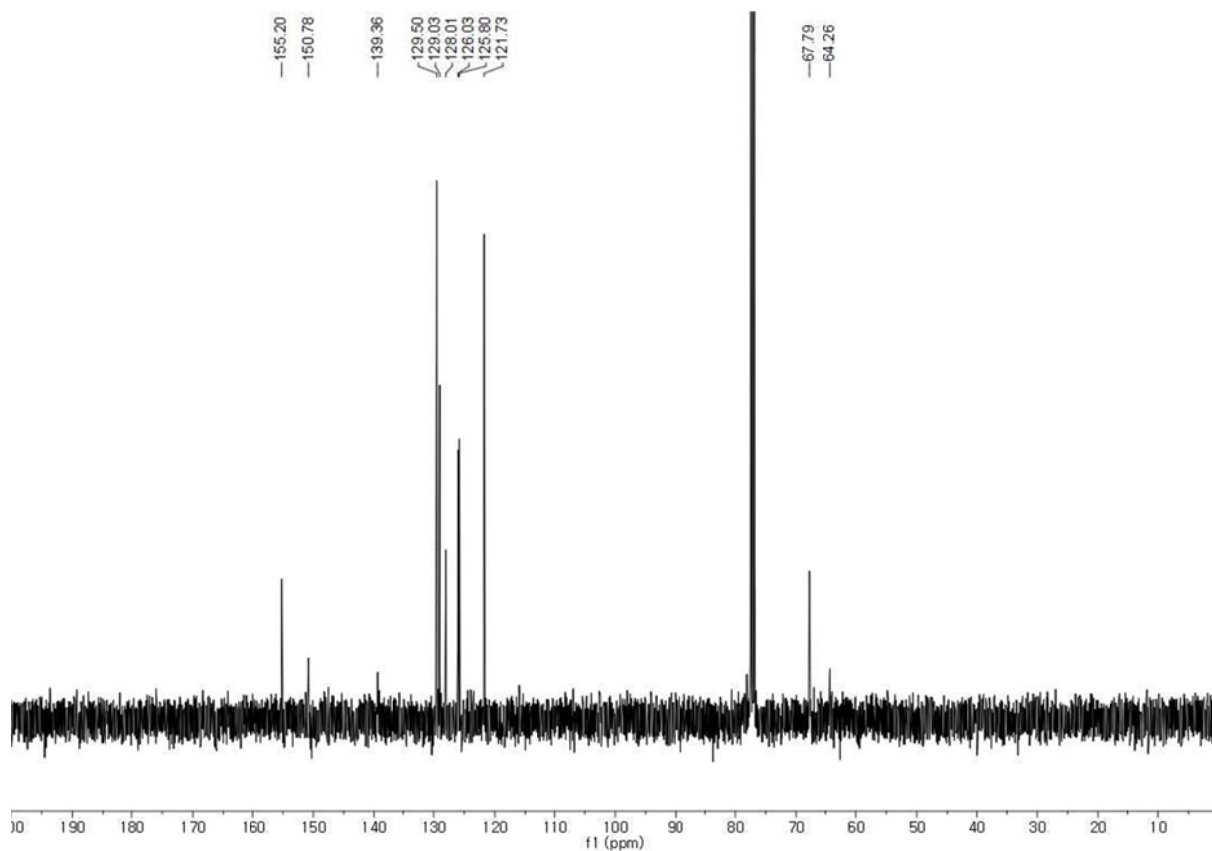

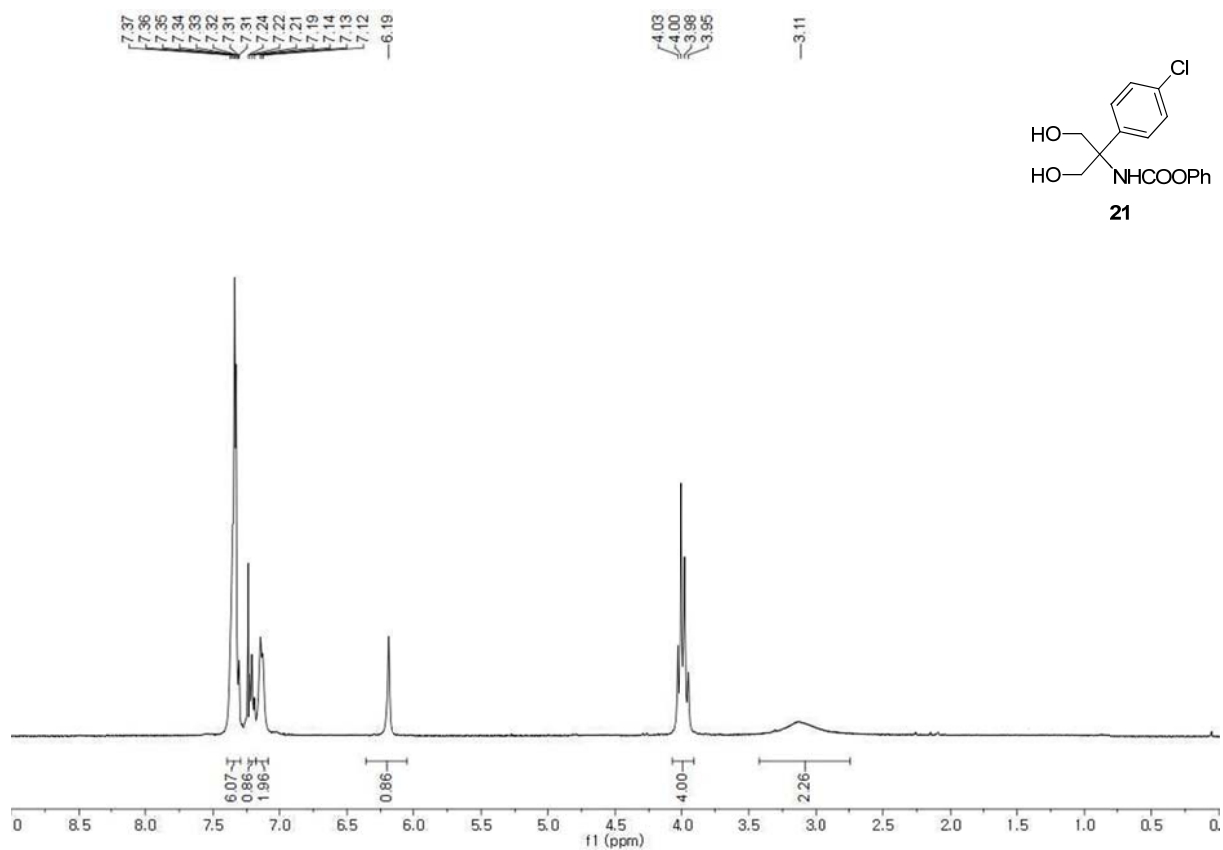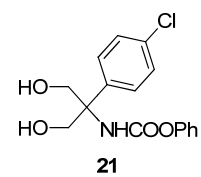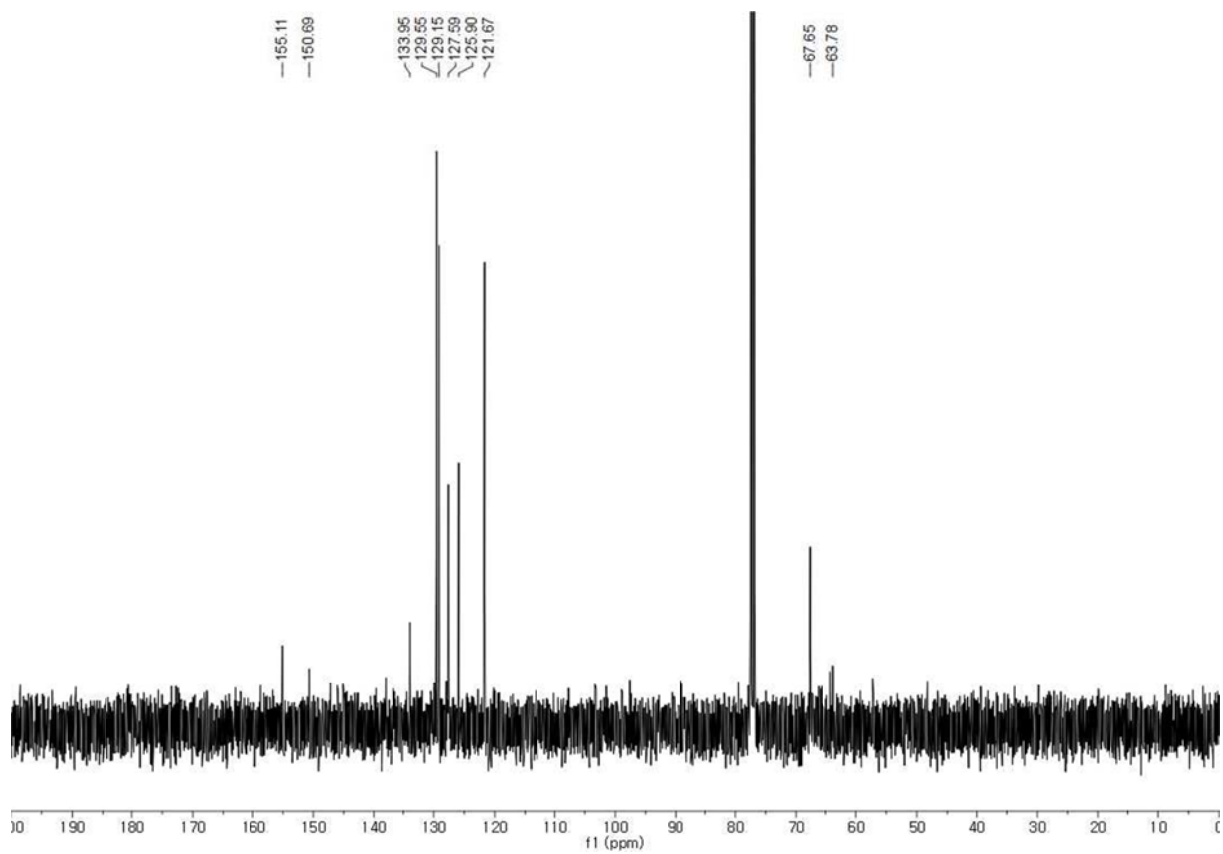

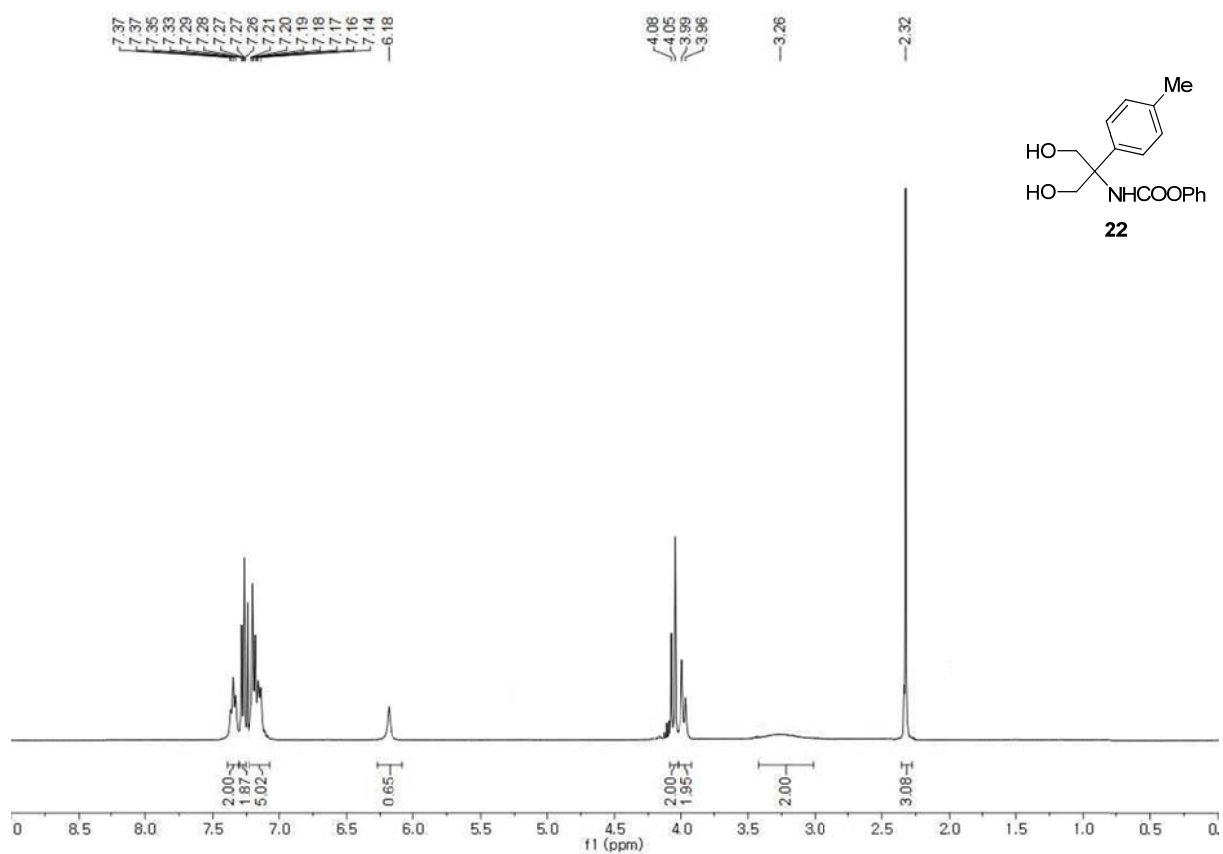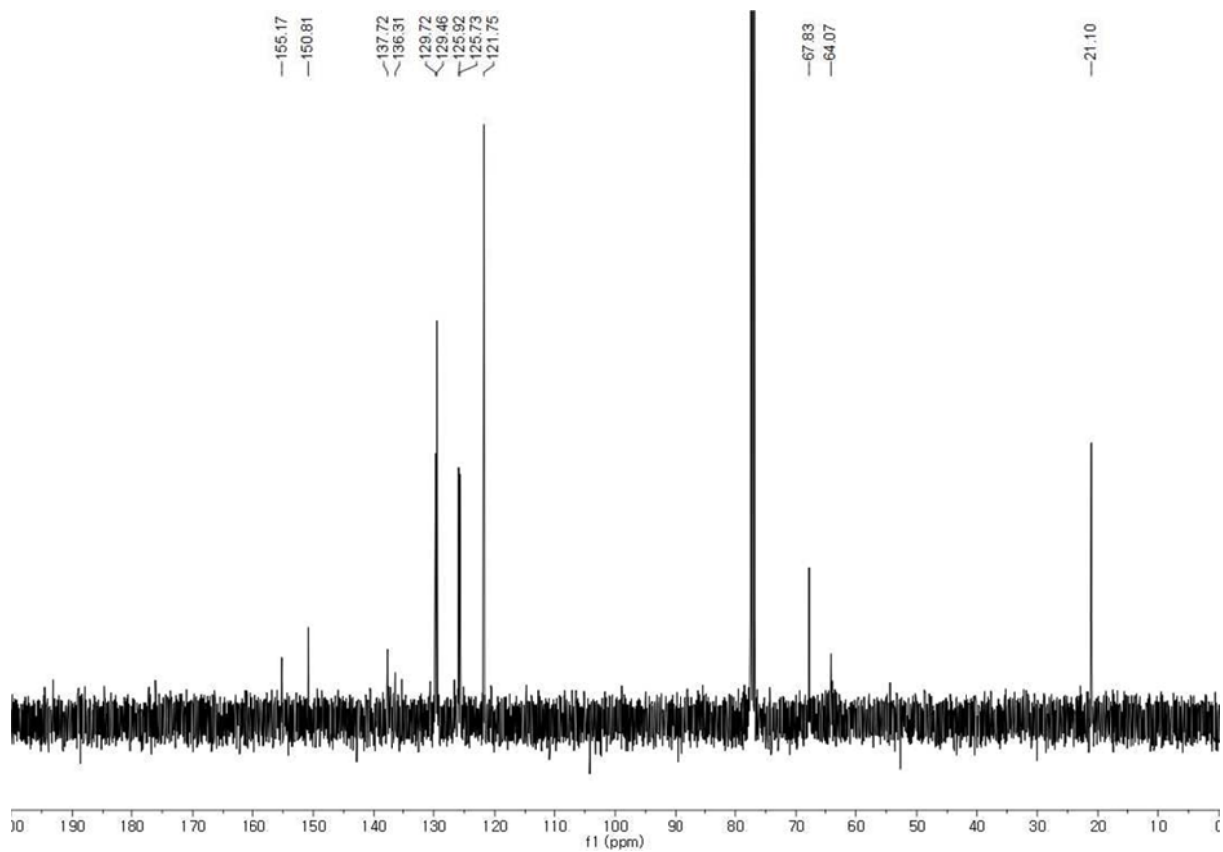

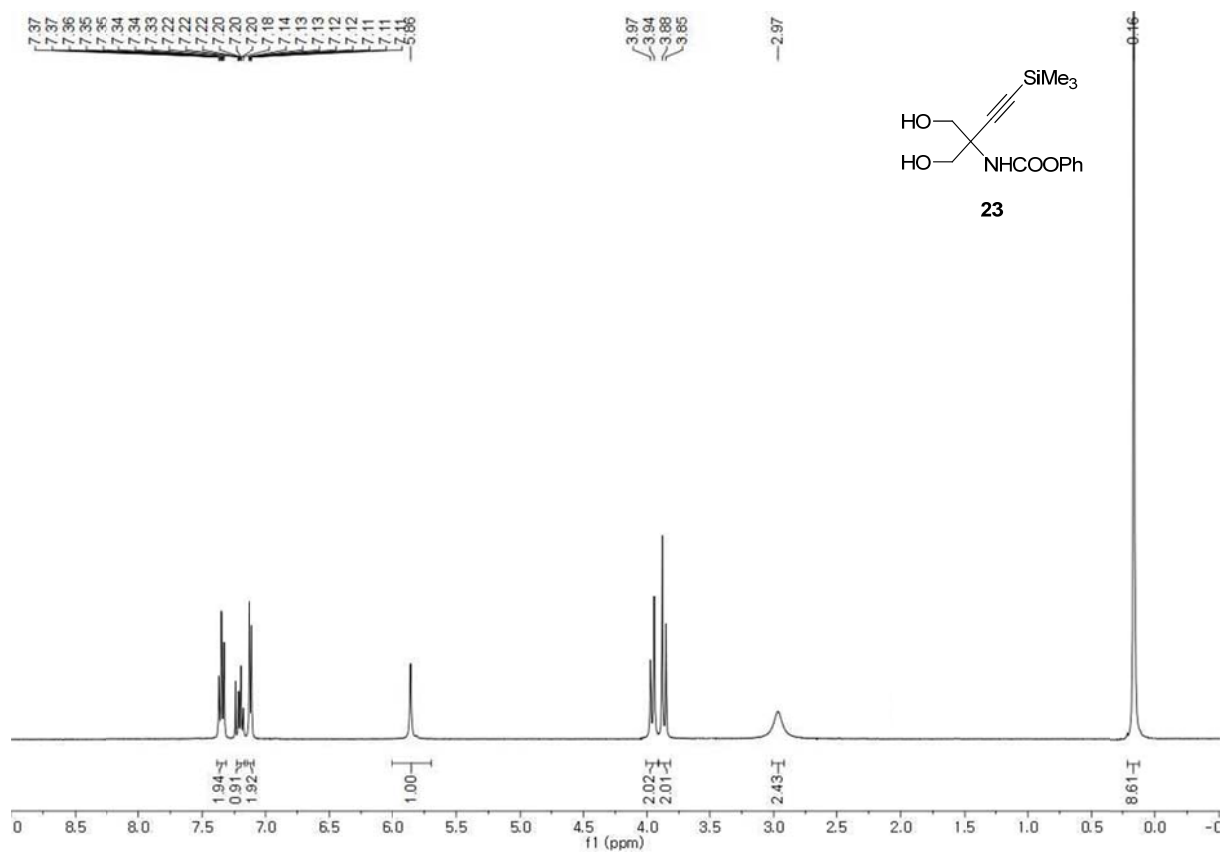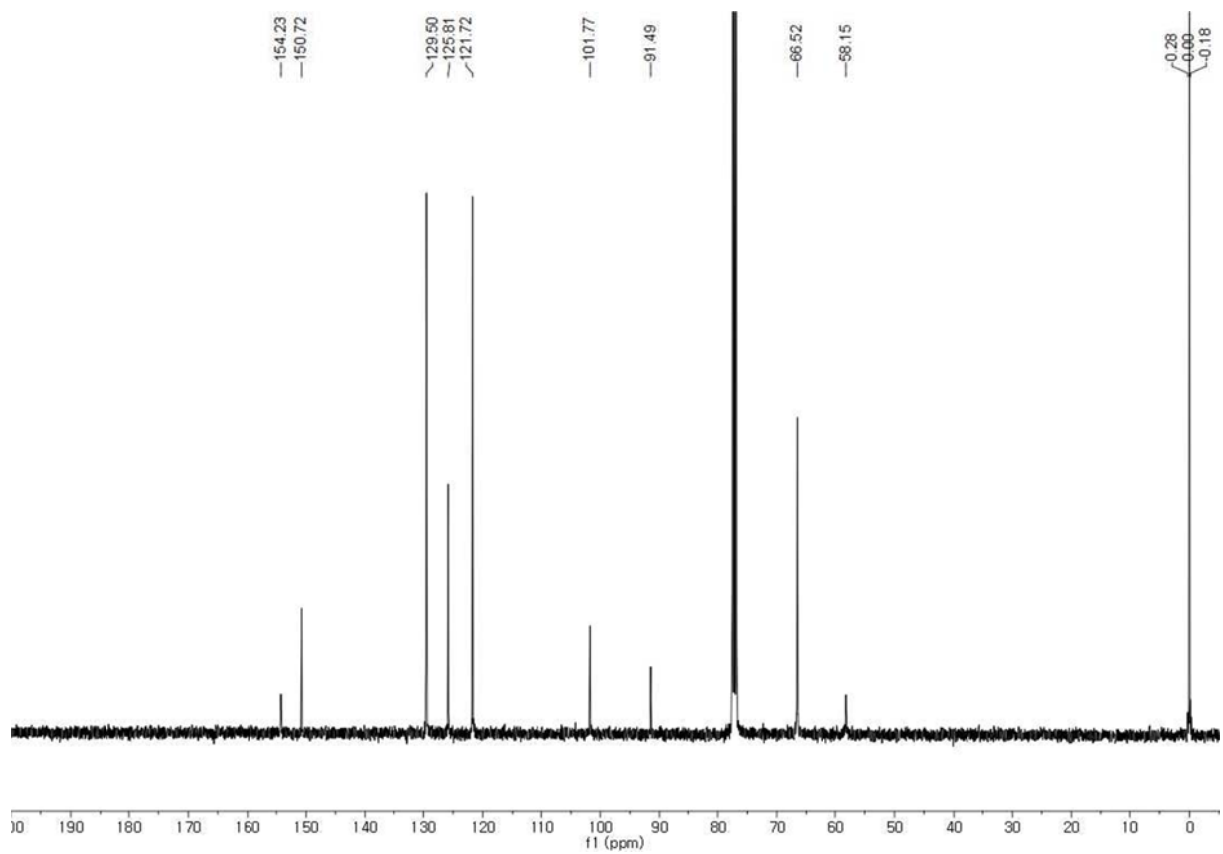



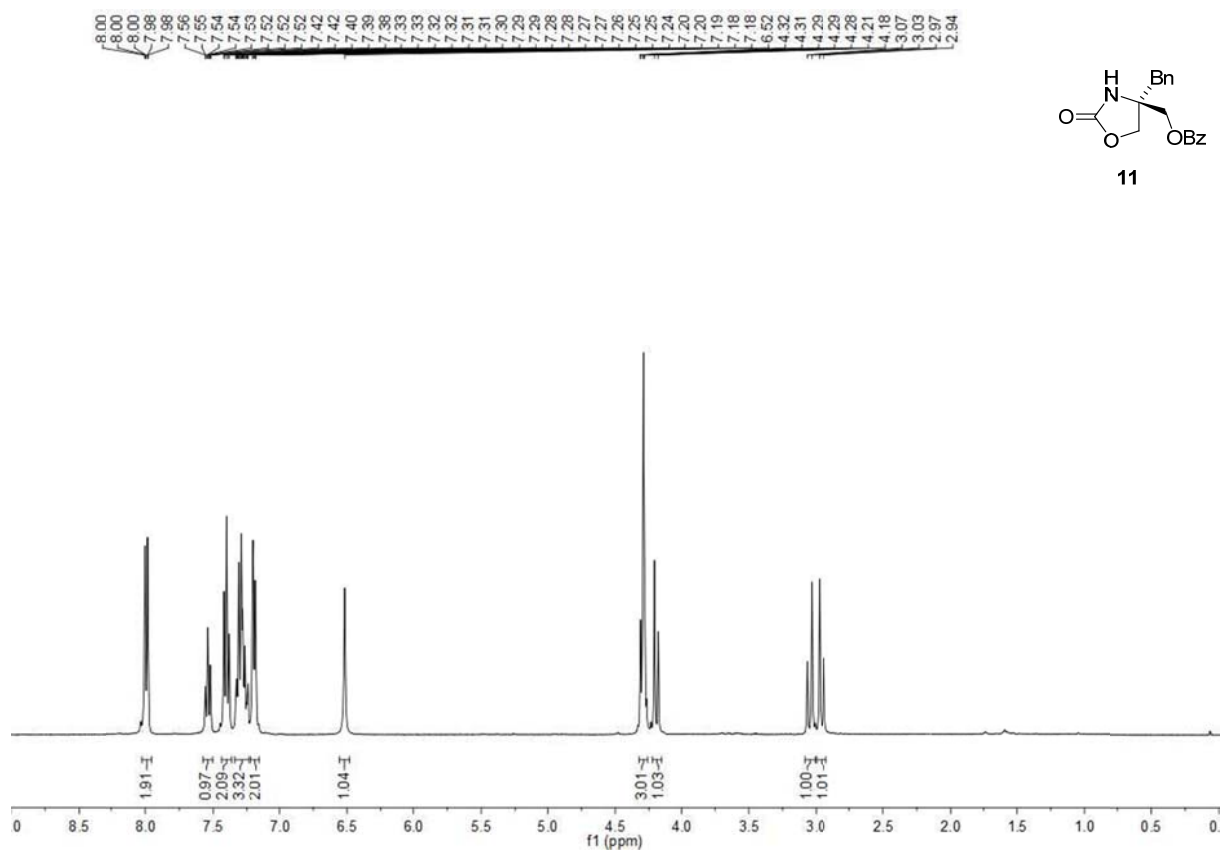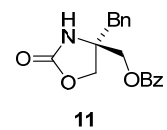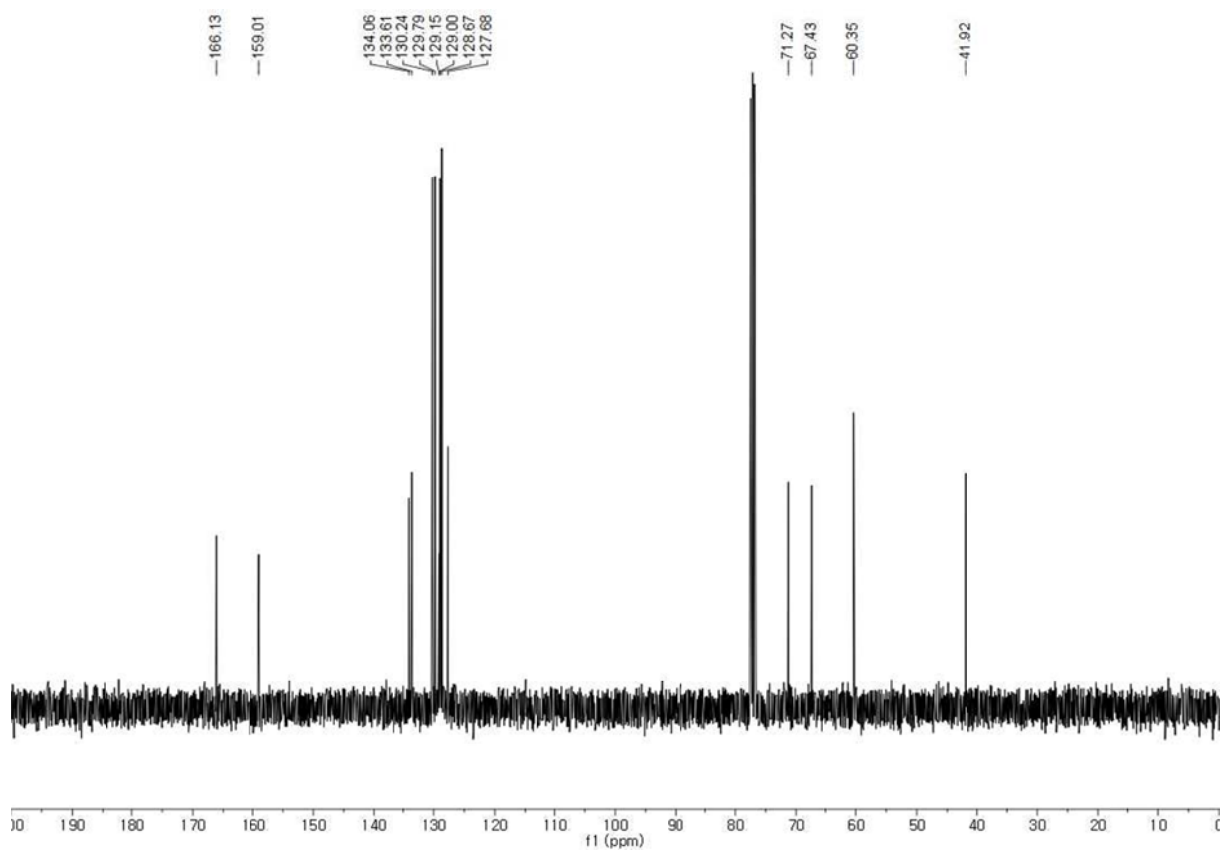

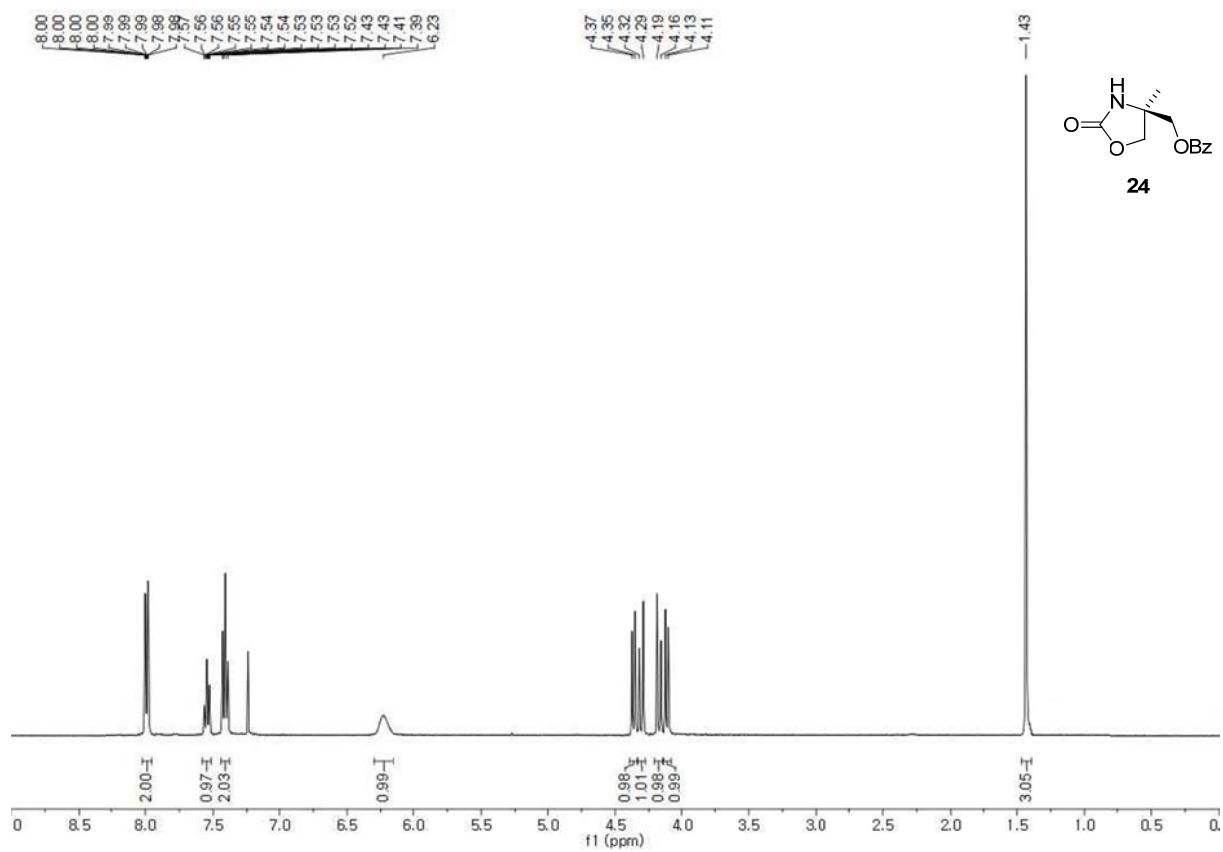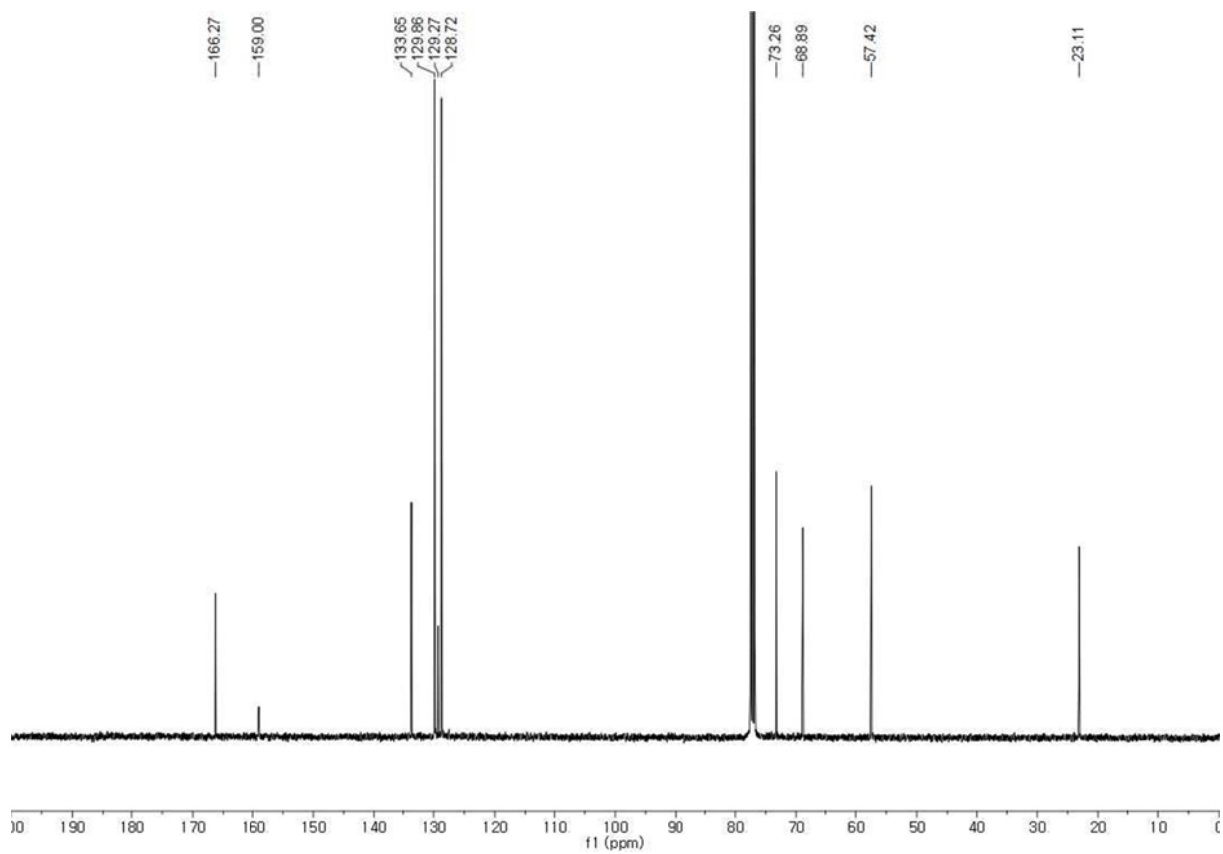

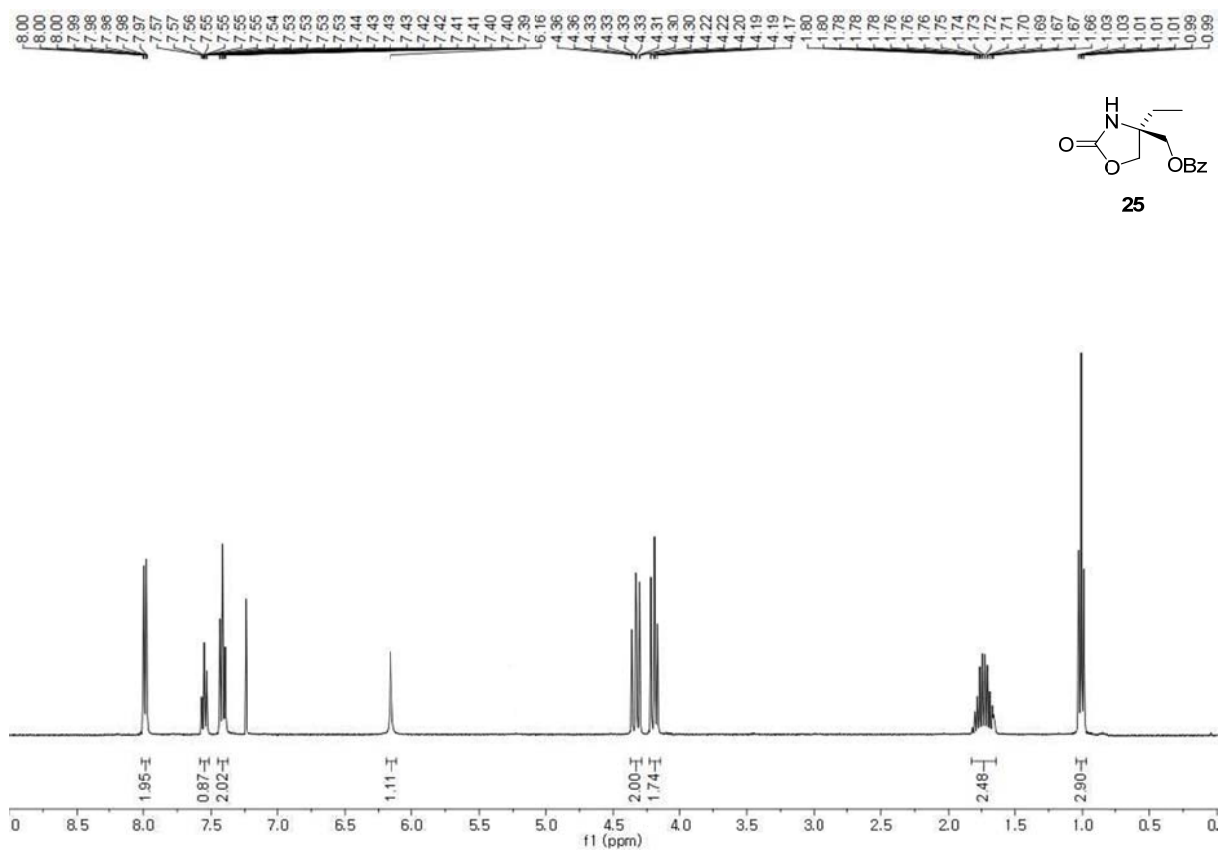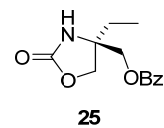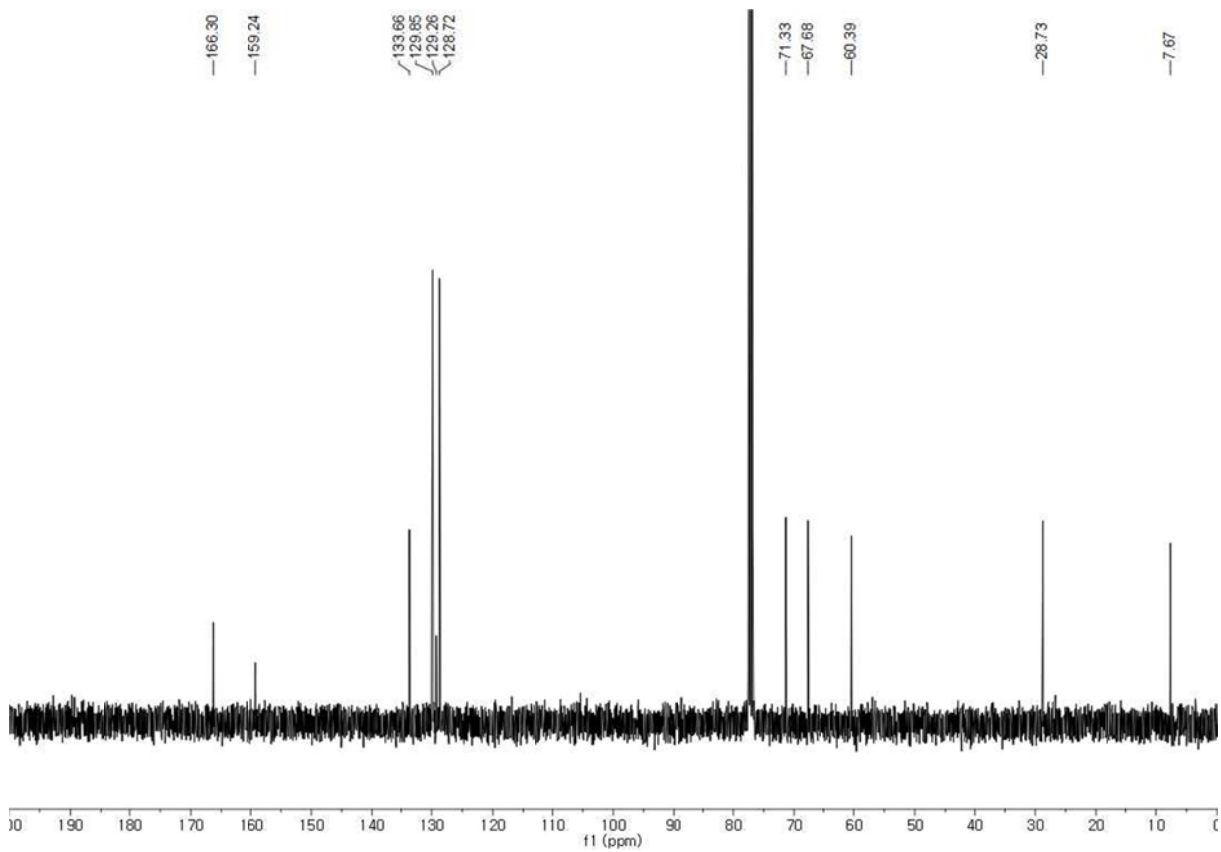

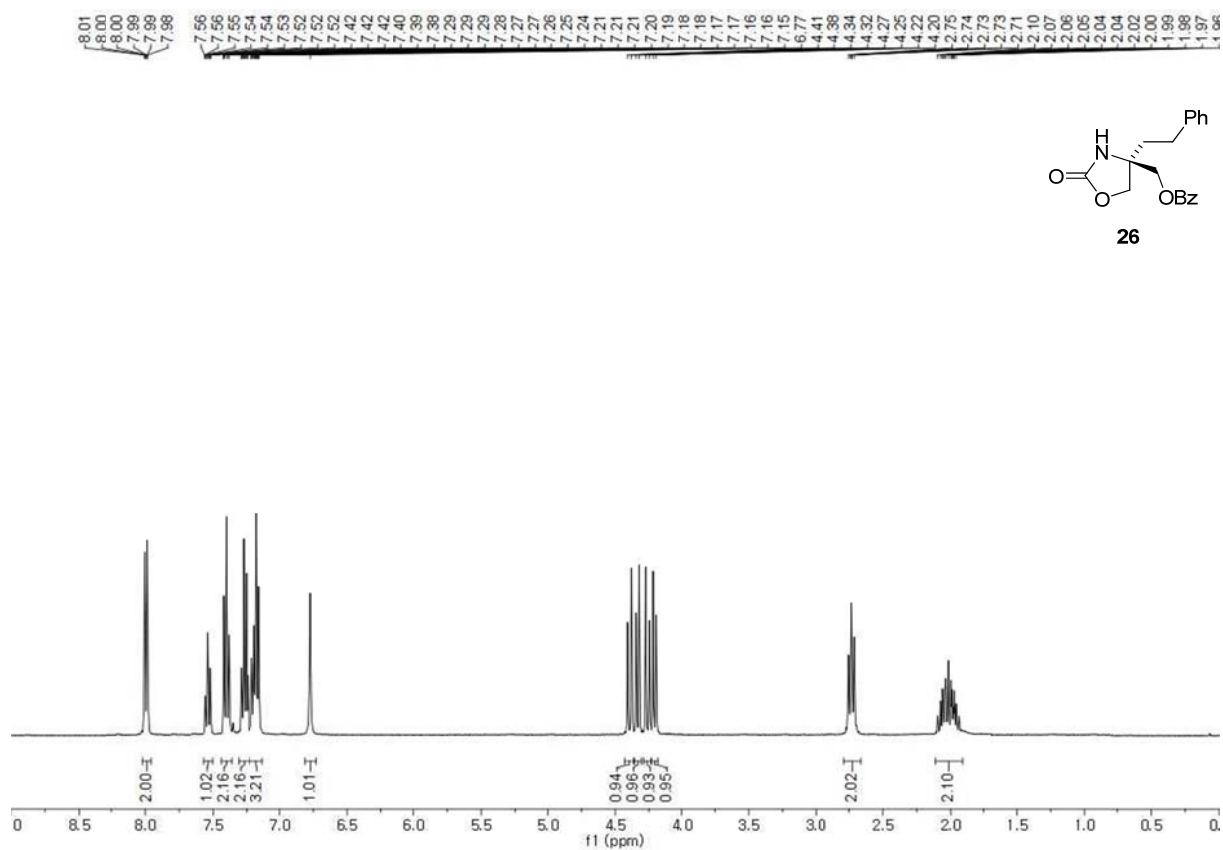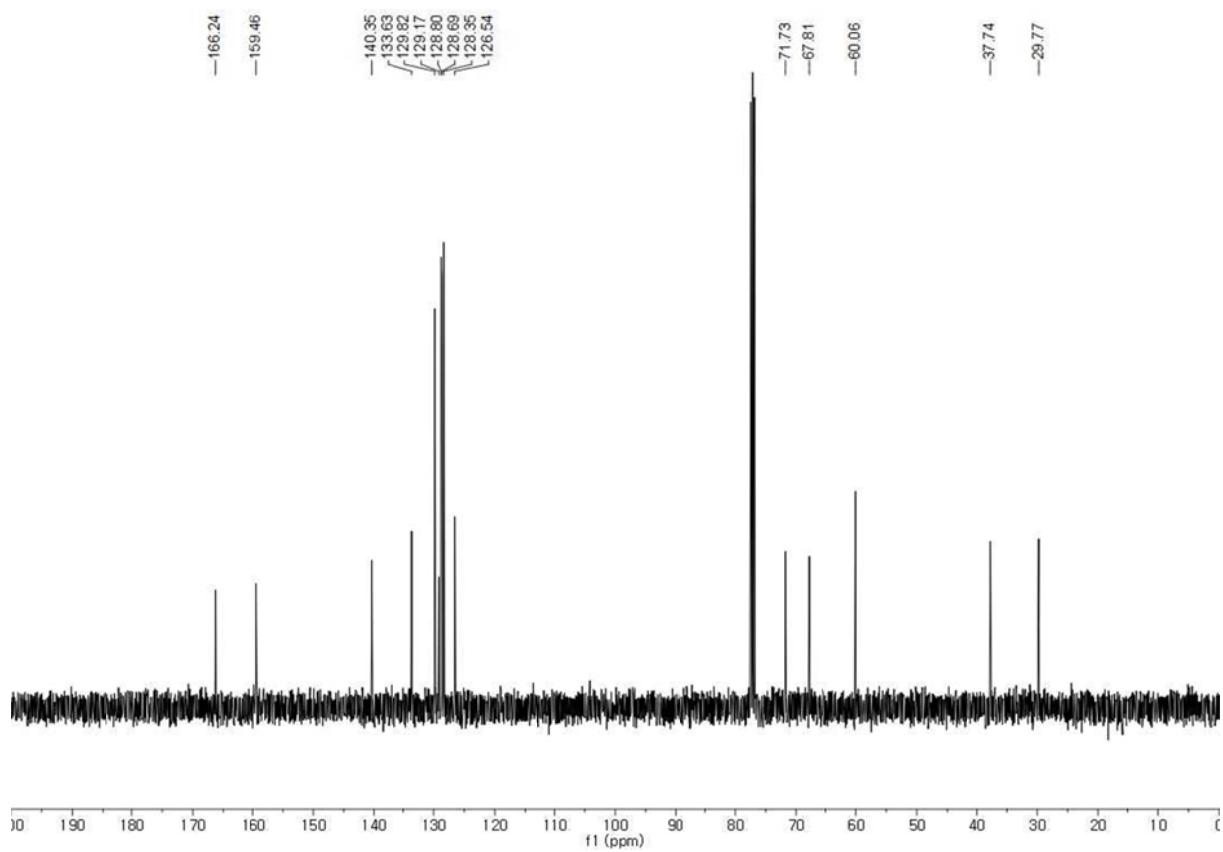

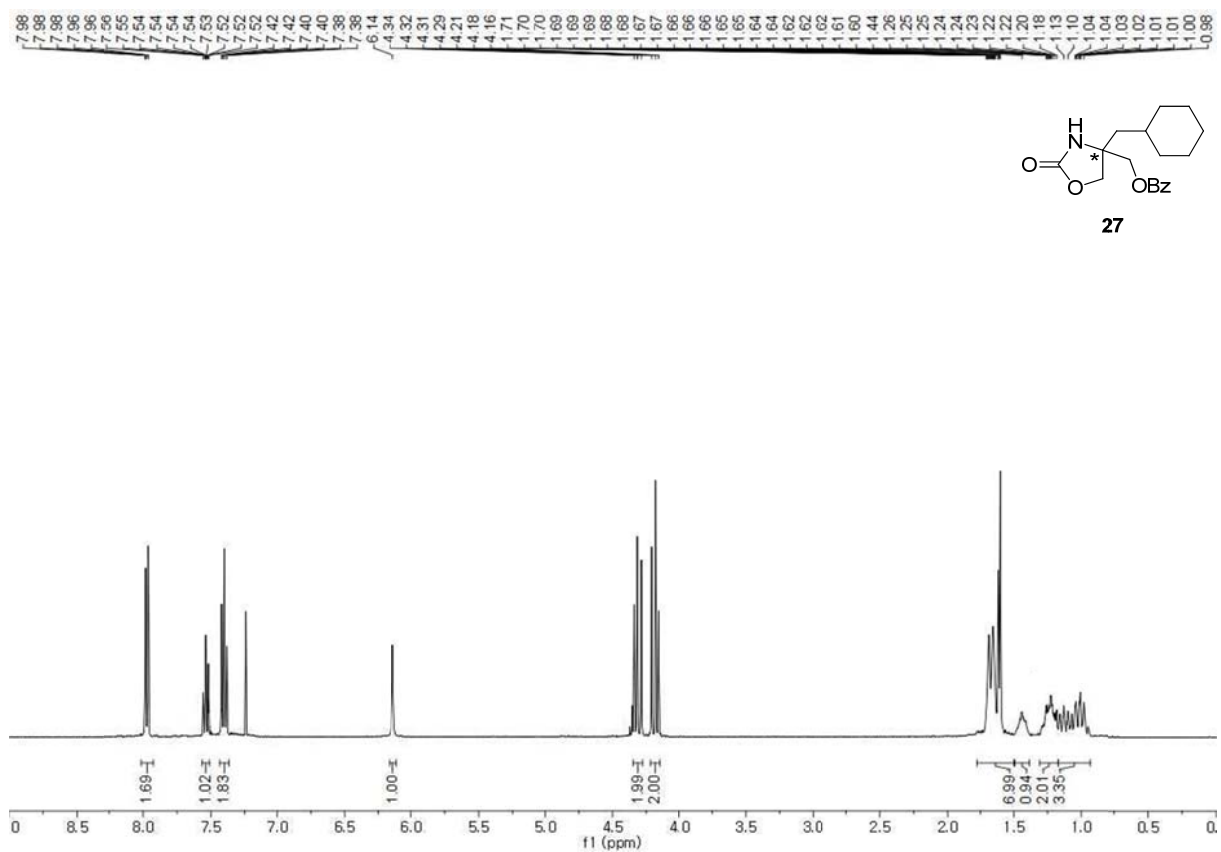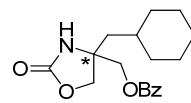

27

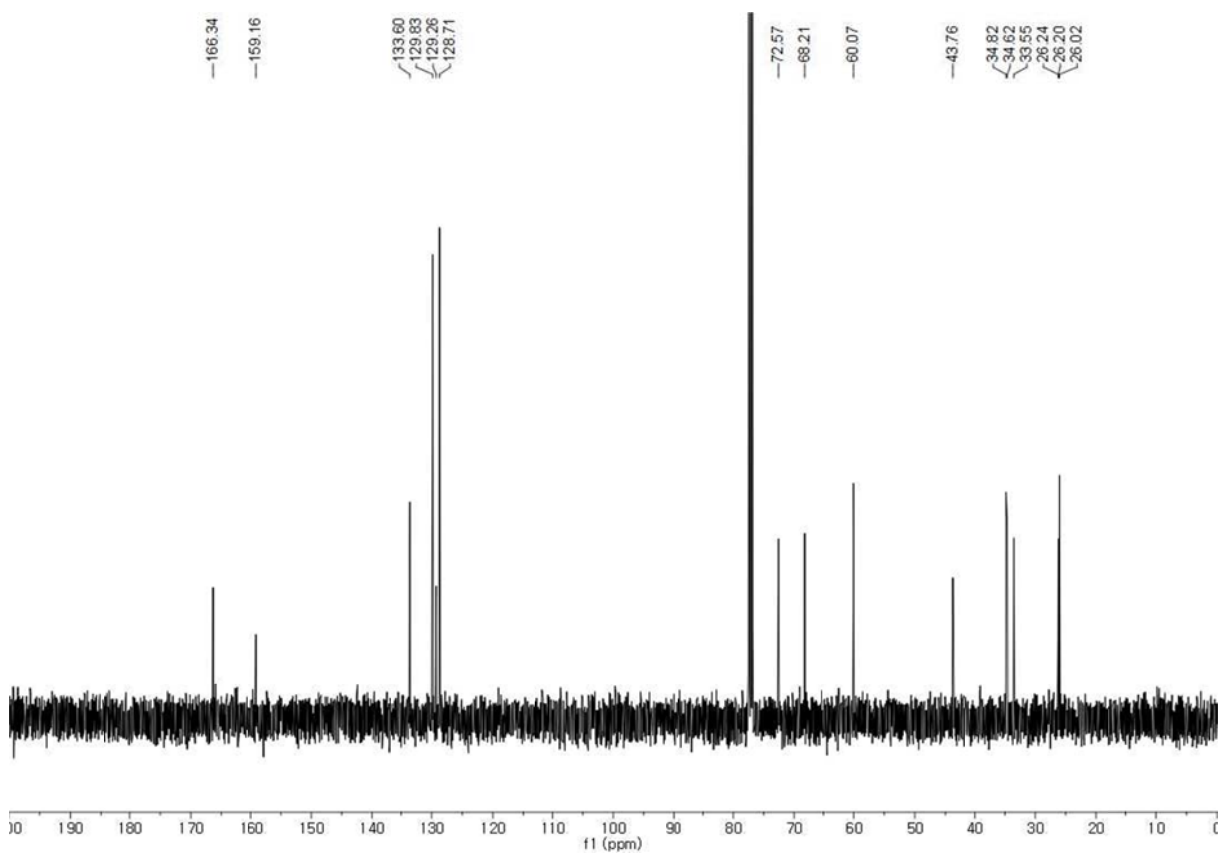

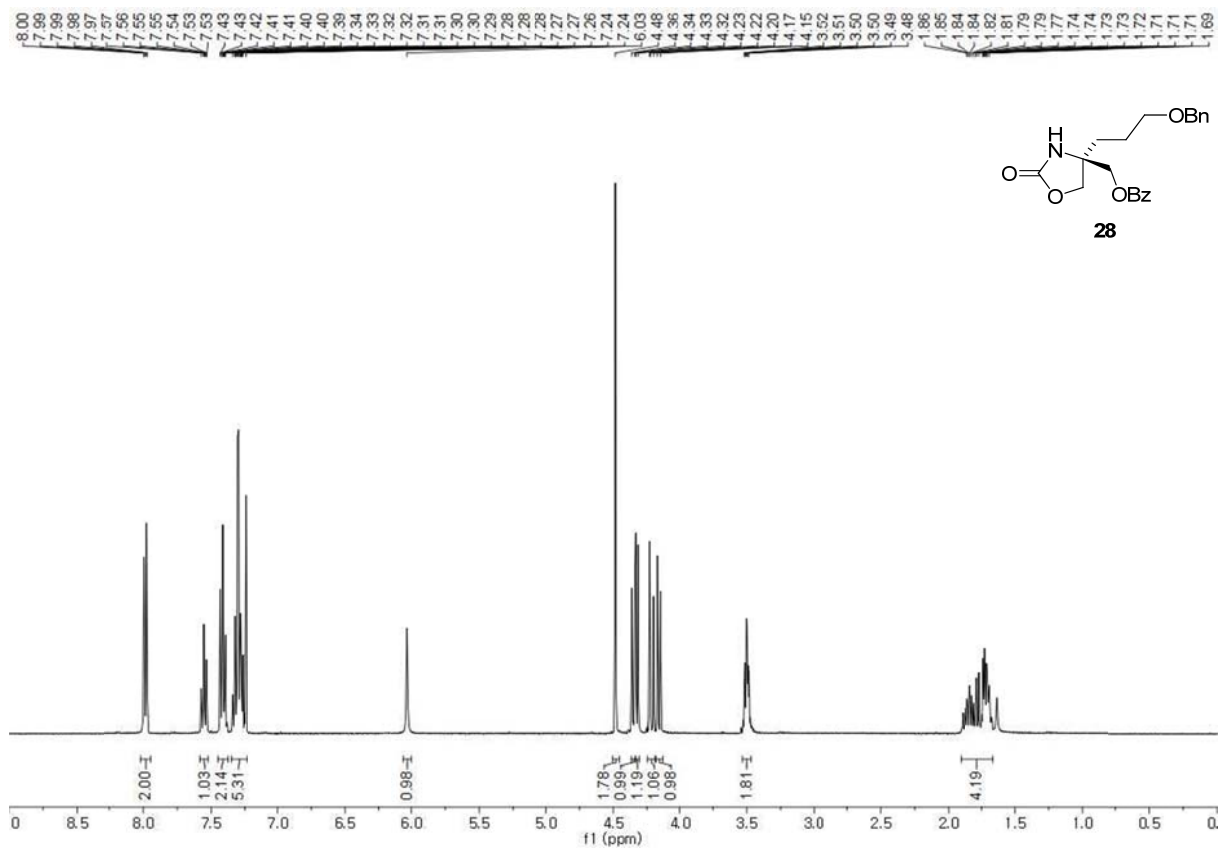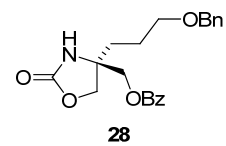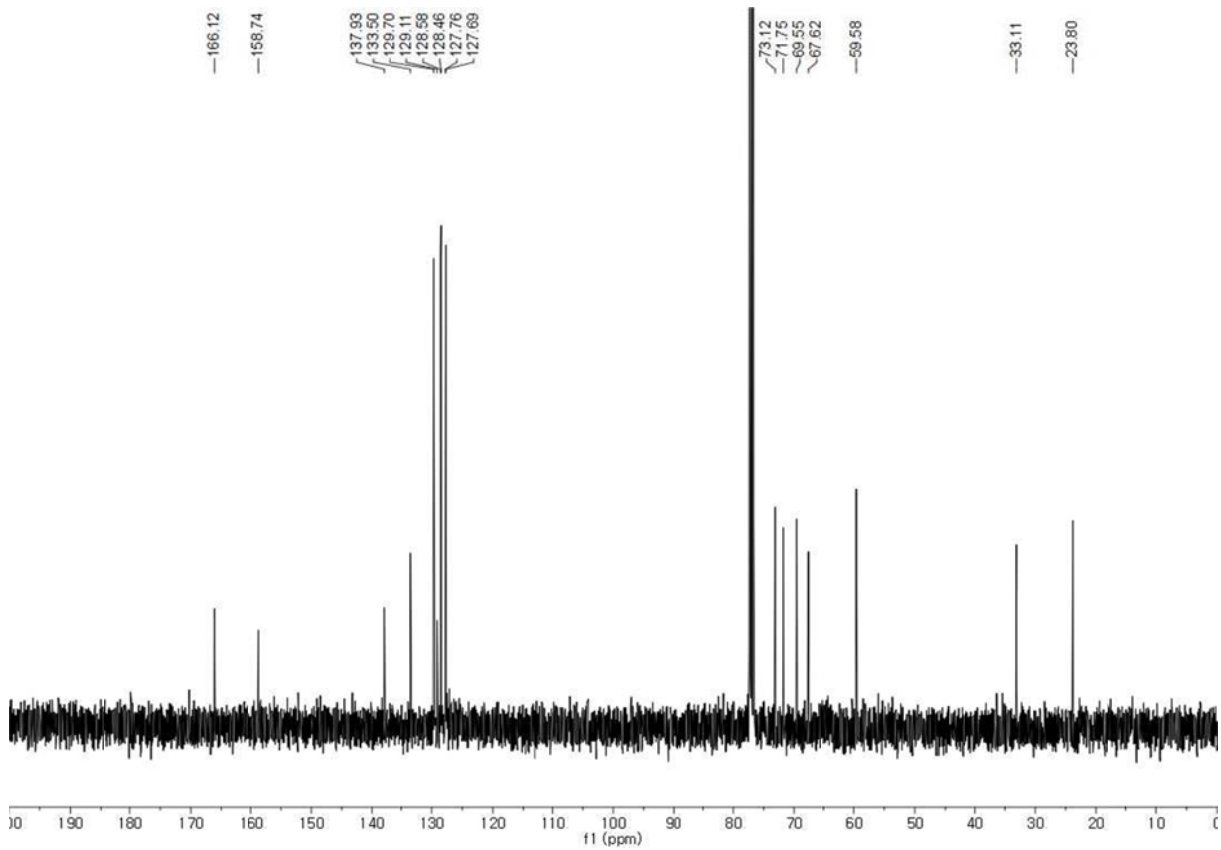

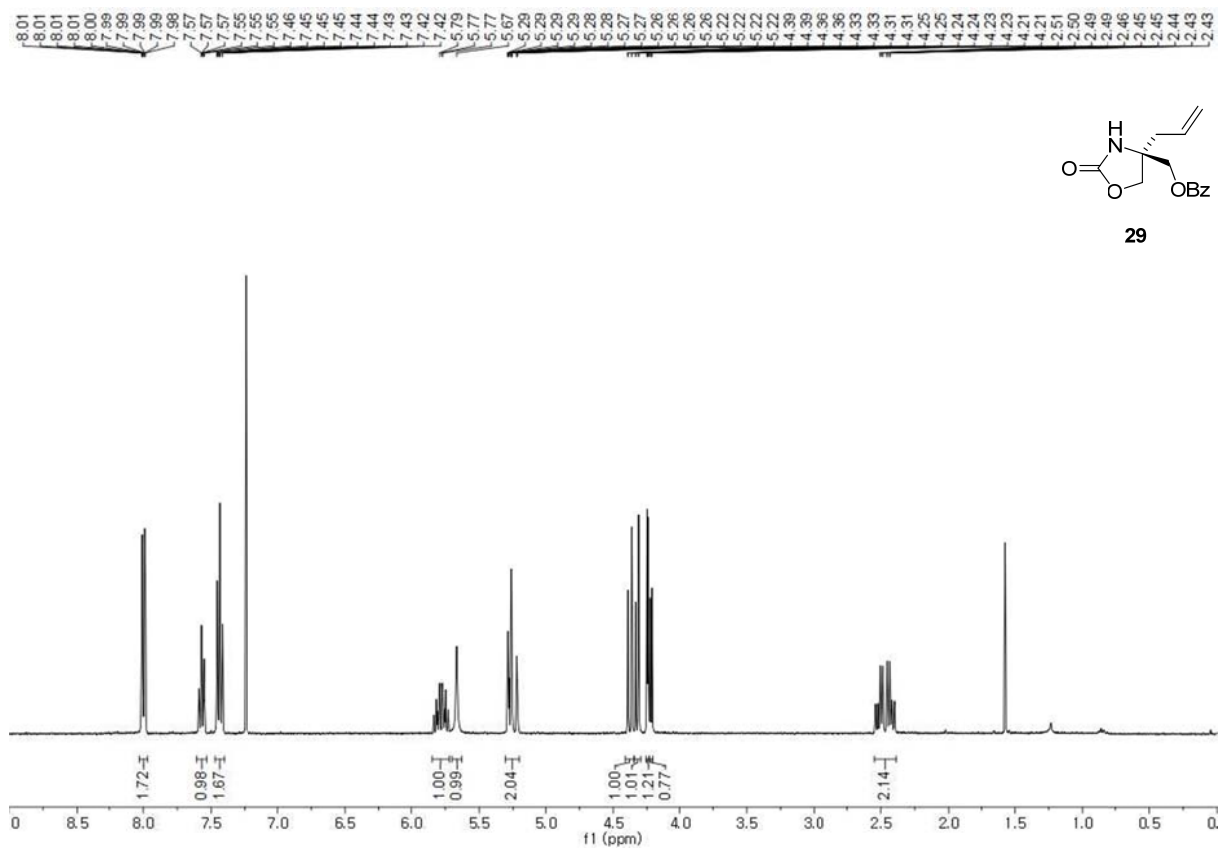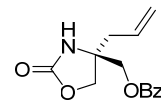

29

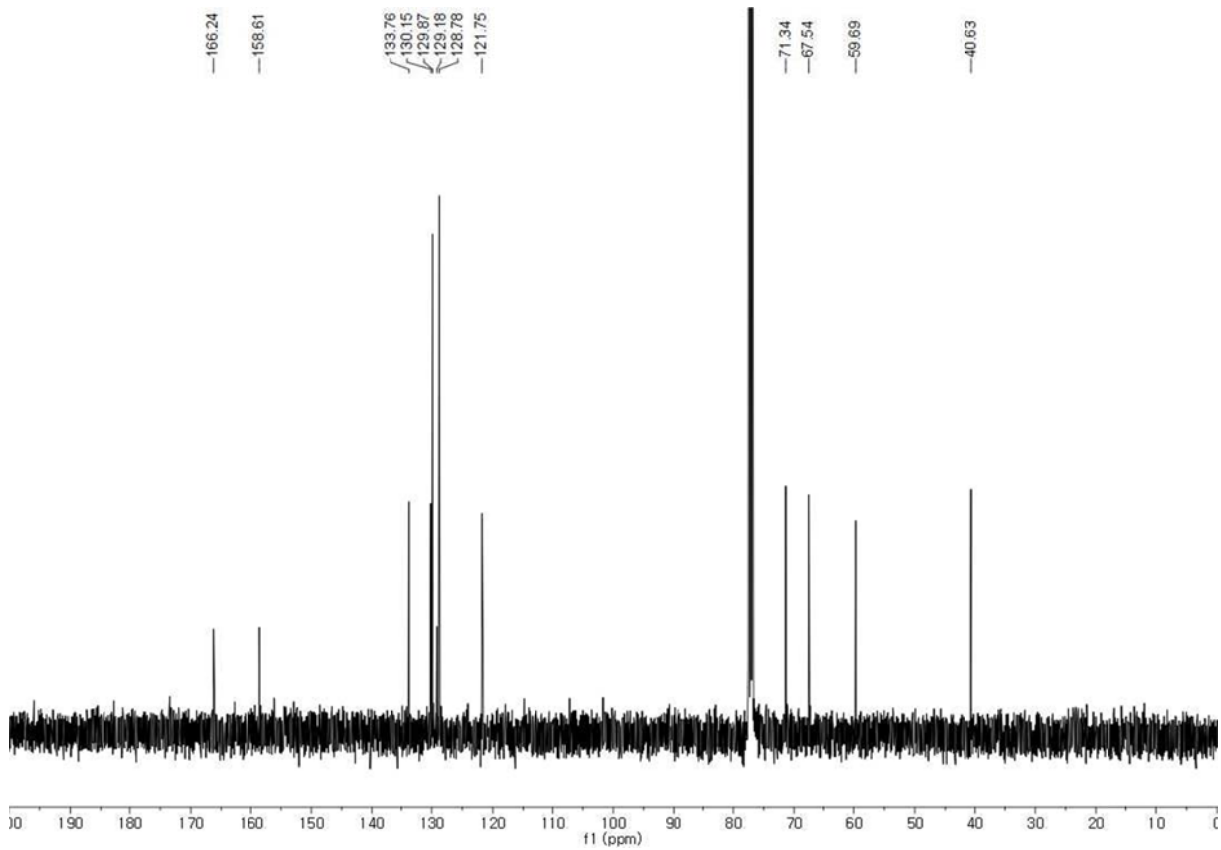







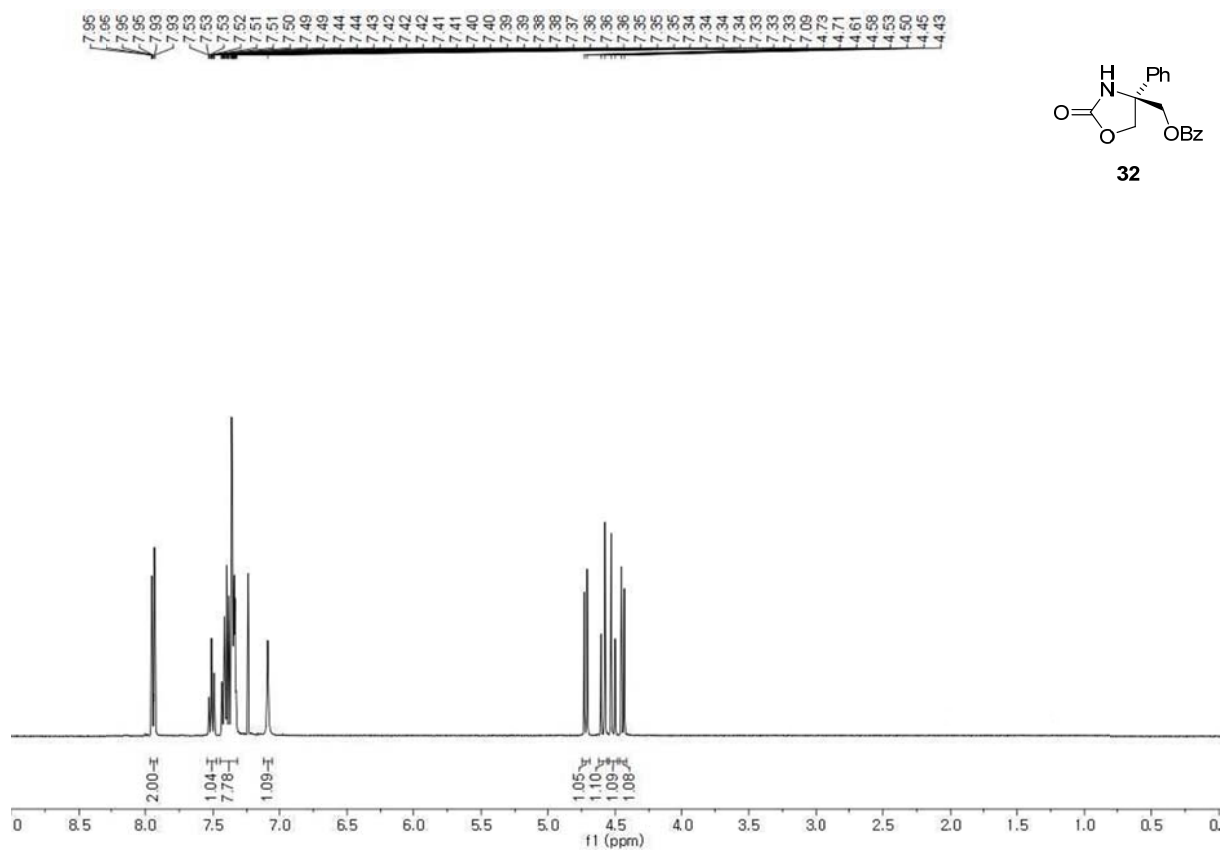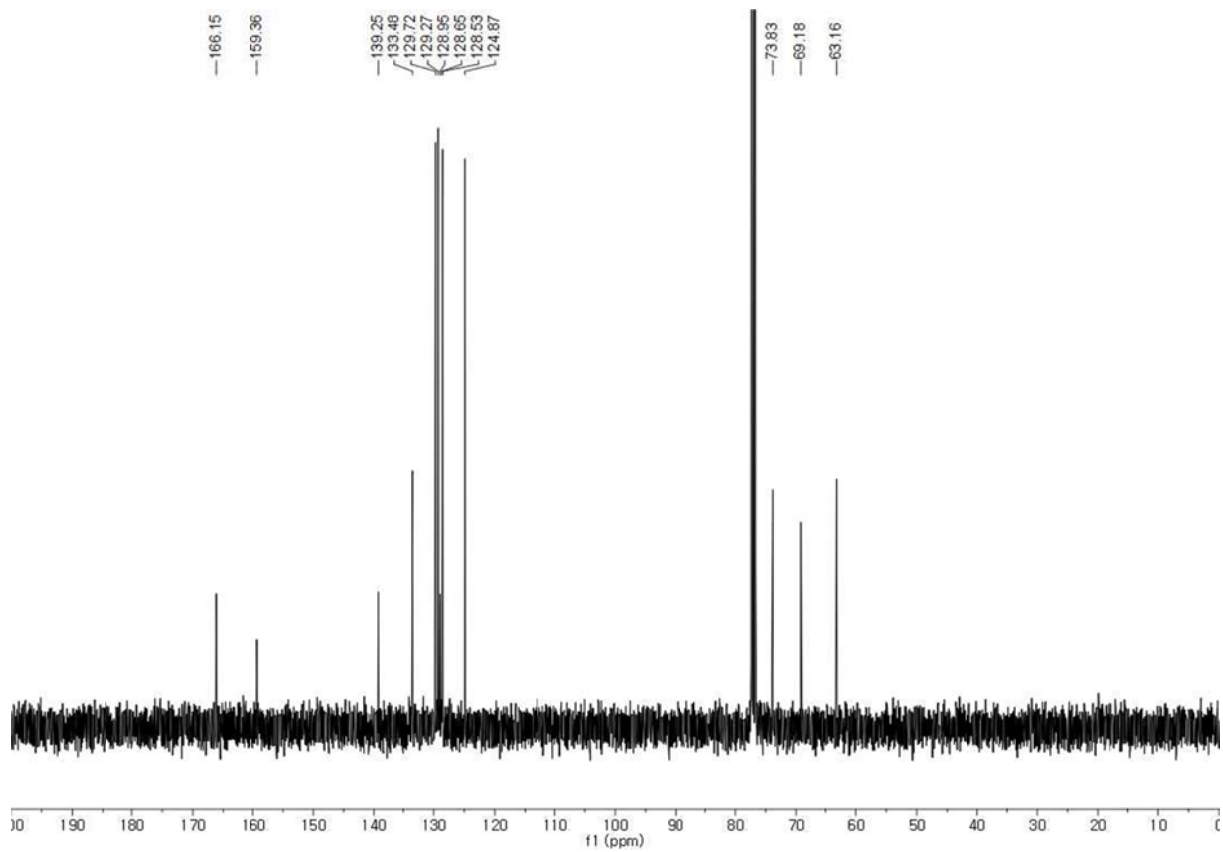

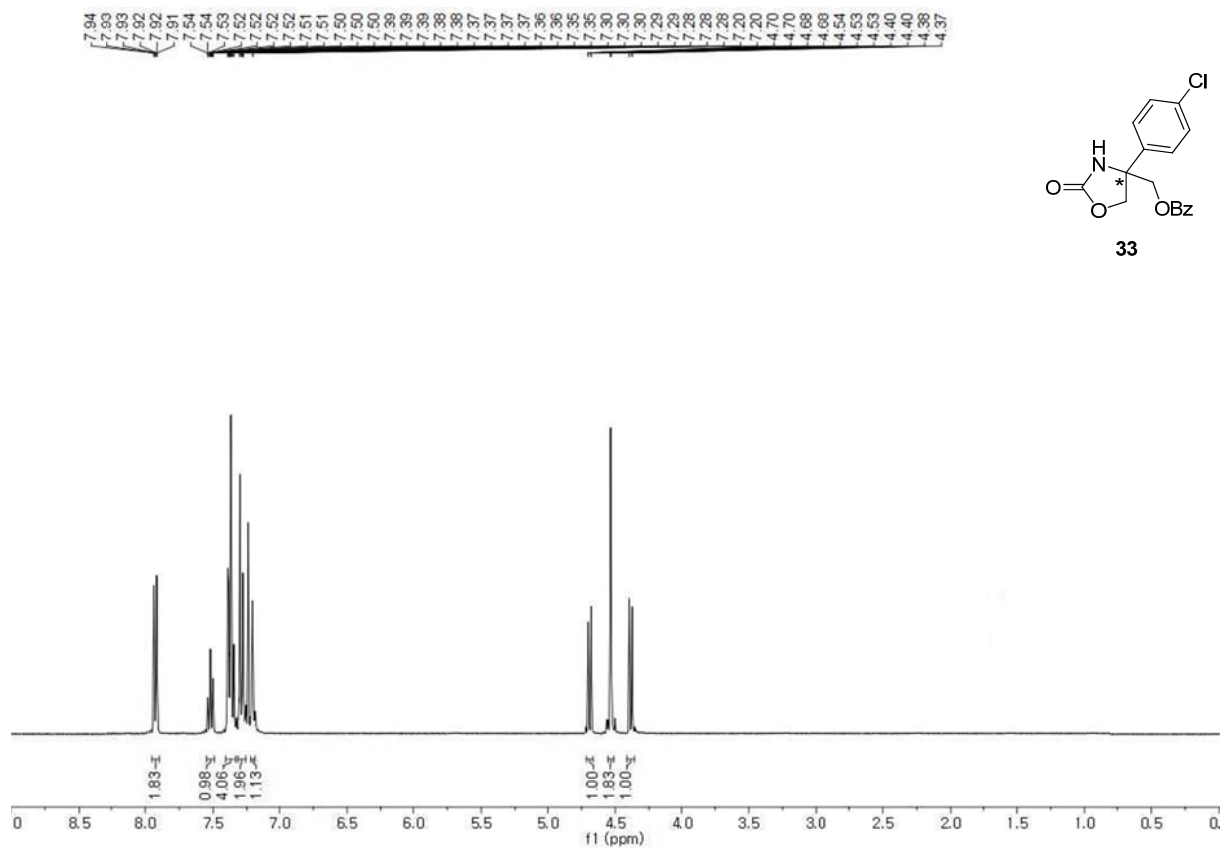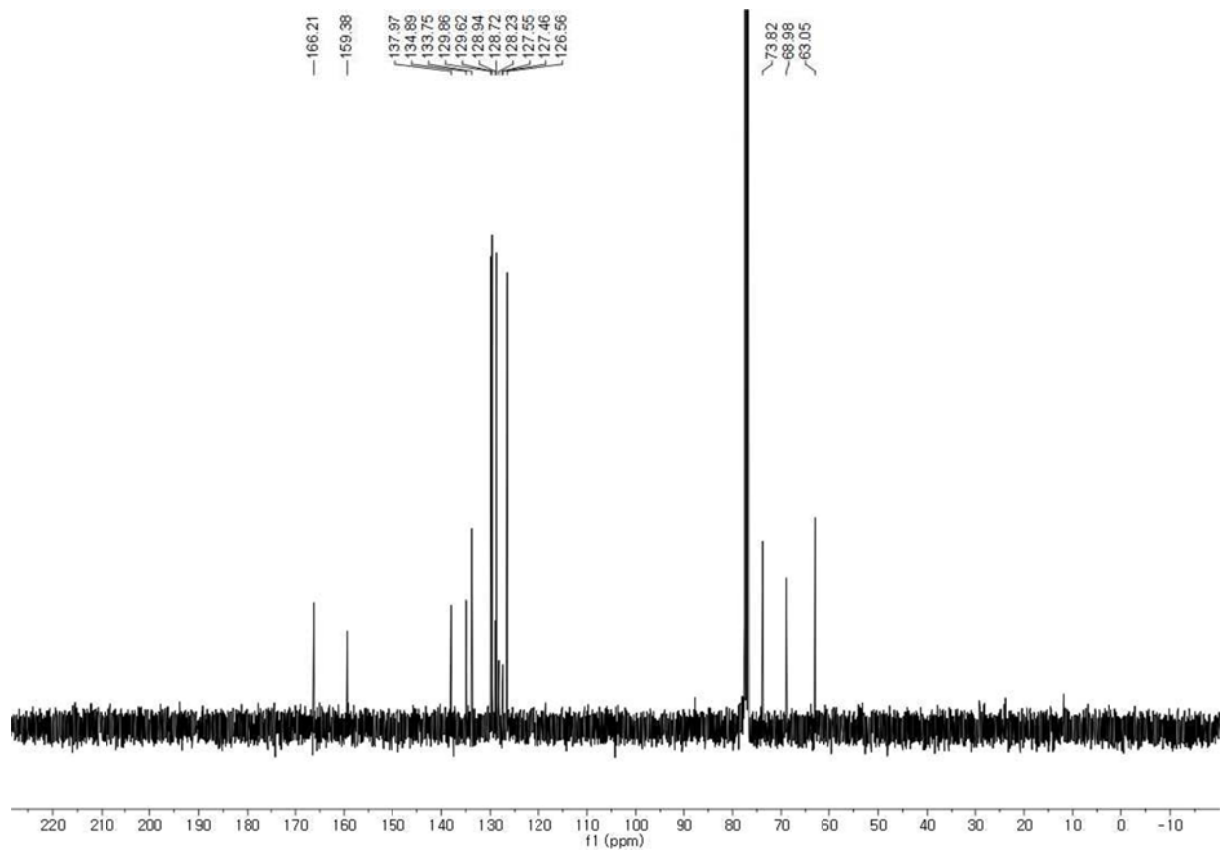

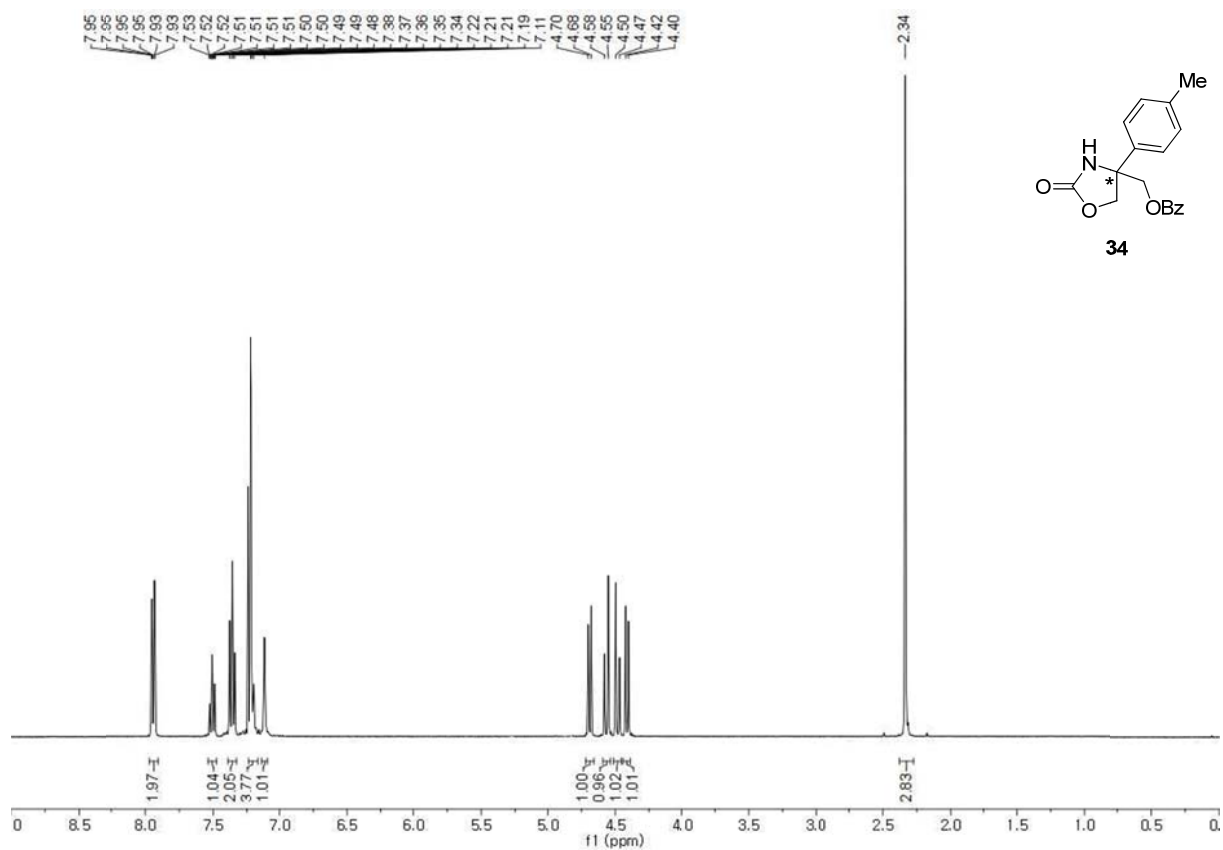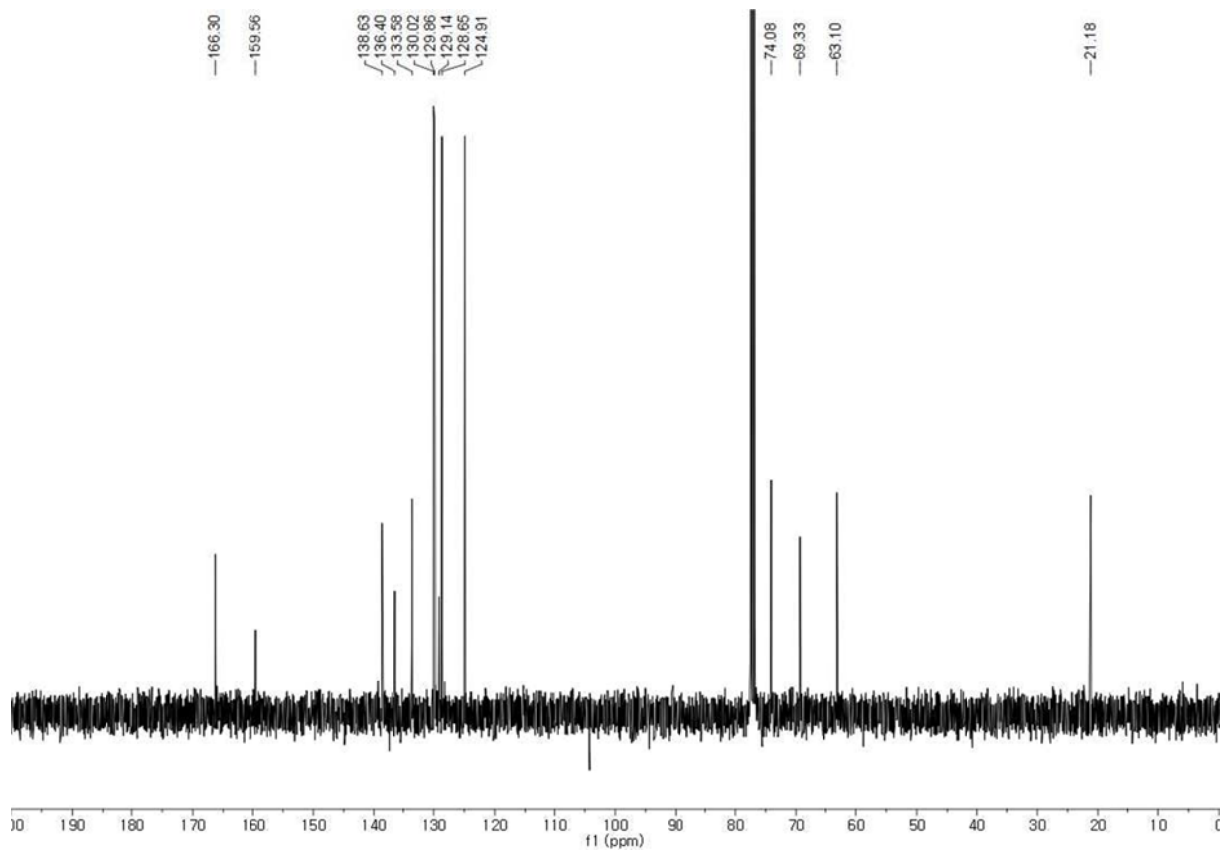

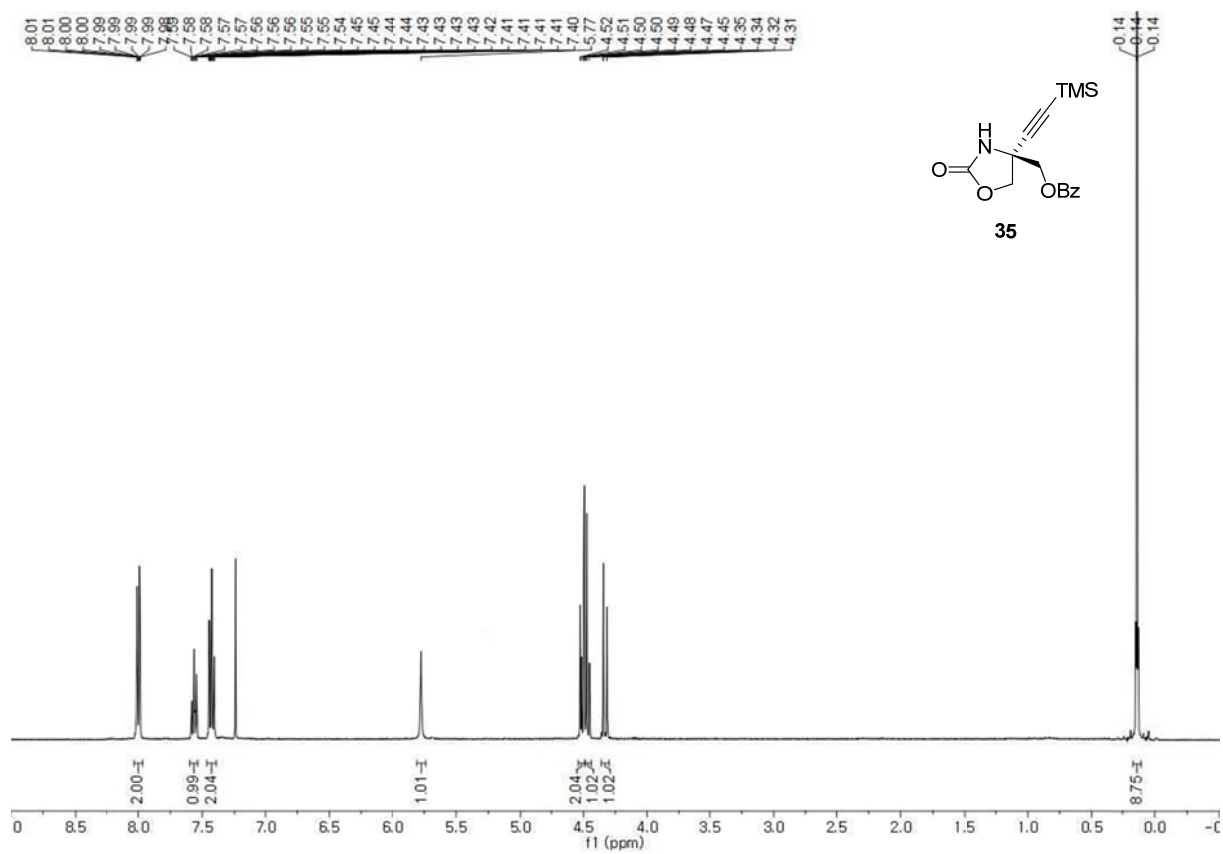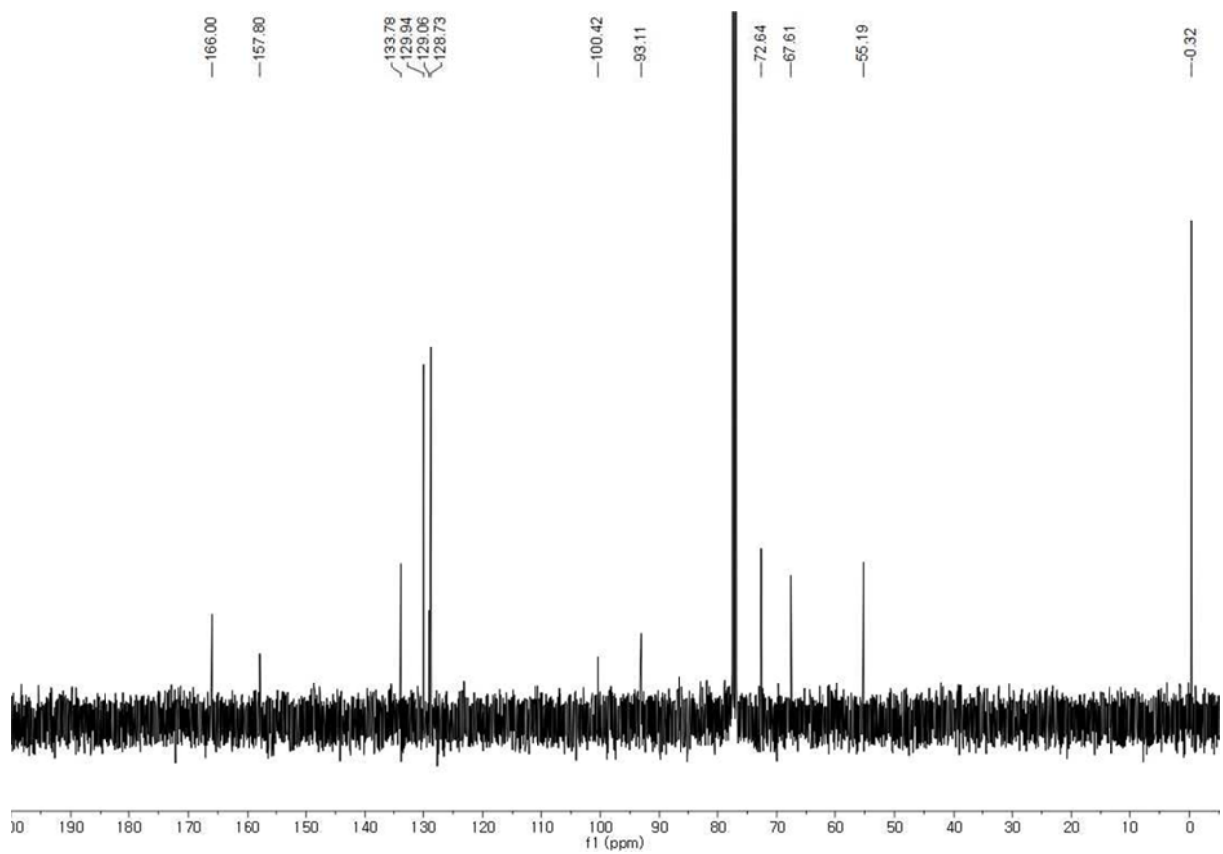

Supplement: c3cc45099f.pdf [file c3cc45099f.pdf]
